# Supplementary material for: Bullshit-sensitivity predicts prosocial behavior
Source: PLoS One. 2018 Jul 31;13(7):e0201474. doi: 10.1371/journal.pone.0201474 (PMC6067753; doi:10.1371/journal.pone.0201474)
Supplement: S4 File — (XLS) [file pone.0201474.s004.xls]

## Sheet: 180618[S4]Raw data_BS
Volunteering_decision_0NO_1YES	Donation_experience_0NO_1YES	Meaningfulness_on_bullshit_sentences	Meaningfulness_on_genuine_sentences	Bullshit_sensitivity	Sex_0female_1male	Current_age	Education	Religiosity_4items	Political_self_placement	Numeracy_correct_responses	CRT_correct_responses	Cog_ability	Time_max60	VAR00004	Time	T1_MotCog_scenario	T1_MotCog_correct	Ideology1_ecoequality_vs_ecofreedom	Ideology2R_liberalism_vs_conservatism	Ideology3_worldcitizen_vs_swede	Ideology4R_othersfeelings_vs_freespeech	Ideology2_conservatism_vs_liberalism	Ideology4_freespeech_vs_othersfeelings	Religiosity1	Spirituality1	Religiosity2	Spirituality2	Religiosity3	Religious_activities	Numeracy1	Numeracy1_response	Numeracy1_correct	Numeracy2	Numeracy2_response	Numeracy2_correct	Numeracy3	Numeracy3_response	Numeracy3_correct	CRT1	CRT1_response	CRT1_correct	CRT2	CRT2_response	CRT2_correct	CRT3	CRT3_response	CRT3_correct	BS1_Genuine	BS2_Bullshit
0	1	4.42857	2.42857	-2	1	43	4	4.25	6	0	0	0	3.68	#NULL!	3.68	2	0	6	3	5	2	5	6	1	1	5	3	5	6	2		0	2		0	2		0	2		0	2		0	2		0	1	2
0	0	3.28571	1.42857	-1.85714	0	73	2	2.5	2	0	0	0	3.3	#NULL!	3.3	3	0	5	3	5	3	5	5	2	3	3	2	3	2	1	23	0	1	2	0	2		0	2		0	2		0	2		0	1	6
1	0	3.85714	2.14286	-1.71429	1	35	3	3.75	2	1	0	1	9.28	#NULL!	9.28	4	0	2	4	2	6	4	2	5	3	3	5	4	3	2		0	1	30	1	1	300	0	1	100	0	1	30	0	2		0	2	5
1	1	4.71429	3.14286	-1.57143	0	73	2	3.5	2	0	0	0	4.93	#NULL!	4.93	2	1	6	5	1	4	3	4	1	5	2	2	4	7	2		0	2		0	1	45	0	2		0	1	6	0	2		0	1	6
0	1	4.42857	3.28571	-1.14286	0	24	3	4	4	1	1	2	4.33	#NULL!	4.33	1	0	4	5	2	5	3	3	6	6	2	6	6	2	1	10	1	1	3	0	1	10	0	1	12	0	1	5	1	1	17	0	3	5
1	0	5.28571	4.14286	-1.14286	0	38	5	5	5	0	0	0	7.15	#NULL!	7.15	2	1	4	5	1	4	3	4	6	5	6	4	7	1	1	120	0	1	7	0	1	15	0	1	6	0	1	60	0	2		0	4	6
0	1	2.85714	1.85714	-1	1	35	5	1.75	5	0	0	0	7.35	#NULL!	7.35	3	1	3	3	3	5	5	3	2	2	2	3	2	1	1	100	0	1	50	0	2		0	1	10	0	2		0	1	24	0	1	2
0	1	4.85714	3.85714	-1	1	26	5	2.75	6	1	0	1	5.37	#NULL!	5.37	3	0	6	5	4	5	3	3	2	3	4	5	4	1	1	10	1	1	3 av 5 gånger	0	2		0	1		0	1		0	1		0	4	4
0	1	5.14286	4.28571	-0.857143	1	30	4	6	6	0	0	0	7.3	#NULL!	7.3	1	0	2	6	1	6	2	2	6	7	7	6	5	6	1	20	0	1	5	0	1	20	0	1	20	0	1	20	0	1	20	0	4	5
0	0	3.57143	2.71429	-0.857143	0	29	4	2.5	6	0	0	0	8.43	#NULL!	8.43	1	1	5	3	5	3	5	5	1	1	2	1	1	6	1	50	0	1	1	0	1	0	0	1	0	0	1	20	0	1	30	0	1	3
0	#NULL!	3.57143	2.71429	-0.857143	1	26	5	3.25	7	1	0	1	8.32	#NULL!	8.32	4	0	1	4	2	7	4	1	6	4	2	3	3	2	2		0	1	30	1	2		0	1	10	0	1	500	0	2		0	3	4
1	1	3.42857	2.57143	-0.857143	1	25	3	4.25	3	0	0	0	3.87	#NULL!	3.87	2	1	3	5	4	4	3	4	3	7	3	2	7	4	2		0	2		0	2		0	2		0	2		0	2		0	2	3
0	1	4.14286	3.42857	-0.714286	0	32	3	4	5	1	0	1	60	#NULL!	77.72	3	0	2	6	2	6	2	2	5	6	5	5	3	3	1	10	1	1	25	0	2		0	1	10	0	1	100	0	1	24	0	3	4
0	1	4.14286	3.42857	-0.714286	0	35	5	4	7	0	0	0	10.43	#NULL!	10.43	4	0	6	4	2	4	4	4	4	4	3	5	6	3	2		0	2		0	2		0	2		0	2		0	2		0	4	3
0	0	3.57143	2.85714	-0.714286	1	20	2	2.25	4	0	0	0	4.27	#NULL!	4.27	2	1	4	6	3	5	2	3	2	3	3	4	2	2	1	665	0	1	34	0	1	67	0	2		0	1	100	0	2		0	3	2
0	0	4	3.28571	-0.714286	1	21	3	2.5	2	0	0	0	6.58	#NULL!	6.58	1	0	3	2	2	1	6	7	4	5	3	3	2	1	1	67	0	1	4	0	1	299	0	1	66	0	1	98	0	1	24	0	1	1
0	0	2.71429	2	-0.714286	1	22	4	2.75	5	1	0	1	12.45	#NULL!	12.45	1	1	4	4	4	5	4	3	4	4	3	2	3	1	1	10	1	2		0	2		0	2		0	2		0	2		0	2	2
0	0	2.85714	2.14286	-0.714286	1	34	3	2	2	0	0	0	6.58	#NULL!	6.58	3	1	1	5	1	7	3	1	2	2	2	2	3	1	1	2	0	1	10	0	1	30	0	1	10	0	1	100	0	1	24	0	1	3
1	0	3.85714	3.28571	-0.571429	0	28	5	4.5	4	0	0	0	2.9	#NULL!	2.9	3	0	2	6	3	3	2	5	4	3	2	5	5	7	1	500	0	1	25	0	1	40	0	1	60	0	1	4	0	1	30	0	2	3
1	1	3.57143	3	-0.571429	1	28	3	4	3	0	0	0	17.25	#NULL!	17.25	2	0	2	5	3	2	3	6	4	4	4	5	5	3	1	1	0	1	5	0	2		0	1	10	0	1	100	0	1	24	0	3	2
0	0	5.71429	5.14286	-0.571429	1	71	2	4	5	1	0	1	16.42	#NULL!	16.42	4	1	3	6	1	4	2	4	5	7	6	6	4	1	1	10	1	1	5	0	1	3	0	1	10	0	1	100	0	1	0	0	6	6
0	1	4.28571	3.71429	-0.571429	0	27	5	3.5	7	0	0	0	54.03	#NULL!	54.03	1	0	3	5	3	5	3	3	5	3	3	5	5	1	1	1	0	1	8	0	1	10	0	1	10	0	1	100	0	1	12	0	4	4
0	1	2.42857	1.85714	-0.571429	1	27	3	2.25	2	0	0	0	8.73	#NULL!	8.73	3	0	1	7	4	5	1	3	1	3	3	2	3	2	1	100	0	1	5	0	1	5	0	1	10	0	1	100	0	1	98	0	1	2
0	0	3.57143	3.14286	-0.428571	0	23	2	4.75	6	0	0	0	6.77	#NULL!	6.77	2	1	5	6	3	6	2	2	5	1	6	3	3	5	1	10000	0	1	40	0	2		0	1	2000	0	1	3	0	2		0	2	4
0	0	4.71429	4.28571	-0.428571	0	34	5	4.75	1	0	0	0	9.77	#NULL!	9.77	4	1	4	3	5	4	5	4	6	6	6	6	5	2	2		0	2		0	2		0	2		0	2		0	2		0	4	5
1	1	3.85714	3.42857	-0.428571	1	71	2	4.75	5	0	0	0	26.47	#NULL!	26.47	2	1	3	4	4	7	4	1	6	6	5	5	5	3	1	5	0	1	4	0	2		0	1	10	0	2		0	2		0	4	3
0	1	3.85714	3.42857	-0.428571	0	21	3	3	4	0	0	0	4	#NULL!	4	3	0	1	2	2	7	6	1	5	2	1	5	3	3	1	40	0	1	45	0	1	50	0	1	500	0	2		0	2		0	1	6
0	1	3.71429	3.28571	-0.428571	1	31	3	2.75	5	0	0	0	6.48	#NULL!	6.48	3	0	3	5	4	5	3	3	2	7	2	5	1	6	1	50	0	1	3	0	1	10	0	1	20	0	1	500	0	2		0	3	3
0	1	3.71429	3.28571	-0.428571	0	39	5	4.25	5	0	0	0	4.72	#NULL!	4.72	4	1	5	4	3	4	4	4	3	2	4	3	4	6	1	100	0	2		0	2		0	1	10	0	1	100	0	2		0	2	2
0	1	3.85714	3.42857	-0.428571	1	32	4	4	7	0	0	0	22.78	#NULL!	22.78	2	1	2	7	7	1	1	7	7	7	7	7	1	1	1	1	0	1	25	0	1	50	0	1	10	0	1	100	0	1	24	0	4	3
0	1	3.71429	3.28571	-0.428571	1	23	3	3.25	8	0	0	0	8.05	#NULL!	8.05	3	1	2	7	2	7	1	1	4	5	4	1	2	3	2		0	2		0	2		0	2		0	2		0	2		0	3	4
1	0	4	3.57143	-0.428571	1	34	3	4	5	1	2	3	12.37	#NULL!	12.37	2	1	4	5	2	2	3	6	5	5	3	4	3	5	1	10	1	1	25	0	1	30	0	1	5	1	1	5	1	2		0	6	4
1	0	4	3.57143	-0.428571	1	20	5	5.75	9	0	1	1	6.78	#NULL!	6.78	4	0	6	5	4	4	3	4	7	5	6	4	3	7	2		0	2		0	2		0	2		0	1	5	1	2		0	6	5
1	0	2.42857	2	-0.428571	0	52	2	2.75	4	0	0	0	4.02	#NULL!	4.02	1	0	1	6	1	7	2	1	2	2	3	2	3	3	1	134	0	1	3	0	2		0	2		0	2		0	1	35	0	1	1
0	0	3	2.57143	-0.428571	1	73	2	2	5	0	0	0	4.28	#NULL!	4.28	2	0	5	2	2	5	6	3	1	6	1	3	3	3	2		0	2		0	2		0	2		0	2		0	2		0	1	4
1	1	3.28571	2.85714	-0.428571	0	38	5	4.25	2	1	3	4	31.55	#NULL!	31.55	1	0	2	3	2	3	5	5	5	6	4	5	5	3	1	10	1	1	60%	0	1	10	0	1	5	1	1	5	1	1	47	1	4	2
0	1	3.28571	2.85714	-0.428571	0	24	4	3.5	5	0	0	0	28.55	#NULL!	28.55	3	1	7	1	1	1	7	7	4	4	3	7	4	3	1	100	0	1	5	0	1	10	0	1	10	0	1	100	0	1	24	0	4	4
0	1	3.14286	2.71429	-0.428571	1	26	2	3.25	5	2	1	3	11.53	#NULL!	11.53	4	1	1	7	1	7	1	1	4	4	4	4	4	1	1	10	1	1	30	1	1	300	0	1	5	1	1	100	0	1	24	0	3	3
0	0	5.14286	4.85714	-0.285714	1	75	3	5.5	9	0	0	0	24.23	#NULL!	24.23	3	1	4	7	7	7	1	1	5	3	5	2	5	7	2		0	2		0	2		0	1	10	0	2		0	2		0	5	5
0	0	4.14286	3.85714	-0.285714	0	40	3	1	5	2	0	2	33.53	#NULL!	33.53	1	1	7	1	7	7	7	1	1	7	1	1	1	1	1	10	1	1	30	1	1	40	0	1	10	0	1	100	0	1	12	0	1	6
0	0	3.71429	3.42857	-0.285714	0	51	5	3	8	2	0	2	22	#NULL!	22	4	0	5	2	5	6	6	2	4	4	3	5	4	1	1	10	1	1	30	1	2		0	1	10	0	1	100	0	2		0	4	4
0	0	2.71429	2.42857	-0.285714	1	58	3	2	6	1	0	1	8.48	#NULL!	8.48	3	1	4	2	4	7	6	1	2	3	4	2	1	1	1	10	1	1	12	0	1	15	0	1	10	0	1	25	0	1	24	0	4	3
1	1	3.71429	3.42857	-0.285714	0	28	4	4.5	6	0	0	0	7.28	#NULL!	7.28	3	1	3	3	4	3	5	5	5	5	5	6	2	6	2		0	2		0	2		0	2		0	2		0	2		0	2	2
0	1	2.71429	2.42857	-0.285714	1	19	3	3.25	3	0	0	0	5.27	#NULL!	5.27	1	0	2	5	3	4	3	4	2	2	4	5	3	4	1	7	0	1	4	0	1	1	0	1	12	0	1	7	0	1	2	0	2	3
1	0	4	3.71429	-0.285714	1	31	5	1.75	9	3	1	4	16.32	#NULL!	16.32	2	0	6	7	7	7	1	1	1	2	3	3	1	2	1	10	1	1	30	1	1	25	1	1	10	0	1	100	0	1	47	1	1	4
0	0	3.14286	2.85714	-0.285714	0	47	2	3	3	0	0	0	6.78	#NULL!	6.78	1	0	3	2	4	6	6	2	3	4	3	3	3	3	1	45	0	1	18	0	1	20	0	1	56	0	1	56	0	1	77	0	2	3
0	0	2.14286	1.85714	-0.285714	1	27	5	2.25	5	0	0	0	13.63	#NULL!	13.63	1	0	4	5	5	4	3	4	3	4	4	5	1	1	2		0	2		0	2		0	2		0	2		0	2		0	1	2
1	0	3.57143	3.42857	-0.142857	1	29	2	2.5	6	3	1	4	27.93	#NULL!	27.93	3	1	6	5	5	5	3	3	4	4	4	5	1	1	1	10	1	1	30	1	1	25	1	1	5	1	1	100	0	1	24	0	4	4
0	0	3.57143	3.42857	-0.142857	1	20	3	4	5	0	0	0	3.42	#NULL!	3.42	2	1	4	4	4	4	4	4	4	4	4	4	4	4	2		0	2		0	2		0	2		0	2		0	2		0	3	4
0	0	3.57143	3.42857	-0.142857	1	23	2	3.25	5	0	0	0	9.52	#NULL!	9.52	2	1	7	4	7	4	4	4	4	4	4	4	4	1	2		0	2		0	2		0	2		0	2		0	2		0	3	3
0	0	3.57143	3.42857	-0.142857	0	42	3	4.25	5	1	0	1	23.52	#NULL!	23.52	1	0	4	2	7	7	6	1	4	2	4	1	4	5	1	1	0	2		0	1	25	1	1	10	0	1	1	0	2		0	3	5
1	1	3.57143	3.42857	-0.142857	1	38	3	3.5	6	0	0	0	6.9	#NULL!	6.9	3	0	2	6	5	4	2	4	3	4	2	2	3	6	1	50	0	1	3	0	1	40	0	2		0	2		0	1	4	0	3	5
1	0	3.85714	3.71429	-0.142857	1	22	3	4	5	2	0	2	5.83	#NULL!	5.83	4	1	4	5	5	5	3	3	5	4	5	2	5	1	1	10	1	1	25	0	1	25	1	1	10	0	1	1	0	2		0	2	3
1	0	3.14286	3	-0.142857	1	19	2	3.5	5	1	0	1	19.75	#NULL!	19.75	4	0	4	4	4	4	4	4	4	4	4	4	3	3	1	10	1	2		0	2		0	1	10	0	1	100	0	1	24	0	3	3
1	0	3	2.85714	-0.142857	0	19	2	3.25	5	0	0	0	15.08	#NULL!	15.08	2	0	1	4	1	6	4	2	4	4	4	4	4	1	2		0	2		0	2		0	2		0	1	100	0	2		0	3	3
0	0	3.71429	3.57143	-0.142857	1	28	3	2	7	0	0	0	11.38	#NULL!	11.38	4	0	2	6	6	6	2	2	3	3	3	4	1	1	2		0	2		0	2		0	2		0	2		0	2		0	2	3
0	0	3.85714	3.71429	-0.142857	0	28	3	5.5	2	0	1	1	3.68	#NULL!	3.68	3	0	2	5	2	5	3	3	6	5	6	6	5	5	1	50	0	1	10	0	1	56	0	1	2423	0	1	5	1	1	7	0	5	6
0	0	2.28571	2.14286	-0.142857	1	24	4	2.75	2	0	0	0	4.45	#NULL!	4.45	3	1	4	5	4	4	3	4	3	3	3	2	3	2	2		0	2		0	2		0	2		0	2		0	2		0	1	1
0	0	2.71429	2.57143	-0.142857	1	60	1	2.5	5	0	0	0	8.77	#NULL!	8.77	2	1	5	7	1	5	1	3	1	4	4	4	3	2	2		0	2		0	2		0	2		0	2		0	2		0	2	2
1	1	4	3.85714	-0.142857	1	44	4	2.5	4	0	0	0	24.9	#NULL!	24.9	1	0	1	1	1	1	7	7	4	4	4	5	1	1	1	100	0	2		0	2		0	2		0	2		0	2		0	3	4
1	1	3.14286	3	-0.142857	0	60	3	3.25	5	0	1	1	23.25	#NULL!	23.25	2	1	4	4	6	4	4	4	5	4	3	4	2	3	2		0	2		0	2		0	1	5	1	2		0	2		0	2	3
1	1	2.71429	2.57143	-0.142857	1	18	3	3.75	3	0	0	0	8.07	#NULL!	8.07	1	0	5	4	4	5	4	3	4	4	4	4	4	3	2		0	2		0	2		0	2		0	2		0	2		0	3	3
0	1	3.71429	3.57143	-0.142857	0	33	3	4.25	5	1	0	1	32.05	#NULL!	32.05	1	0	2	5	6	6	3	2	5	6	4	3	4	4	1	10	1	1	25	0	2		0	1	10	0	1	100	0	1	24	0	4	2
0	1	3.28571	3.14286	-0.142857	0	74	3	2.5	6	0	0	0	6.47	#NULL!	6.47	1	0	1	5	1	4	3	4	2	2	2	2	2	4	1		0	1		0	1	467	0	1		0	1		0	1	156	0	2	2
0	1	3.14286	3	-0.142857	1	69	2	1.5	3	0	0	0	18.92	#NULL!	18.92	3	1	4	4	7	7	4	1	2	3	2	4	1	1	1	1	0	1	5	0	2		0	2		0	2		0	2		0	2	2
0	1	3.85714	3.71429	-0.142857	1	25	5	4.5	7	2	1	3	15.8	#NULL!	15.8	1	1	5	6	6	7	2	1	4	6	3	3	5	6	1	10	1	1	30	1	1	40	0	1	105	0	1	50	0	1	47	1	3	4
0	1	3.14286	3	-0.142857	0	42	3	4.25	6	0	0	0	11.98	#NULL!	11.98	1	0	5	5	3	6	3	2	5	5	5	5	6	1	2		0	1	25	0	2		0	2		0	1	100	0	2		0	3	3
0	1	3	2.85714	-0.142857	1	43	3	3.75	5	0	0	0	13.42	#NULL!	13.42	4	1	4	5	4	6	3	2	4	4	4	5	3	4	1	1	0	2		0	2		0	2		0	2		0	2		0	1	2
0	1	3.28571	3.14286	-0.142857	1	26	5	3.25	5	0	0	0	60	#NULL!	100.33	2	0	2	5	4	5	3	3	4	4	4	4	4	1	1	vet inte	0	2		0	2		0	2		0	1	1	0	1	24	0	2	3
0	1	3.42857	3.28571	-0.142857	0	30	2	4.5	5	1	0	1	9.62	#NULL!	9.62	2	1	4	4	4	4	4	4	4	4	6	4	5	3	1	10	1	1	20	0	1	45	0	1	70	0	1	80	0	1	56	0	3	3
0	1	3.28571	3.14286	-0.142857	0	36	2	3.75	5	0	0	0	9	#NULL!	9	2	1	4	4	4	1	4	7	4	4	4	4	4	3	2		0	2		0	2		0	2		0	2		0	2		0	3	3
0	1	3.28571	3.14286	-0.142857	0	72	2	2.75	2	0	0	0	3.98	#NULL!	3.98	1	0	4	3	4	5	5	3	1	3	4	4	4	2	1		0	1		0	1		0	1		0	1		0	1		0	2	3
0	1	5.28571	5.14286	-0.142857	0	74	2	6.5	7	0	0	0	16.05	#NULL!	16.05	3	0	4	5	5	4	3	4	6	7	7	7	7	6	1	100	0	2		0	1	20	0	1	10	0	2		0	2		0	5	5
0	1	4.57143	4.42857	-0.142857	0	70	5	2.25	7	1	0	1	30.68	#NULL!	30.68	1	1	4	5	4	4	3	4	2	4	4	4	2	1	1	10	1	1	5	0	2		0	2		0	2		0	2		0	4	4
1	0	4.42857	4.42857	0	0	21	4	2.25	3	0	0	0	7.08	#NULL!	7.08	1	0	3	5	3	5	3	3	2	5	2	3	1	4	2		0	2		0	2		0	2		0	2		0	2		0	6	5
1	0	5	5	0	1	33	3	5.25	5	0	0	0	12.13	#NULL!	12.13	1	1	6	2	6	2	6	6	6	6	6	6	6	3	2		0	2		0	2		0	2		0	2		0	2		0	5	5
1	0	4	4	0	0	28	4	2.75	3	0	0	0	9.02	#NULL!	9.02	1	0	3	4	3	5	4	3	3	3	3	3	3	2	2		0	1	2	0	2		0	2		0	2		0	2		0	4	4
1	0	3	3	0	1	27	3	3.25	4	0	0	0	3.62	#NULL!	3.62	1	0	4	4	4	5	4	3	3	3	3	3	3	4	2		0	2		0	2		0	2		0	2		0	2		0	3	3
1	0	3	3	0	1	36	5	2.75	3	0	0	0	10.05	#NULL!	10.05	3	0	4	5	3	4	3	4	3	4	3	4	4	1	1	2	0	1	3	0	1	20	0	1	1	0	2		0	2		0	2	3
1	0	2.57143	2.57143	0	1	66	2	1	3	1	1	2	26.47	#NULL!	26.47	1	1	3	1	3	5	7	3	1	1	1	4	1	1	1	10	1	1	25	0	2		0	1	10	0	1	5	1	2		0	1	1
1	0	1	1	0	0	58	4	3.25	6	1	1	2	12.73	#NULL!	12.73	3	1	4	4	4	4	4	4	4	4	4	4	4	1	1	10	1	2		0	2		0	1	5	1	2		0	2		0	1	1
0	0	5.14286	5.14286	0	0	39	5	5	5	0	0	0	5.47	#NULL!	5.47	2	1	3	4	4	4	4	4	6	6	6	6	7	1	2		0	2		0	2		0	2		0	2		0	2		0	6	5
0	0	4.14286	4.14286	0	1	30	5	4.25	4	0	0	0	4.17	#NULL!	4.17	3	0	2	6	2	6	2	2	4	7	4	5	5	4	2		0	2		0	2		0	2		0	2		0	2		0	4	4
0	0	4.42857	4.42857	0	0	29	1	4.75	3	0	1	1	7.18	#NULL!	7.18	4	1	3	5	4	5	3	3	4	7	6	5	5	4	2		0	2		0	2		0	1	50	0	1	5	1	2		0	4	5
0	0	4.42857	4.42857	0	1	25	3	5	6	0	0	0	3.38	#NULL!	3.38	4	0	5	2	6	2	6	6	6	5	5	5	6	3	2		0	2		0	2		0	2		0	2		0	2		0	5	5
0	0	4.28571	4.28571	0	1	43	1	4.5	5	1	1	2	23.68	#NULL!	23.68	4	0	1	7	6	4	1	4	5	4	5	5	5	3	1	10	1	2		0	2		0	1	5	1	1	100	0	2		0	4	3
0	0	4	4	0	0	21	4	3.25	5	1	0	1	9.07	#NULL!	9.07	4	1	5	2	7	1	6	7	5	5	5	5	2	1	1	10	1	1	25	0	2		0	1	10	0	1	5000	0	1	24	0	4	4
0	0	4.14286	4.14286	0	0	45	3	3.75	3	0	0	0	4.58	#NULL!	4.58	1	0	3	4	2	4	4	4	3	4	4	3	4	4	1	56	0	1	56	0	1	67	0	1	4	0	1	45	0	1	34	0	3	3
0	0	3.71429	3.71429	0	0	53	5	4.25	5	0	0	0	14.18	#NULL!	14.18	2	1	4	4	4	4	4	4	5	5	5	5	5	2	1	20	0	1	3	0	2		0	1	10	0	2		0	2		0	3	4
0	0	4	4	0	1	26	5	4.75	2	2	2	4	52.2	#NULL!	52.2	4	1	1	1	1	7	7	1	6	7	7	6	5	1	1	10	1	1	36	0	1	25	1	1	105	0	1	5	1	1	47	1	4	4
0	0	4	4	0	1	29	5	2.75	4	1	0	1	60	#NULL!	359.98	1	0	4	4	5	4	4	4	5	4	3	5	2	1	1	10	1	2		0	2		0	1	10	0	2		0	2		0	4	4
0	0	4	4	0	1	47	4	3.25	5	2	0	2	12.02	#NULL!	12.02	2	0	4	4	6	4	4	4	4	4	4	4	4	1	1	10	1	1	25	0	1	25	1	1	10	0	2		0	2		0	4	4
0	0	3	3	0	0	26	3	3.25	5	1	0	1	7.12	#NULL!	7.12	1	0	5	4	4	4	4	4	4	4	4	4	4	1	1	10	1	2		0	2		0	1	10	0	1	500	0	2		0	3	3
0	0	3	3	0	0	39	2	4	5	0	0	0	9.15	#NULL!	9.15	1	1	7	4	4	4	4	4	4	4	4	4	5	3	2		0	2		0	2		0	2		0	2		0	2		0	3	3
0	0	3	3	0	0	56	2	3.25	5	0	0	0	42.38	#NULL!	42.38	4	1	4	4	7	4	4	4	4	4	4	4	4	1	2		0	2		0	2		0	2		0	2		0	2		0	3	3
0	0	3	3	0	0	57	3	1.75	5	2	1	3	17.62	#NULL!	17.62	4	0	4	4	7	4	4	4	4	4	1	4	1	1	1	10	1	1	30	1	1	40	0	1	10	0	1	5	1	2		0	3	3
0	0	3	3	0	0	64	4	1	5	0	0	0	17.85	#NULL!	17.85	3	1	1	1	7	7	7	1	1	1	1	1	1	1	2		0	2		0	2		0	2		0	2		0	2		0	3	3
0	0	3	3	0	1	25	5	1	7	0	0	0	60	#NULL!	79.72	1	0	7	7	4	7	1	1	1	1	1	1	1	1	2		0	2		0	2		0	2		0	2		0	2		0	3	3
0	0	3	3	0	1	29	5	4	9	1	0	1	5.42	#NULL!	5.42	2	1	2	6	2	6	2	2	5	5	5	5	5	1	1	10	1	1	25	0	1	75%	0	1	10	0	1	10	0	1	24	0	3	3
0	0	2.71429	2.71429	0	1	32	3	3	5	1	1	2	17.57	#NULL!	17.57	3	0	2	4	5	7	4	1	4	6	6	3	1	1	1	1	0	1	30	1	1	20	0	1	10	0	1	5	1	1	24	0	1	1
0	0	3	3	0	1	35	3	3.25	2	0	0	0	60	#NULL!	71.05	4	1	4	4	4	4	4	4	4	4	4	4	4	1	2		0	2		0	2		0	2		0	2		0	2		0	3	3
0	0	3	3	0	1	38	3	1	5	2	0	2	18.77	#NULL!	18.77	4	0	6	4	7	7	4	1	1	1	1	1	1	1	1	10	1	1	30	1	1	10	0	1	10	0	1	1	0	1	24	0	3	3
0	0	3	3	0	1	38	3	4	5	0	0	0	11.22	#NULL!	11.22	3	1	4	4	4	4	4	4	4	4	4	4	4	4	2		0	2		0	2		0	2		0	2		0	2		0	3	3
0	0	3	3	0	1	44	3	2.5	5	0	0	0	6.03	#NULL!	6.03	1	0	4	4	4	5	4	3	3	3	3	3	3	1	1	1	0	2		0	2		0	2		0	2		0	2		0	3	3
0	0	3	3	0	1	64	3	2	5	0	0	0	13.68	#NULL!	13.68	2	1	4	4	5	4	4	4	3	1	3	3	1	1	2		0	2		0	2		0	2		0	2		0	2		0	3	3
0	0	2	2	0	1	20	3	2.5	5	0	0	0	4.4	#NULL!	4.4	3	1	4	4	7	4	4	4	3	3	3	3	3	1	2		0	2		0	2		0	2		0	2		0	2		0	2	2
0	0	1.57143	1.57143	0	1	26	4	1	2	1	1	2	11.07	#NULL!	11.07	2	0	1	2	6	4	6	4	1	1	1	1	1	1	1	10	1	2		0	2		0	1	5	1	2		0	2		0	2	1
0	0	2.42857	2.42857	0	1	36	4	4.5	5	0	0	0	5.13	#NULL!	5.13	2	1	3	6	3	6	2	2	5	1	4	3	4	5	2		0	1	j	0	2		0	2		0	1	1	0	1	1	0	2	3
0	0	1.14286	1.14286	0	0	74	4	3	5	0	0	0	3.87	#NULL!	3.87	2	0	2	5	1	6	3	2	3	2	2	2	2	5	2		0	2		0	2		0	2		0	2		0	2		0	2	1
0	0	1	1	0	1	20	3	4.75	3	1	0	1	27.32	#NULL!	27.32	4	0	3	5	3	4	3	4	4	4	7	5	5	3	1	10	1	1	23	0	1	23	0	1	20	0	1	100	0	1	24	0	1	1
1	1	6	6	0	1	58	5	1.25	4	2	1	3	60	#NULL!	145.32	3	0	2	2	2	4	6	4	1	7	1	6	1	2	1	10	1	1	30	1	1	30	0	1	10	0	1	5	1	1	24	0	6	6
1	1	6	6	0	1	20	5	5.5	9	0	0	0	3.73	#NULL!	3.73	4	0	7	7	7	1	1	7	7	7	7	7	7	1	2		0	2		0	2		0	2		0	2		0	2		0	6	6
1	1	5	5	0	0	41	5	4	4	0	0	0	60	#NULL!	65.77	2	0	1	3	1	7	5	1	7	7	7	7	1	1	2		0	2		0	2		0	2		0	2		0	2		0	5	5
1	1	3.42857	3.42857	0	1	22	3	2.25	5	1	2	3	54.8	#NULL!	54.8	1	1	5	2	5	5	6	3	3	6	4	4	1	1	1	10	1	1	21	0	1	5	0	1	5	1	1	1	0	1	47	1	3	5
1	1	3	3	0	0	49	3	3.25	5	0	0	0	7.92	#NULL!	7.92	3	0	4	4	4	4	4	4	4	4	4	4	4	1	1	100	0	1	23	0	1	2	0	2		0	2		0	2		0	3	3
1	1	3	3	0	1	35	5	1	3	3	3	6	60	#NULL!	64.17	2	0	1	1	1	4	7	4	1	4	1	3	1	1	1	10	1	1	30	1	1	25	1	1	5	1	1	5	1	1	47	1	3	3
1	1	1.71429	1.71429	0	0	58	4	2.5	4	0	0	0	3.07	#NULL!	3.07	4	1	3	4	1	7	4	1	2	2	2	2	2	4	2		0	2		0	2		0	2		0	2		0	2		0	1	1
1	1	1.28571	1.28571	0	0	28	2	2.75	3	0	0	0	6.12	#NULL!	6.12	1	0	4	4	4	4	4	4	3	1	2	2	3	3	2		0	2		0	2		0	2		0	2		0	1	100	0	1	2
1	1	1	1	0	0	74	4	3.25	6	0	0	0	4.87	#NULL!	4.87	2	1	2	1	3	5	7	3	3	3	2	3	3	5	2		0	2		0	2		0	2		0	2		0	2		0	1	1
0	1	6	6	0	0	43	5	5.5	9	0	0	0	6.42	#NULL!	6.42	3	1	5	3	5	3	5	5	7	7	7	7	7	1	2		0	2		0	2		0	2		0	2		0	2		0	6	6
0	1	6	6	0	0	39	5	3.5	5	0	0	0	14.88	#NULL!	14.88	4	0	2	3	4	7	5	1	5	7	5	5	3	1	1	1	0	1	6	0	1	1	0	1	10	0	1	100	0	1	24	0	6	6
0	1	5.42857	5.42857	0	1	42	5	4.75	4	1	0	1	11.58	#NULL!	11.58	4	0	1	7	5	7	1	1	6	6	6	6	6	1	1	10	1	1	35	0	1	40	0	1	50	0	1	70	0	1	40	0	5	5
0	1	5	5	0	0	67	5	3.75	4	0	1	1	25.12	#NULL!	25.12	4	1	3	4	3	6	4	2	4	4	5	5	5	1	1	1	0	1	16	0	2		0	1	10	0	1	5	1	2		0	5	5
0	1	5	5	0	0	39	5	5.25	7	0	0	0	7.43	#NULL!	7.43	3	0	2	5	2	6	3	2	6	6	5	6	6	4	2		0	2		0	2		0	2		0	2		0	2		0	5	5
0	1	4.57143	4.57143	0	1	27	4	5.75	5	0	0	0	18.07	#NULL!	18.07	1	0	1	7	1	7	1	1	6	6	6	5	6	5	1	100	0	1	10	0	1	10	0	1	10	0	1	10	0	1	24	0	5	5
0	1	4	4	0	0	26	5	4.75	3	3	2	5	50.15	#NULL!	50.15	2	1	1	1	1	7	7	1	7	7	6	6	5	1	1	10	1	1	30	1	1	25	1	1	105	0	1	5	1	1	47	1	4	4
0	1	4	4	0	0	58	4	3.5	5	1	3	4	23	#NULL!	23	4	1	3	4	4	3	4	5	4	2	4	5	3	3	1	100	0	1	30	1	2		0	1	5	1	1	5	1	1	47	1	4	4
0	1	4	4	0	1	67	4	3.25	5	1	2	3	43.42	#NULL!	43.42	3	0	4	2	4	3	6	5	6	3	3	6	2	2	1	10	1	1	25	0	1	20	0	1	10	0	1	5	1	1	47	1	4	4
0	1	4.57143	4.57143	0	1	30	4	4	3	1	0	1	17.13	#NULL!	17.13	1	0	4	4	5	2	4	6	4	6	5	5	4	3	1	10	1	1	45	0	1	20	0	1	10	0	1	500	0	1	24	0	4	4
0	1	3.85714	3.85714	0	1	43	3	4.5	8	0	0	0	10.15	#NULL!	10.15	1	0	4	3	4	7	5	1	4	4	5	4	5	4	2		0	2		0	2		0	2		0	2		0	2		0	3	3
0	1	3.85714	3.85714	0	1	26	3	5	5	1	0	1	6.47	#NULL!	6.47	1	0	3	4	2	7	4	1	5	5	5	5	5	5	1	100	0	1	30	1	2		0	1	10	0	1	100	0	1	22	0	4	4
0	1	3.42857	3.42857	0	1	40	5	3	6	0	0	0	7.43	#NULL!	7.43	2	0	4	4	4	5	4	3	4	4	4	4	3	1	1	1	0	1	25	0	2		0	1	10	0	2		0	2		0	3	3
0	1	3	3	0	0	57	5	3.5	5	0	0	0	5.85	#NULL!	5.85	3	1	4	4	4	4	4	4	4	4	4	4	3	3	1	25	0	2		0	2		0	1	10	0	2		0	1	24	0	3	3
0	1	3	3	0	0	28	3	1	7	0	0	0	20.35	#NULL!	20.35	4	0	6	4	7	7	4	1	1	1	1	1	1	1	1	100	0	2		0	1	40	0	1	10	0	1	100	0	2		0	3	3
0	1	3	3	0	0	26	5	4.5	3	3	2	5	47.35	#NULL!	47.35	1	0	1	1	1	5	7	3	6	7	6	6	5	1	1	10	1	1	30	1	1	25	1	1	105	0	1	5	1	1	47	1	3	3
0	1	3	3	0	0	23	3	3.25	5	2	3	5	6.95	#NULL!	6.95	2	0	4	4	4	4	4	4	4	4	4	4	4	1	1	10	1	1	30	1	1	20	0	1	5	1	1	5	1	1	47	1	3	3
0	1	3	3	0	0	42	5	4	5	0	0	0	12.37	#NULL!	12.37	2	1	5	4	4	2	4	6	4	4	4	4	4	4	2		0	2		0	2		0	2		0	2		0	2		0	3	3
0	1	3.42857	3.42857	0	1	41	2	2.5	9	2	1	3	19.87	#NULL!	19.87	4	0	2	2	7	4	6	4	4	4	4	4	1	1	1	10	1	1	30	1	1	20	0	1	10	0	1	20	0	1	47	1	4	3
0	1	3	3	0	1	25	3	3.5	5	0	0	0	5.68	#NULL!	5.68	3	1	4	4	4	4	4	4	4	4	4	4	4	2	2		0	1	3	0	1	20	0	1	10	0	1	10	0	2		0	3	3
0	1	2.28571	2.28571	0	1	22	3	4.5	5	0	0	0	4.23	#NULL!	4.23	1	0	3	5	3	5	3	3	4	3	5	5	6	3	1	3443	0	1	34	0	1	76	0	1	34	0	1	100	0	1	35	0	1	2
0	1	3	3	0	1	22	3	4.5	5	0	0	0	6.32	#NULL!	6.32	1	1	4	3	3	5	5	3	4	4	4	4	4	6	2		0	2		0	2		0	2		0	2		0	2		0	3	3
0	1	3.14286	3.14286	0	0	34	4	3	3	0	0	0	60	#NULL!	85.6	4	1	1	3	2	1	5	7	3	5	4	4	4	1	1	200	0	1	7	0	1	40	0	1	10	0	1	500	0	1	24	0	3	3
0	1	1	1	0	0	42	5	1	7	0	0	0	14.42	#NULL!	14.42	4	0	7	7	7	4	1	4	1	1	1	1	1	1	1	1	0	2		0	2		0	2		0	2		0	2		0	1	1
0	1	1	1	0	1	20	3	2.5	8	2	1	3	22.07	#NULL!	22.07	3	1	6	1	6	4	7	4	5	4	3	4	1	1	1	10	1	1	30	1	1	40	0	1	5	1	1	100	0	1	24	0	1	1
0	1	3.14286	3.14286	0	1	72	3	6.25	4	0	0	0	5.15	#NULL!	5.15	1	1	3	5	1	6	3	2	7	7	7	7	7	4	1	11	0	1		0	1	22	0	1		0	1		0	1		0	1	4
0	0	4.71429	4.85714	0.142857	0	26	3	2.75	5	0	0	0	6.5	#NULL!	6.5	4	0	4	4	4	1	4	7	4	7	4	3	1	2	2		0	2		0	2		0	2		0	2		0	2		0	5	5
0	1	4.42857	4.57143	0.142857	0	63	5	4.25	7	1	0	1	6.98	#NULL!	6.98	2	0	5	3	5	4	5	4	5	6	5	6	5	2	1	10	1	1	5	0	1	15	0	1	10	0	2		0	2		0	5	5
0	1	4.42857	4.57143	0.142857	0	52	4	3.75	5	0	0	0	18.87	#NULL!	18.87	3	1	4	4	4	7	4	1	4	5	4	6	4	3	1	1	0	2		0	2		0	1	10	0	2		0	2		0	5	4
1	0	3.71429	3.85714	0.142857	0	25	5	3	4	0	0	0	27.93	#NULL!	27.93	3	0	2	3	2	3	5	5	6	2	3	6	2	1	1	1	0	2		0	1	20	0	1	10	0	1	100	0	1	24	0	3	4
1	0	3.28571	3.42857	0.142857	1	75	3	3.25	1	0	0	0	6.8	#NULL!	6.8	1	0	5	7	1	4	1	4	1	2	2	2	3	7	2		0	2		0	1	100	0	2		0	2		0	1	20	0	3	2
0	0	3.71429	3.85714	0.142857	0	57	3	3.5	5	2	0	2	20.88	#NULL!	20.88	4	0	4	1	7	1	7	7	4	1	4	1	4	2	1	10	1	1	30	1	2		0	1	10	0	1	100	0	1	24	0	4	3
0	0	3	3.14286	0.142857	1	52	3	3.5	6	1	0	1	60	#NULL!	81.32	4	1	4	4	4	4	4	4	4	4	4	4	4	2	1	10	1	2		0	2		0	2		0	1	100	0	2		0	4	3
0	0	2.71429	2.85714	0.142857	1	31	3	2.5	9	0	0	0	14.12	#NULL!	14.12	4	0	3	4	7	1	4	7	4	4	4	2	1	1	2		0	2		0	2		0	2		0	2		0	2		0	1	3
0	0	2.85714	3	0.142857	1	36	3	3.5	5	0	0	0	13.72	#NULL!	13.72	1	1	7	3	4	2	5	6	3	1	4	4	4	3	2		0	2		0	2		0	1	210	0	2		0	2		0	1	1
1	1	3.57143	3.71429	0.142857	0	51	3	1.25	7	1	0	1	60	#NULL!	64.47	3	1	3	5	7	4	3	4	2	4	1	4	1	1	1	10	1	1	14	0	1	1	0	1	10	0	1	500	0	1	24	0	3	4
1	1	3.57143	3.71429	0.142857	0	42	5	3.75	5	0	1	1	8.53	#NULL!	8.53	2	1	3	5	4	5	3	3	4	4	4	4	4	3	2		0	2		0	2		0	2		0	1	5	1	2		0	4	4
1	1	3.28571	3.42857	0.142857	1	32	5	4.75	5	2	2	4	47.28	#NULL!	47.28	2	1	6	3	3	5	5	3	6	5	4	5	3	6	1	10	1	2		0	1	25%	1	1	5	1	1	100	0	1	47	1	4	3
1	1	3	3.14286	0.142857	1	42	3	2.5	5	0	0	0	15.88	#NULL!	15.88	1	0	5	4	6	3	4	5	4	4	3	5	2	1	2		0	2		0	2		0	1	10	0	2		0	2		0	4	3
0	1	3.71429	3.85714	0.142857	0	70	3	5.25	5	0	1	1	26.08	#NULL!	26.08	3	1	3	6	5	4	2	4	6	4	6	5	6	3	2		0	2		0	1	50	0	1	10	0	1	5	1	2		0	4	5
0	1	2.57143	2.71429	0.142857	0	33	4	3	3	0	0	0	28.25	#NULL!	28.25	4	0	2	2	2	2	6	6	5	5	5	4	1	1	2		0	2		0	2		0	2		0	2		0	2		0	1	2
0	1	3.14286	3.28571	0.142857	0	58	4	3.25	4	0	0	0	18.62	#NULL!	18.62	1	0	1	2	1	4	6	4	5	4	3	5	4	1	2		0	2		0	2		0	1	10	0	1	100	0	2		0	4	3
0	1	3.71429	3.85714	0.142857	1	30	3	4.5	7	3	1	4	24.98	#NULL!	24.98	2	0	7	5	5	5	3	3	5	5	5	5	5	3	1	10	1	1	30	1	1	25	1	1	10	0	1	20	0	1	47	1	4	4
0	1	3.28571	3.42857	0.142857	0	18	5	3.5	4	0	0	0	8.18	#NULL!	8.18	1	0	1	6	6	4	2	4	5	2	4	4	1	4	1	527	0	1	25	0	2		0	1	25	0	1	100	0	1	24	0	1	6
0	1	3	3.14286	0.142857	0	52	3	3.75	5	0	0	0	21.1	#NULL!	21.1	1	0	5	4	4	4	4	4	4	4	4	4	4	3	2		0	2		0	2		0	2		0	2		0	2		0	3	3
0	1	2.57143	2.71429	0.142857	1	24	5	1.5	2	1	0	1	7.17	#NULL!	7.17	4	0	2	4	3	5	4	3	1	2	3	2	1	1	1	10	1	1	25	0	2		0	1	10	0	1	100	0	2		0	2	3
1	0	3.42857	3.57143	0.142857	1	28	3	3.25	9	2	1	3	16.45	#NULL!	16.45	3	1	7	6	7	2	2	6	4	4	4	4	4	1	1	10	1	1	30	1	2		0	1	10	0	1	5	1	2		0	5	3
1	0	4	4.14286	0.142857	0	29	3	6	5	1	0	1	12.92	#NULL!	12.92	3	1	5	4	2	4	4	4	6	6	6	3	6	6	1	10	1	2		0	2		0	1	10	0	1	100	0	1	24	0	6	3
0	0	3.42857	3.57143	0.142857	1	30	5	2.75	4	2	0	2	6.48	#NULL!	6.48	2	0	2	6	2	5	2	3	3	6	3	6	3	2	1	10	1	1	7	0	1	25%	1	1	10	0	1	100	0	1	24	0	2	1
0	0	3.42857	3.57143	0.142857	1	36	5	2.5	8	1	0	1	22.95	#NULL!	22.95	2	0	6	1	7	7	7	1	4	5	4	2	1	1	1	10	1	1	16	0	1	0,6	0	1	10	0	1	1	0	1	24	0	1	3
1	1	4.28571	4.42857	0.142857	0	53	3	1.75	8	1	2	3	60	#NULL!	2186.65	3	1	6	5	5	4	3	4	1	5	3	5	1	2	1	10	1	1	32	0	1	40	0	1	5	1	1	5	1	1	24	0	3	4
0	1	5	5.14286	0.142857	1	21	3	5	9	2	3	5	9.53	#NULL!	9.53	2	1	2	7	6	6	1	2	6	6	7	5	6	1	1	10	1	1	30	1	1	20	0	1	5	1	1	5	1	1	47	1	6	5
0	1	4	4.14286	0.142857	1	70	3	2.75	3	0	0	0	26.32	#NULL!	26.32	4	1	2	2	4	7	6	1	4	4	3	4	3	1	1	11	0	1	5	0	1	3	0	1	1,1	0	1	20	0	1	24	0	5	5
0	1	4	4.14286	0.142857	1	50	4	4.5	6	2	0	2	24.2	#NULL!	24.2	1	1	5	5	5	5	3	3	5	5	5	5	5	3	1	10	1	1	30	1	1	10	0	1	10	0	1	100	0	1	24	0	4	4
0	1	4	4.14286	0.142857	1	74	4	5.5	3	2	2	4	59.42	#NULL!	59.42	1	1	2	2	3	4	6	4	7	7	7	5	1	7	1	10	1	1	30	1	1	40	0	1	5	1	1	5	1	1	24	0	3	4
0	1	2.42857	2.57143	0.142857	0	57	3	2.5	5	0	0	0	14.57	#NULL!	14.57	1	1	4	7	3	6	1	2	4	4	4	4	1	1	2		0	1	13	0	1	2	0	1	10	0	1	250	0	1	24	0	3	3
1	0	5.42857	5.71429	0.285714	1	24	4	3.75	2	0	0	0	25.12	#NULL!	25.12	2	1	3	1	1	1	7	7	7	7	6	7	1	1	1	1000	0	2		0	2		0	2		0	2		0	2		0	4	4
1	0	5	5.28571	0.285714	1	44	4	3	3	2	2	4	50.37	#NULL!	50.37	3	0	4	5	1	4	3	4	3	4	4	4	3	2	1	10	1	1	25	0	1	25	1	1	10	0	1	5	1	1	47	1	6	6
1	0	3.14286	3.42857	0.285714	1	71	2	1.25	8	1	0	1	51.35	#NULL!	51.35	4	0	5	7	7	1	1	7	2	2	1	2	1	1	1	10	1	2		0	2		0	1	10	0	2		0	2		0	3	3
0	0	3.71429	4	0.285714	1	41	5	1.5	6	2	1	3	36.47	#NULL!	36.47	3	1	5	6	6	6	2	2	2	4	2	4	1	1	1	10	1	1	30	1	1	40	0	1	10	0	1	100	0	1	47	1	5	3
0	0	3.57143	3.85714	0.285714	1	20	3	5	7	0	0	0	3.3	#NULL!	3.3	2	0	3	4	4	4	4	4	5	5	5	4	5	5	2		0	2		0	2		0	2		0	2		0	2		0	3	3
0	0	2.85714	3.14286	0.285714	1	34	4	3.5	5	0	0	0	22.15	#NULL!	22.15	4	1	1	5	1	5	3	3	4	4	4	3	2	4	1	20	0	1	10	0	1	59	0	2		0	2		0	1	20	0	2	2
0	0	2.14286	2.42857	0.285714	0	23	3	3	2	0	1	1	7.78	#NULL!	7.78	3	1	4	6	6	3	2	5	4	2	4	3	2	2	1		0	1	Ja vit inte	0	2		0	1		0	1	5	1	2		0	1	1
0	0	2	2.28571	0.285714	0	37	3	3	3	1	0	1	11.82	#NULL!	11.82	3	0	4	4	4	3	4	5	4	4	4	4	3	1	1	10	1	1	25	0	2		0	1	10	0	2		0	1	24	0	2	2
1	1	5	5.28571	0.285714	0	18	2	5	7	3	0	3	49.53	#NULL!	49.53	1	0	6	4	3	2	4	6	6	5	4	6	4	6	1	10 pers	1	1	30 ggr	1	1	25	1	1	10	0	1	20	0	2		0	6	5
1	1	4	4.28571	0.285714	0	62	3	3.75	3	0	0	0	25.3	#NULL!	25.3	4	0	2	4	1	4	4	4	4	5	4	4	4	3	2		0	2		0	2		0	1	10	0	2		0	2		0	4	4
1	1	4.42857	4.71429	0.285714	1	56	4	4.5	3	3	1	4	43.45	#NULL!	43.45	1	0	1	2	2	3	6	5	7	7	6	7	2	3	1	10	1	1	30	1	1	25	1	1	10	0	1	5	1	1	24	0	4	5
1	1	3.57143	3.85714	0.285714	1	30	5	4.75	4	0	0	0	5.5	#NULL!	5.5	4	1	4	6	2	5	2	3	5	6	5	3	4	5	2		0	2		0	2		0	2		0	2		0	2		0	3	3
1	1	2.57143	2.85714	0.285714	0	74	5	2	3	2	3	5	44.32	#NULL!	44.32	2	0	2	2	1	5	6	3	4	4	2	5	1	1	1	10	1	1	30	1	1	40	0	1	5	1	1	5	1	1	47	1	3	2
0	1	5.42857	5.71429	0.285714	0	32	3	3.75	5	0	0	0	41.07	#NULL!	41.07	2	1	4	4	4	4	4	4	4	4	4	4	4	3	2		0	2		0	2		0	2		0	2		0	2		0	4	4
0	1	4.57143	4.85714	0.285714	1	71	5	3.25	6	1	0	1	21.98	#NULL!	21.98	2	0	6	6	6	7	2	1	4	4	4	4	4	1	1	10	1	1	25	0	1	33	0	1	10	0	1	100	0	1	24	0	5	5
0	1	4.28571	4.57143	0.285714	0	18	3	3.25	4	0	0	0	5.27	#NULL!	5.27	2	1	5	3	6	4	5	4	1	1	2	6	5	5	1	4	0	1	65	0	1	33	0	2		0	1	77	0	2		0	4	2
1	0	3.85714	4.14286	0.285714	0	26	2	1.75	7	0	0	0	10.45	#NULL!	10.45	3	1	2	6	6	4	2	4	1	5	2	1	2	2	2		0	2		0	2		0	2		0	2		0	2		0	4	2
0	0	3.85714	4.14286	0.285714	1	50	2	2	8	0	0	0	29.2	#NULL!	29.2	2	0	2	7	7	7	1	1	4	4	2	1	1	1	2		0	1	35	0	2		0	1	10	0	2		0	2		0	5	3
0	0	3.28571	3.57143	0.285714	1	26	3	2.5	2	1	0	1	15.28	#NULL!	15.28	4	1	3	5	3	5	3	3	4	4	2	3	3	1	1	10	1	2		0	2		0	2		0	2		0	2		0	3	2
1	1	3.85714	4.14286	0.285714	0	73	5	3.5	5	0	0	0	27.92	#NULL!	27.92	4	0	2	5	2	3	3	5	4	5	4	5	3	3	2		0	2		0	2		0	1	10	0	1	100	0	2		0	4	3
1	1	3.42857	3.71429	0.285714	0	34	3	2.5	6	0	0	0	30.12	#NULL!	30.12	1	0	4	4	6	4	4	4	4	5	4	5	1	1	2		0	2		0	1	100	0	2		0	1	100	0	1	24	0	2	3
1	1	3.85714	4.14286	0.285714	1	55	5	2.5	6	1	0	1	47.6	#NULL!	47.6	1	1	4	4	5	5	4	3	4	4	4	3	1	1	1	10	1	1	25	0	1	20	0	2		0	1	100	0	1	24	0	4	3
0	1	3.85714	4.14286	0.285714	0	43	3	4	9	0	0	0	24.43	#NULL!	24.43	1	1	2	6	5	6	2	2	4	4	4	4	5	3	2		0	2		0	1	50	0	1	10	0	1	5000	0	1	24	0	3	3
0	1	3.42857	3.71429	0.285714	0	34	4	5.5	3	0	0	0	14.75	#NULL!	14.75	3	0	7	2	1	6	6	2	7	7	7	7	7	1	2		0	2		0	2		0	2		0	2		0	2		0	1	3
0	1	3.28571	3.57143	0.285714	0	65	3	3.5	5	0	0	0	22.97	#NULL!	22.97	3	1	3	7	7	5	1	3	4	4	4	5	4	2	2		0	2		0	2		0	1	10	0	1	100	0	2		0	5	3
0	1	3.42857	3.71429	0.285714	1	68	2	2.5	9	0	0	0	15.52	#NULL!	15.52	3	0	5	7	4	4	1	4	4	4	4	5	1	1	2		0	2		0	2		0	1	10	0	2		0	2		0	3	4
0	1	3.85714	4.14286	0.285714	1	31	4	4.5	6	1	0	1	60	#NULL!	122.42	3	0	4	6	5	4	2	4	4	3	5	4	5	4	1	10	1	1	50%	0	2		0	1	10	0	1	100	0	2		0	3	5
0	1	4.85714	5.14286	0.285714	1	46	5	6.5	6	1	1	2	60	#NULL!	86.35	4	0	5	6	6	2	2	6	6	6	7	6	7	6	1	10	1	1	5	0	1	15	0	1	10	0	1	5	1	1	24	0	5	5
1	0	4.14286	4.57143	0.428571	0	18	2	3	2	2	0	2	19.4	#NULL!	19.4	4	0	1	1	4	6	7	2	5	4	5	1	1	1	1	10	1	1	30	1	2		0	1	10	0	1	100	0	1	24	0	5	5
1	1	5.14286	5.57143	0.428571	0	67	3	5.5	5	0	0	0	23.38	#NULL!	23.38	1	0	3	4	4	4	4	4	5	5	5	5	5	7	2		0	2		0	2		0	1	10	0	2		0	2		0	3	4
0	1	5.14286	5.57143	0.428571	1	28	5	5.5	3	0	0	0	8.23	#NULL!	8.23	3	0	1	6	3	5	2	3	5	6	6	5	5	6	2		0	1	5	0	1	100	0	2		0	2		0	1	16	0	3	3
0	0	3.57143	4	0.428571	0	26	5	4.75	3	0	0	0	3.85	#NULL!	3.85	1	0	5	3	2	4	5	4	5	4	6	5	2	6	2		0	2		0	2		0	2		0	2		0	2		0	6	3
0	0	3.57143	4	0.428571	1	28	3	4	4	0	0	0	6.42	#NULL!	6.42	1	0	3	4	4	5	4	3	4	3	4	3	4	4	2		0	2		0	2		0	2		0	2		0	2		0	4	3
0	0	2.85714	3.28571	0.428571	0	23	3	3	5	0	0	0	21.97	#NULL!	21.97	2	0	4	4	4	4	4	4	4	4	5	4	2	1	2		0	2		0	2		0	1	10	0	1	100	0	1	24	0	3	3
0	0	2.71429	3.14286	0.428571	1	23	3	3.5	3	0	0	0	7.07	#NULL!	7.07	4	1	3	5	4	5	3	3	5	3	2	3	6	1	2		0	2		0	2		0	2		0	1	100	0	2		0	3	1
1	1	2.71429	3.14286	0.428571	1	46	5	1	4	2	2	4	60	#NULL!	114.08	1	1	1	6	6	6	2	2	1	5	1	4	1	1	1	10	1	1	30	1	1	20	0	1	10	0	1	5	1	1	47	1	3	2
1	1	2	2.42857	0.428571	1	38	4	2.25	3	2	0	2	14.17	#NULL!	14.17	4	1	3	4	2	5	4	3	5	4	2	6	1	1	1	10	1	1	30	1	1	10	0	1	10	0	1	100	0	1	24	0	3	2
0	1	3.85714	4.28571	0.428571	1	27	4	6.25	1	0	0	0	57.45	#NULL!	57.45	2	1	3	4	3	7	4	1	7	4	4	7	7	7	1	1	0	1	15	0	1	30	0	1	10	0	1	100	0	1	24	0	2	3
0	1	3.57143	4	0.428571	0	73	3	4.25	3	0	0	0	20.5	#NULL!	20.5	2	0	2	1	4	5	7	3	5	5	5	4	4	3	1	100	0	2		0	2		0	1	10	0	2		0	2		0	5	3
0	1	3	3.42857	0.428571	1	58	3	3.25	6	1	0	1	5.93	#NULL!	5.93	4	1	4	4	1	7	4	1	2	1	3	5	4	4	1	10	1	1	2	0	1	4	0	1	1	0	1	2	0	1	6	0	1	2
0	1	3	3.42857	0.428571	1	26	4	3	5	0	0	0	4.42	#NULL!	4.42	1	0	4	4	4	4	4	4	2	5	1	3	4	5	1	100	0	1	190	0	1	50	0	1	1	0	1	1	0	1	1	0	1	2
0	1	3.57143	4	0.428571	1	67	4	1.5	3	2	1	3	31.62	#NULL!	31.62	4	0	2	2	3	7	6	1	1	1	1	4	1	3	1	10	1	1	30	1	1	40	0	1	10	0	1	5	1	1	24	0	6	4
0	1	2.85714	3.28571	0.428571	0	67	2	2	2	2	0	2	35.07	#NULL!	35.07	3	0	1	1	1	7	7	1	4	4	2	4	1	1	1	10	1	1	30	1	1	10	0	1	10	0	1	20	0	1	5	0	4	3
0	1	2	2.42857	0.428571	1	72	5	1.75	5	2	3	5	27.22	#NULL!	27.22	2	0	4	3	4	6	5	2	2	2	2	4	1	2	1	10	1	1	25	0	1	25	1	1	5	1	1	5	1	1	47	1	3	2
0	0	3.28571	3.71429	0.428571	0	57	3	2.5	5	0	0	0	23.93	#NULL!	23.93	4	0	4	3	6	7	5	1	4	4	4	4	1	1	1	100	0	1	25	0	1	2	0	1	10	0	2		0	1	24	0	6	3
0	0	2.14286	2.57143	0.428571	0	52	3	2.25	5	0	0	0	17.6	#NULL!	17.6	2	1	4	4	4	4	4	4	3	3	3	3	1	2	2		0	2		0	2		0	2		0	2		0	2		0	1	2
1	1	4.57143	5	0.428571	0	56	4	6.5	5	0	1	1	60	#NULL!	72.1	2	1	3	3	2	2	5	6	7	7	6	7	7	6	1	1oo	0	2		0	1	40	0	1	10	0	1	20	0	1	47	1	6	4
1	1	4.57143	5	0.428571	1	41	3	1.5	7	3	3	6	17.72	#NULL!	17.72	4	1	5	5	5	2	3	6	2	6	2	6	1	1	1	10	1	1	30	1	1	25	1	1	5	1	1	5	1	1	47	1	4	4
1	1	3.14286	3.57143	0.428571	0	74	4	3.25	3	0	0	0	32.35	#NULL!	32.35	1	1	1	1	2	7	7	1	5	5	4	5	1	3	2		0	2		0	2		0	1	10	0	2		0	2		0	3	2
1	1	3.28571	3.71429	0.428571	0	55	5	2	1	1	1	2	13	#NULL!	13	4	1	1	1	1	6	7	2	3	3	1	5	1	3	1	10	1	1	25	0	1	30	0	1	10	0	1	100	0	1	47	1	2	2
0	1	4.85714	5.28571	0.428571	0	32	2	2.5	2	1	0	1	22.63	#NULL!	22.63	3	1	4	4	4	1	4	7	1	7	7	1	1	1	1	10	1	1	25	0	1	2	0	1	10	0	1	1250	0	1	24	0	6	3
0	1	3.71429	4.14286	0.428571	1	21	2	5.25	3	0	0	0	9.65	#NULL!	9.65	3	0	3	6	1	2	2	6	7	5	7	6	5	2	1	100	0	1	25	0	1	1 av fem	0	1	10	0	2		0	2		0	4	4
0	1	2.14286	2.57143	0.428571	1	19	3	1.25	5	1	0	1	14.9	#NULL!	14.9	3	1	3	5	4	5	3	3	1	2	2	1	1	1	1	10%	1	2		0	2		0	2		0	1	100	0	1	24	0	1	1
0	1	2.28571	2.71429	0.428571	1	27	3	1.25	6	1	0	1	21.65	#NULL!	21.65	3	1	1	2	1	6	6	2	1	2	1	2	1	2	1	10	1	1	25	0	1	35	0	2		0	2		0	2		0	2	4
1	0	5.42857	6	0.571429	1	68	3	6.5	7	0	1	1	31.1	#NULL!	31.1	1	1	2	1	7	7	7	1	7	7	7	6	6	6	1	100	0	2		0	1	10	0	1	10	0	1	5	1	1	24	0	6	5
1	0	4	4.57143	0.571429	0	64	3	3.25	6	1	1	2	60	#NULL!	74.88	1	0	5	4	4	5	4	3	6	6	5	7	1	1	1	10	1	2		0	1	10	0	1	10	0	1	5	1	2		0	5	5
0	0	4	4.57143	0.571429	0	24	3	3	5	1	1	2	17.1	#NULL!	17.1	3	0	6	2	2	4	6	4	4	4	5	4	2	1	2		0	1	30	1	2		0	2		0	1	5	1	2		0	3	4
0	0	2.85714	3.42857	0.571429	0	27	3	2.5	6	1	0	1	6.7	#NULL!	6.7	4	1	5	5	3	3	3	5	2	3	2	3	3	3	1	10	1	1	5	0	1	20	0	1	10	0	1	1000	0	2		0	2	2
1	1	4.42857	5	0.571429	1	51	3	4.75	8	0	0	0	42.98	#NULL!	42.98	2	1	6	6	5	5	2	3	5	3	5	6	6	3	1	25	0	1	15	0	2		0	2		0	1	100	0	1	12	0	5	3
1	1	4.28571	4.85714	0.571429	1	28	4	6	4	2	1	3	47.78	#NULL!	47.78	4	1	1	5	3	6	3	2	6	5	6	6	6	6	1	10	1	1	30	1	1	10	0	1	5	1	1	100	0	1	32	0	4	4
1	1	2.85714	3.42857	0.571429	0	52	3	2.75	4	0	0	0	19.92	#NULL!	19.92	1	0	4	4	2	7	4	1	5	4	4	6	1	1	1	100	0	2		0	2		0	1	10	0	1	100	0	2		0	3	3
1	1	4.14286	4.71429	0.571429	1	51	4	2.5	6	2	2	4	20.53	#NULL!	20.53	2	1	4	4	5	4	4	4	2	5	3	3	2	3	1	10	1	1	30	1	1	40	0	1	10	0	1	5	1	1	47	1	5	4
1	1	4.71429	5.28571	0.571429	0	62	2	6	5	0	0	0	24.63	#NULL!	24.63	1	0	1	7	6	3	1	5	4	7	7	1	7	6	1	1	0	1	23	0	1	1	0	2		0	2		0	1	24	0	6	6
0	1	4.42857	5	0.571429	1	62	2	2.75	7	0	0	0	21.03	#NULL!	21.03	2	1	3	3	5	6	5	2	4	4	4	3	2	1	1	100	0	1	25	0	1	75	0	1	10	0	1	100	0	1	24	0	5	5
0	1	4.14286	4.71429	0.571429	0	26	5	5	6	2	3	5	57.27	#NULL!	57.27	1	1	5	4	2	4	4	4	7	6	6	5	2	5	1	1%	0	1	30	1	1	25	1	1	5	1	1	5	1	1	47	1	5	5
0	1	4.14286	4.71429	0.571429	1	45	4	5.5	4	0	0	0	5.63	#NULL!	5.63	3	0	2	7	2	6	1	2	7	6	5	7	6	4	1	11	0	1	3	0	1	133	0	1	1222	0	1	100	0	1	2	0	5	4
0	1	3.71429	4.28571	0.571429	1	56	3	1.25	5	1	0	1	27.33	#NULL!	27.33	1	1	4	4	3	4	4	4	1	1	2	1	1	1	1	10	1	2		0	1	50	0	1	10	0	1	1	0	1	24	0	5	5
0	1	4.14286	4.71429	0.571429	1	63	5	4.25	6	1	0	1	18.2	#NULL!	18.2	1	0	6	1	6	6	7	2	5	5	5	5	4	3	1	10	1	1	20	0	2		0	2		0	2		0	2		0	6	5
0	1	4.28571	4.85714	0.571429	1	20	3	2.5	6	1	1	2	7.38	#NULL!	7.38	2	1	2	6	2	6	2	2	3	2	1	1	2	4	1	10	1	1	3	0	1	30	0	1	5	1	1	100	0	1	24	0	2	1
1	0	3.57143	4.14286	0.571429	0	21	3	3.75	7	3	2	5	60	#NULL!	69.42	1	0	7	2	4	6	6	2	3	6	1	3	7	4	1	10	1	1	30	1	1	25	1	1	5	1	1	100	0	1	47	1	3	3
1	0	3	3.57143	0.571429	1	19	4	1	7	3	2	5	56.73	#NULL!	56.73	2	1	6	2	5	6	6	2	1	6	1	1	1	1	1	10	1	1	ca:30	1	1	25	1	1	5	1	1	100	0	1	47	1	4	4
0	0	3.57143	4.14286	0.571429	0	36	2	3.5	7	0	0	0	11.6	#NULL!	11.6	1	0	7	4	7	3	4	5	6	4	4	4	1	3	2		0	2		0	2		0	2		0	2		0	2		0	3	3
0	0	3	3.57143	0.571429	0	52	3	2.75	5	0	0	0	37.6	#NULL!	37.6	4	0	4	7	6	4	1	4	3	5	5	1	1	2	2		0	2		0	2		0	2		0	2		0	2		0	4	3
0	0	2.28571	2.85714	0.571429	0	20	1	4	1	0	0	0	10.58	#NULL!	10.58	4	0	3	4	1	5	4	3	5	5	3	5	3	5	2		0	2		0	2		0	1	10	0	2		0	2		0	2	3
1	1	3.14286	3.71429	0.571429	0	65	3	3.5	6	0	0	0	34.48	#NULL!	34.48	4	1	3	4	3	6	4	2	4	4	4	5	4	2	2		0	2		0	2		0	2		0	2		0	2		0	5	2
1	1	3	3.57143	0.571429	1	42	4	1	7	3	0	3	27.92	#NULL!	27.92	3	1	7	2	3	7	6	1	1	1	1	1	1	1	1	10	1	1	30	1	1	25	1	1	10	0	1	100	0	1	24	0	6	3
0	1	3.42857	4	0.571429	0	69	2	3.75	6	0	0	0	29.17	#NULL!	29.17	4	0	2	7	4	7	1	1	4	4	5	4	4	2	2		0	2		0	2		0	2		0	2		0	1	24	0	2	3
1	1	4.57143	5.14286	0.571429	0	71	5	4.5	4	2	1	3	48.6	#NULL!	48.6	4	0	2	2	2	4	6	4	5	6	5	6	5	3	1	10	1	1	5	0	1	25	1	1	10	0	1	5	1	1	24	0	5	4
1	1	4.14286	4.85714	0.714286	1	58	3	4.25	6	1	0	1	20.72	#NULL!	20.72	3	1	3	5	4	5	3	3	4	4	5	5	5	3	1	10	1	1	22	0	2		0	1	10	0	1	1	0	1	24	0	5	3
1	1	4.14286	4.85714	0.714286	0	69	3	5	4	0	0	0	30.9	#NULL!	30.9	3	0	2	2	2	2	6	6	5	6	6	5	5	4	2		0	2		0	2		0	1	10	0	1	500	0	1	24	0	5	5
0	1	4.14286	4.85714	0.714286	0	63	3	2.5	8	0	0	0	39.4	#NULL!	39.4	3	1	6	6	7	7	2	1	4	5	4	4	1	1	2		0	2		0	2		0	1	10	0	1	100	0	2		0	2	3
1	0	3.57143	4.28571	0.714286	0	75	5	4.75	9	0	0	0	3.92	#NULL!	3.92	1	1	7	5	7	2	3	6	4	4	4	4	4	7	2		0	2		0	2		0	2		0	2		0	2		0	5	1
0	0	3.57143	4.28571	0.714286	1	58	2	4.5	5	0	0	0	25.18	#NULL!	25.18	2	0	4	7	7	7	1	1	5	4	5	4	5	3	1	100	0	1	20	0	1	30	0	1	10	0	1	50	0	1	24	0	6	6
1	1	2.71429	3.42857	0.714286	1	33	3	2.75	6	0	0	0	20.22	#NULL!	20.22	1	0	3	3	3	6	5	2	3	3	2	2	3	3	1	100	0	1	5	0	1	200	0	1	10	0	1	500	0	1	48	0	3	2
0	1	2.57143	3.28571	0.714286	1	20	3	3	4	0	0	0	5.53	#NULL!	5.53	2	1	2	3	4	4	5	4	2	3	3	3	4	3	1	100	0	2		0	1	5	0	2		0	2		0	1	10	0	3	3
0	0	1.28571	2	0.714286	0	53	3	1	5	0	1	1	25.18	#NULL!	25.18	3	0	5	1	4	5	7	3	1	1	1	1	1	1	1	1	0	1	25	0	1	40	0	1	10	0	1	5	1	1	24	0	1	3
0	1	1.57143	2.28571	0.714286	1	45	5	2.25	7	3	3	6	19.15	#NULL!	19.15	2	0	6	5	7	5	3	3	5	4	2	5	1	1	1	10	1	1	30	1	1	25	1	1	5	1	1	5	1	1	47	1	3	2
0	0	2.28571	3	0.714286	1	29	3	2.5	4	0	1	1	14.43	#NULL!	14.43	3	1	4	4	4	4	4	4	3	4	3	4	3	1	2		0	2		0	2		0	1	5	1	2		0	1	12	0	3	1
0	0	2.85714	3.57143	0.714286	0	44	3	4.25	2	0	0	0	6.5	#NULL!	6.5	1	0	6	2	3	6	6	2	4	4	4	4	4	5	2		0	2		0	2		0	2		0	2		0	2		0	3	3
0	0	2	2.71429	0.714286	1	50	2	3.25	4	0	0	0	23.73	#NULL!	23.73	2	0	1	6	7	7	2	1	5	5	5	5	1	2	2		0	2		0	2		0	1	10	0	1	100	0	2		0	2	2
0	0	2.14286	2.85714	0.714286	1	32	4	5	7	3	0	3	60	#NULL!	68.68	4	0	5	7	6	4	1	4	5	4	5	3	5	5	1	10	1	1	30	1	1	25	1	1	10	0	1	100	0	1	24	0	3	2
1	1	4.71429	5.42857	0.714286	0	53	3	5.75	5	0	0	0	60	#NULL!	62.28	1	0	1	7	1	1	1	7	5	5	5	4	6	7	2		0	2		0	1	50%	0	2		0	2		0	2		0	6	4
1	1	4	4.71429	0.714286	0	64	5	5.75	3	1	0	1	28.95	#NULL!	28.95	2	0	2	2	2	7	6	1	6	6	6	6	5	6	1	10	1	2		0	2		0	1	10	0	2		0	1	24	0	3	3
1	1	3.14286	3.85714	0.714286	0	60	4	6.25	5	0	0	0	27.12	#NULL!	27.12	3	0	4	4	5	4	4	4	6	5	5	4	7	7	1	100	0	2		0	2		0	1	10	0	1	100	0	1	24	0	4	3
1	1	3.14286	3.85714	0.714286	0	61	5	4.75	6	2	3	5	44.63	#NULL!	44.63	3	1	4	4	2	6	4	2	4	4	4	4	5	6	1	10	1	1	25	0	1	25	1	1	5	1	1	5	1	1	47	1	3	3
1	1	3.14286	3.85714	0.714286	0	61	3	5	5	1	0	1	47.4	#NULL!	47.4	2	1	4	4	5	5	4	3	6	6	6	5	5	3	1	10 st	1	1	25	0	1	30	0	1	10	0	1	100	0	1	12	0	5	3
1	1	3	3.71429	0.714286	0	74	4	3.25	7	0	0	0	23.78	#NULL!	23.78	1	0	5	2	1	5	6	3	6	4	4	5	2	1	2		0	1	9	0	2		0	1	10	0	2		0	1	24	0	5	3
1	1	3	3.71429	0.714286	0	68	3	3.25	5	1	0	1	24.45	#NULL!	24.45	1	1	1	2	4	2	6	6	4	3	4	3	4	1	1	10	1	1	5	0	2		0	1	10	0	1	100	0	1	24	0	3	3
1	1	2.14286	2.85714	0.714286	0	48	4	2	7	1	1	2	44.72	#NULL!	44.72	1	1	6	6	6	4	2	4	1	5	5	1	1	1	1	10	1	1	25	0	1	30	0	1	10	0	1	5	1	1	24	0	3	2
1	1	2.28571	3	0.714286	1	56	3	2.25	3	1	1	2	22.3	#NULL!	22.3	1	1	2	7	7	7	1	1	2	5	2	1	3	2	1	10	1	2		0	1	40	0	1	10	0	1	5	1	1	24	0	4	2
1	1	2	2.71429	0.714286	1	41	4	1	7	3	1	4	60	#NULL!	70.8	3	1	6	6	5	6	2	2	1	2	1	5	1	1	1	10	1	1	30	1	1	25	1	1	10	0	1	5	1	1	24	0	3	2
0	1	5.28571	6	0.714286	0	64	5	2.5	3	1	0	1	40.6	#NULL!	40.6	4	1	1	4	1	7	4	1	4	4	4	4	1	1	1	10	1	2		0	1	10	0	1	10	0	1	100	0	2		0	6	3
0	1	4.42857	5.14286	0.714286	0	43	5	4	5	0	0	0	16.27	#NULL!	16.27	4	0	4	6	4	6	2	2	4	7	7	5	4	1	2		0	2		0	2		0	2		0	2		0	2		0	6	5
0	1	3.71429	4.42857	0.714286	0	59	3	3	6	1	0	1	60	#NULL!	78.58	3	1	6	5	3	5	3	3	4	5	4	5	3	1	1	10	1	1	24	0	1	4	0	1	10	0	1	100	0	2		0	5	3
0	1	3.28571	4	0.714286	0	29	5	4	6	1	0	1	57.72	#NULL!	57.72	1	0	3	6	1	6	2	2	5	4	5	5	3	3	1	10	1	1	25	0	1	40	0	1	10	0	1	100	0	1	24	0	5	4
0	1	3	3.71429	0.714286	1	68	1	6	5	0	0	0	32.32	#NULL!	32.32	3	1	1	4	1	4	4	4	5	4	5	5	7	7	1	50	0	1	3	0	2		0	1	10	0	1	100	0	1	24	0	3	3
0	1	2.85714	3.57143	0.714286	0	54	5	4.75	5	0	0	0	60	#NULL!	83.73	2	1	4	4	4	4	4	4	4	5	5	4	5	5	1	500	0	1	7	0	1	39	0	1	10	0	1	60	0	1	50	0	3	3
0	1	3	3.71429	0.714286	1	41	3	2	5	3	3	6	26.73	#NULL!	26.73	2	0	5	3	2	6	5	2	2	5	4	5	1	1	1	10	1	1	30	1	1	25	1	1	5	1	1	5	1	1	47	1	3	2
0	1	3.28571	4	0.714286	1	32	3	2.25	5	0	0	0	20.87	#NULL!	20.87	2	0	4	4	6	4	4	4	2	5	4	4	2	1	1	1	0	1	25	0	1	33	0	1	10	0	2		0	1	24	0	5	5
0	1	3	3.71429	0.714286	1	35	4	3.25	4	0	0	0	9.27	#NULL!	9.27	4	1	2	3	5	4	5	4	3	3	4	3	2	4	1	3000	0	1	4	0	1	40	0	1	70	0	1	3	0	1	17	0	2	2
0	0	4.14286	5	0.857143	0	73	3	2.5	8	0	0	0	39.67	#NULL!	39.67	4	0	7	6	7	6	2	2	4	7	4	7	1	1	2		0	2		0	2		0	2		0	2		0	2		0	1	3
0	0	4.42857	5.28571	0.857143	0	66	5	3.25	5	0	0	0	34.9	#NULL!	34.9	3	0	2	3	2	5	5	3	5	4	5	5	2	1	1	1	0	2		0	2		0	2		0	2		0	2		0	5	4
1	1	4.14286	5	0.857143	0	42	3	3.25	4	1	0	1	15.73	#NULL!	15.73	2	0	2	2	6	3	6	5	4	5	4	6	2	3	1	10	1	1	5	0	2		0	1	10	0	1	100	0	1	24	0	4	5
0	1	4	4.85714	0.857143	0	71	2	5	5	1	0	1	16.5	#NULL!	16.5	2	0	6	5	7	6	3	2	6	5	6	3	5	3	1	10	1	2		0	2		0	2		0	2		0	2		0	6	4
0	1	3.71429	4.57143	0.857143	1	22	1	4	6	0	1	1	6.05	#NULL!	6.05	1	0	5	5	5	3	3	5	5	6	4	4	3	4	2		0	1	34	0	1	50	0	1	10	0	1	5	1	1	18	0	4	2
1	0	3.14286	4	0.857143	1	23	4	2.25	4	2	1	3	16.6	#NULL!	16.6	2	0	4	4	3	3	4	5	3	4	4	4	1	1	1	10	1	1	Typ 30	1	1	30	0	1	10	0	1	1	0	1	47	1	4	3
1	0	2	2.85714	0.857143	1	39	5	2.25	4	2	2	4	37.12	#NULL!	37.12	1	1	1	2	5	6	6	2	3	5	3	3	2	1	1	10	1	1	30	1	1	10	0	1	5	1	1	5	1	1	24	0	3	2
0	0	2.71429	3.57143	0.857143	0	41	3	3.75	5	1	0	1	9.68	#NULL!	9.68	3	1	4	4	4	1	4	7	5	5	4	5	5	1	1	10	1	1	25	0	2		0	2		0	2		0	2		0	5	2
0	0	3.42857	4.28571	0.857143	1	24	3	2.5	6	0	3	3	18.2	#NULL!	18.2	3	1	2	3	5	7	5	1	3	2	3	2	3	1	1	100	0	2		0	2		0	1	5	1	1	5	1	1	47	1	4	4
0	0	2.28571	3.14286	0.857143	1	35	3	5.25	5	0	1	1	33.38	#NULL!	33.38	1	1	4	4	3	5	4	3	5	4	5	5	6	5	1	100	0	2		0	2		0	1	10	0	1	5	1	2		0	3	2
0	0	3	3.85714	0.857143	1	48	3	3.25	3	1	1	2	16.15	#NULL!	16.15	1	0	5	4	4	4	4	4	4	4	4	5	3	2	1	10	1	1	25	0	1	20	0	1	10	0	1	5	1	1	24	0	4	3
0	0	2.42857	3.28571	0.857143	0	19	3	2.5	5	1	0	1	14.87	#NULL!	14.87	3	1	5	2	2	4	6	4	5	4	2	5	2	1	1	10	1	2		0	2		0	1	10	0	1	100	0	1	24	0	4	3
1	1	3.85714	4.71429	0.857143	0	39	5	4.75	5	2	0	2	33.78	#NULL!	33.78	4	0	1	6	6	2	2	6	4	4	5	3	4	6	1	10	1	1	30	1	2		0	1	10	0	2		0	2		0	3	3
1	1	3.14286	4	0.857143	0	52	3	2.75	4	2	0	2	26.87	#NULL!	26.87	1	1	2	4	2	4	4	4	2	4	5	4	2	2	1	10	1	1	30	1	2		0	1	10	0	1	100	0	2		0	3	2
1	1	2.85714	3.71429	0.857143	1	27	5	1.5	4	1	1	2	13.88	#NULL!	13.88	4	1	3	3	2	5	5	3	2	1	1	5	2	1	1	10	1	2		0	1	1	0	1	95	0	2		0	1	47	1	3	4
1	1	2.85714	3.71429	0.857143	1	62	3	3.5	2	1	0	1	60	#NULL!	114.62	3	0	2	4	3	6	4	2	4	4	4	5	4	2	1	100	0	1	25	0	1	25	1	1	10	0	1	100	0	1	24	0	4	2
1	1	2	2.85714	0.857143	0	57	4	3.25	5	0	0	0	27.27	#NULL!	27.27	2	1	4	3	3	4	5	4	4	4	4	4	2	3	1	1	0	1	25	0	1	10	0	1	10	0	2		0	1	24	0	6	1
1	1	3	3.85714	0.857143	0	68	3	2.5	5	0	0	0	17.15	#NULL!	17.15	4	1	4	4	4	4	4	4	4	5	4	4	1	1	2		0	2		0	2		0	2		0	2		0	2		0	4	3
0	1	3.14286	4	0.857143	1	19	3	3.25	6	1	1	2	17.12	#NULL!	17.12	3	1	6	3	4	5	5	3	4	5	4	3	3	2	1	10	1	1	25	0	2		0	1	10	0	1	5	1	2		0	3	2
0	1	3.14286	4	0.857143	1	39	3	3.75	4	0	0	0	3.93	#NULL!	3.93	2	1	2	6	2	6	2	2	4	4	3	4	4	4	1	1000	0	1	50	0	1	50	0	1	100	0	1	50	0	1	10	0	3	3
0	0	4.28571	5.14286	0.857143	1	33	5	3.75	5	1	0	1	19.82	#NULL!	19.82	2	0	4	4	1	6	4	2	4	7	7	7	1	3	1	0,1	0	1	30	1	1	40	0	1	10	0	1	100	0	1	24	0	6	4
1	1	4.28571	5.14286	0.857143	0	50	3	4	8	1	1	2	37.32	#NULL!	37.32	3	1	5	3	5	4	5	4	7	7	7	6	1	1	1	100	0	1	30	1	1	2,5	0	1	10	0	1	250	0	1	47	1	1	3
1	1	4.85714	5.71429	0.857143	0	61	5	5.75	7	0	0	0	25.27	#NULL!	25.27	4	0	2	6	4	4	2	4	5	5	7	1	7	4	2		0	2		0	2		0	1	10	0	1	100	0	2		0	5	3
1	1	4.57143	5.42857	0.857143	1	22	4	2.5	6	3	2	5	44.7	#NULL!	44.7	1	1	5	2	3	6	6	2	5	3	2	5	1	2	1	10	1	1	30	1	1	25	1	1	10	0	1	5	1	1	47	1	6	5
0	1	3.28571	4.14286	0.857143	1	21	4	3.5	3	3	3	6	29.15	#NULL!	29.15	2	0	3	2	1	4	6	4	5	5	5	4	3	1	1	10	1	1	30	1	1	25	1	1	5	1	1	5	1	1	47	1	4	4
0	0	3.57143	4.57143	1	1	68	3	1	9	1	0	1	54.58	#NULL!	54.58	2	0	6	7	7	7	1	1	1	6	1	1	1	1	1	10	1	1	35	0	1	33	0	1	10	0	2		0	2		0	6	3
0	1	3.57143	4.57143	1	0	33	3	2.75	4	0	0	0	7.57	#NULL!	7.57	4	0	4	5	5	6	3	2	4	2	4	4	1	2	2		0	1	3	0	2		0	2		0	2		0	2		0	3	2
1	1	1.42857	2.42857	1	0	49	3	3.5	8	1	2	3	23.32	#NULL!	23.32	4	1	6	6	6	4	2	4	5	4	2	6	5	2	1	10	1	2		0	1	10	0	1	9	0	1	5	1	1	47	1	1	1
1	0	4.42857	5.42857	1	0	68	2	4.75	5	3	0	3	24.88	#NULL!	24.88	3	0	4	4	4	4	4	4	5	6	6	5	5	3	1	10	1	1	30	1	1	25	1	1	10	0	1	50	0	1	24	0	5	5
1	0	4.42857	5.42857	1	1	69	5	3	5	1	0	1	22.28	#NULL!	22.28	2	1	2	3	5	3	5	5	5	5	5	6	1	1	1	10	1	1	25	0	2		0	2		0	2		0	2		0	6	5
1	0	2.85714	3.85714	1	0	22	3	3	3	1	1	2	31.27	#NULL!	31.27	4	0	3	1	4	7	7	1	4	4	5	5	2	1	1	10	1	1	12	0	1	2	0	1	5	1	1	20	0	2		0	4	3
0	0	2	3	1	1	47	3	1	7	0	0	0	17.22	#NULL!	17.22	1	0	5	4	6	7	4	1	1	1	1	1	1	1	2		0	2		0	2		0	1	10	0	2		0	2		0	1	1
0	0	1	2	1	0	67	5	2.75	5	0	0	0	26.97	#NULL!	26.97	3	1	3	1	7	7	7	1	4	4	4	1	2	1	1	1	0	2		0	2		0	2		0	2		0	2		0	6	1
1	1	4.42857	5.42857	1	0	67	5	1	6	1	1	2	40.28	#NULL!	40.28	3	1	2	2	2	5	6	3	1	4	1	3	1	1	1	10	1	1	25	0	1	10	0	1	50	0	1	20	0	1	47	1	5	4
1	1	4.71429	5.71429	1	0	56	3	2.75	5	0	0	0	14.72	#NULL!	14.72	3	1	4	4	5	4	4	4	4	5	4	6	2	1	2		0	2		0	2		0	2		0	2		0	2		0	5	4
1	1	4.42857	5.42857	1	0	63	3	6	3	0	0	0	24.82	#NULL!	24.82	3	1	5	6	5	4	2	4	6	5	7	3	4	7	1	1	0	1	2	0	2		0	2		0	2		0	2		0	6	3
1	1	3.71429	4.71429	1	1	61	4	3	4	2	1	3	41.68	#NULL!	41.68	4	1	3	5	2	5	3	3	4	5	5	6	2	1	1	10	1	1	30	1	1	50	0	1	10	0	1	5	1	1	24	0	5	4
1	1	4	5	1	0	68	5	6	5	0	0	0	41.75	#NULL!	41.75	2	0	4	1	4	4	7	4	7	7	7	7	3	7	1	1%	0	1	25%	0	1	10%	0	1	10	0	1	20	0	2		0	1	1
1	1	3	4	1	1	26	5	2.25	5	2	3	5	24.12	#NULL!	24.12	3	1	3	2	5	6	6	2	3	3	3	5	2	1	1	10	1	1	25	0	1	25	1	1	5	1	1	5	1	1	47	1	4	3
1	1	3.71429	4.71429	1	1	37	4	4	1	2	2	4	60	#NULL!	570.52	3	1	1	2	1	2	6	6	4	4	5	1	4	3	1	10	1	1	25	0	1	25	1	1	5	1	1	10	0	1	47	1	5	3
1	1	3.28571	4.28571	1	0	63	5	3.25	4	1	0	1	45.83	#NULL!	45.83	1	1	2	2	2	3	6	5	4	4	1	4	5	3	1	10	1	2		0	2		0	1	10	0	1	100	0	1	24	0	5	4
1	1	3	4	1	0	49	5	3.75	7	2	0	2	43.25	#NULL!	43.25	1	0	6	4	6	4	4	4	2	4	4	4	3	6	1	10	1	1	30	1	1	20	0	2		0	1	100	0	2		0	4	3
1	1	3.28571	4.28571	1	1	74	5	4	4	3	3	6	48.17	#NULL!	48.17	1	1	2	3	2	4	5	4	3	5	2	5	5	6	1	10	1	1	30	1	1	25	1	1	5	1	1	5	1	1	47	1	5	5
1	1	3	4	1	1	43	4	3	3	2	1	3	60	#NULL!	169.5	2	0	2	5	2	6	3	2	4	4	4	5	2	2	1	10	1	1	30	1	1	10	0	1	10	0	1	5	1	1	24	0	5	3
1	1	2.71429	3.71429	1	0	54	3	1.25	5	3	1	4	38.55	#NULL!	38.55	2	0	4	5	6	4	3	4	1	5	1	1	1	2	1	10	1	1	30	1	1	25	1	1	10	0	1	5	1	1	12	0	6	4
1	1	2.28571	3.28571	1	0	28	3	3	5	1	0	1	37.5	#NULL!	37.5	4	0	3	4	5	4	4	4	5	4	3	4	2	2	1	10	1	2		0	2		0	1	10	0	2		0	1	24	0	3	3
1	1	2	3	1	0	27	3	1	9	1	0	1	39.17	#NULL!	39.17	3	0	4	6	7	7	2	1	1	1	1	1	1	1	1	10	1	1	20	0	1	20	0	1	10	0	2		0	1	7	0	3	2
1	1	1	2	1	1	45	3	3	3	1	2	3	30.03	#NULL!	30.03	2	0	1	2	1	4	6	4	4	4	1	4	4	3	1	10	1	2		0	2		0	1	10	0	1	5	1	1	47	1	2	1
0	1	4	5	1	0	64	5	6.25	5	1	0	1	21.62	#NULL!	21.62	4	1	5	2	4	4	6	4	6	6	7	6	5	7	2		0	2		0	1	25%	1	1	10	0	1	100	0	1	24	0	5	4
0	1	4.14286	5.14286	1	0	71	5	4	5	0	0	0	27.93	#NULL!	27.93	4	1	1	4	3	1	4	7	5	4	5	6	3	3	2		0	2		0	2		0	1	10	0	1	20	0	2		0	6	3
0	1	3	4	1	0	26	4	5.25	7	0	0	0	6.03	#NULL!	6.03	4	0	5	4	3	6	4	2	4	6	6	5	6	5	1	20	0	1	3	0	1	5	0	1	210	0	1	1000	0	1	7	0	2	3
0	1	3.28571	4.28571	1	1	21	4	3.5	4	0	0	0	14.53	#NULL!	14.53	2	0	4	4	4	4	4	4	4	4	4	4	4	2	2		0	2		0	2		0	2		0	2		0	2		0	3	3
0	0	1.71429	2.71429	1	0	18	2	2.5	7	2	0	2	21.55	#NULL!	21.55	1	1	5	1	4	4	7	4	4	4	4	4	1	1	1	10	1	1	30	1	1	20	0	1	10	0	1	100	0	1	24	0	3	2
1	0	3.14286	4.14286	1	1	63	5	3.25	7	1	1	2	28.6	#NULL!	28.6	2	0	5	6	7	2	2	6	4	4	4	3	4	1	1	10	1	1	60	0	1	10	0	1	10	0	1	5	1	1	24	0	4	3
0	0	3.14286	4.14286	1	1	27	3	2.75	5	1	0	1	16.88	#NULL!	16.88	2	0	3	5	4	7	3	1	5	6	2	3	3	1	1	10	1	2		0	1	50	0	1	10	0	1	100	0	1	24	0	5	3
1	1	3.71429	4.85714	1.14286	1	46	5	3.75	6	3	3	6	60	#NULL!	636.67	2	1	4	1	3	6	7	2	4	2	2	6	6	3	1	10	1	1	30	1	1	25	1	1	5	1	1	5	1	1	47	1	5	3
1	1	4.14286	5.28571	1.14286	0	68	4	3.25	7	0	0	0	29.07	#NULL!	29.07	4	1	6	4	5	4	4	4	4	4	4	5	2	3	1	1	0	1	25	0	2		0	2		0	2		0	2		0	5	5
0	1	4.42857	5.57143	1.14286	1	72	5	1.75	4	0	0	0	46.42	#NULL!	46.42	1	1	2	3	2	7	5	1	2	3	1	6	2	2	2		0	1	36	0	1	20	0	1	0,09	0	1	20	0	1	24	0	6	4
0	1	4.42857	5.57143	1.14286	1	71	4	5.75	7	2	0	2	60	#NULL!	66.12	1	0	6	6	6	5	2	3	6	5	6	6	5	6	1	10	1	1	30	1	1	50	0	1	10	0	1	100	0	1	24	0	6	5
1	1	1.28571	2.42857	1.14286	0	47	4	5.5	5	1	1	2	40.93	#NULL!	40.93	4	0	4	1	4	3	7	5	4	4	4	2	7	7	1	10	1	1	ca 20-30 gånger	0	1	30	0	1	10	0	1	5	1	1	36	0	1	1
1	0	3.85714	5	1.14286	0	56	5	3.5	3	0	0	0	19.78	#NULL!	19.78	3	1	4	4	6	4	4	4	5	5	5	4	2	2	1	100	0	2		0	2		0	1	10	0	1	100	0	1	24	0	5	3
1	0	3.57143	4.71429	1.14286	1	39	5	1.5	5	2	3	5	28.85	#NULL!	28.85	2	0	2	5	5	2	3	6	2	2	2	2	1	1	1	10	1	1	30	1	2		0	1	5	1	1	5	1	1	47	1	4	3
1	0	1	2.14286	1.14286	0	43	4	1.25	2	3	3	6	60	#NULL!	131.5	2	1	1	1	1	4	7	4	1	4	2	2	1	1	1	10	1	1	30	1	1	25	1	1	5	1	1	5	1	1	47	1	3	1
0	0	2	3.14286	1.14286	1	35	3	3.5	3	1	0	1	21.48	#NULL!	21.48	4	0	4	4	5	3	4	5	4	4	4	3	3	3	1	10	1	2		0	2		0	1	10	0	1	100	0	2		0	3	2
0	0	2	3.14286	1.14286	1	61	3	1	3	1	0	1	43.67	#NULL!	43.67	4	0	2	6	6	6	2	2	1	2	1	2	1	1	1	10	1	1	25	0	1	33	0	1	105	0	1	50	0	2		0	4	3
0	0	1.14286	2.28571	1.14286	0	72	5	5	4	1	1	2	33.12	#NULL!	33.12	3	0	2	5	5	6	3	2	5	5	5	3	6	4	1	10	1	2		0	2		0	2		0	1	5	1	2		0	2	1
0	0	1	2.14286	1.14286	1	23	4	1	6	2	2	4	49.38	#NULL!	49.38	1	1	5	3	7	6	5	2	1	2	1	2	1	1	1	10	1	1	30	1	1	10	0	1	5	1	1	5	1	1	24	0	1	1
1	1	3.42857	4.57143	1.14286	1	73	3	4.5	6	2	0	2	42.03	#NULL!	42.03	3	0	5	4	5	5	4	3	6	4	5	6	5	2	1	10	1	1	25	0	1	25	1	1	10	0	1	100	0	2		0	4	3
1	1	3.85714	5	1.14286	1	58	3	4	4	3	2	5	19.75	#NULL!	19.75	3	1	3	5	3	6	3	2	5	5	5	4	3	3	1	10	1	1	30	1	1	25	1	1	5	1	1	5	1	1	24	0	4	3
1	1	3.85714	5	1.14286	1	72	3	3.75	4	1	1	2	50.88	#NULL!	50.88	4	1	3	5	3	5	3	3	5	6	5	3	2	3	1	10	1	1	25	0	1	40	0	1	10	0	1	100	0	1	47	1	5	4
1	1	3.42857	4.57143	1.14286	1	66	2	2.25	7	0	1	1	50.9	#NULL!	50.9	4	0	4	6	6	4	2	4	3	3	4	3	1	1	1	100	0	1	3	0	1	10	0	1	10	0	1	5	1	1	24	0	4	4
1	1	3.57143	4.71429	1.14286	0	57	5	5.75	5	1	0	1	43.2	#NULL!	43.2	2	0	4	6	5	5	2	3	5	4	4	1	7	7	1	10	1	1	16	0	1	10	0	1	10	0	1	100	0	1	24	0	4	5
1	1	3.42857	4.57143	1.14286	0	34	3	3.25	4	2	0	2	22.98	#NULL!	22.98	2	1	5	5	6	6	3	2	4	5	4	2	4	1	1	10	1	1	25	0	1	25	1	1	10	0	1	100	0	2		0	5	4
1	1	3.42857	4.57143	1.14286	1	70	5	1	3	1	3	4	46.52	#NULL!	46.52	2	1	1	2	1	4	6	4	1	1	1	3	1	1	1	10	1	1	25	0	1	40	0	1	5	1	1	5	1	1	47	1	4	5
1	1	2.71429	3.85714	1.14286	0	60	3	3.25	5	0	0	0	35.03	#NULL!	35.03	1	0	4	4	2	4	4	4	4	4	4	4	2	3	2		0	2		0	2		0	2		0	2		0	1	24	0	1	1
1	1	2.71429	3.85714	1.14286	0	35	3	2.25	5	0	0	0	26.75	#NULL!	26.75	2	1	4	4	6	3	4	5	3	5	4	6	1	1	1	100	0	2		0	1	10	0	2		0	1	100	0	1	24	0	5	3
1	1	2.28571	3.42857	1.14286	1	59	3	1	8	0	1	1	18.88	#NULL!	18.88	1	0	6	7	6	6	1	2	1	1	1	1	1	1	1	100	0	1	24	0	1	10	0	1	10	0	1	1	0	1	47	1	4	4
0	1	2	3.14286	1.14286	1	75	5	1.25	5	1	0	1	32.02	#NULL!	32.02	2	1	7	7	4	4	1	4	1	1	2	1	1	1	1	10	1	1	10	0	1	30	0	1	10	0	1	100	0	1	24	0	1	1
0	1	2.85714	4	1.14286	0	61	5	3.25	6	2	0	2	15.2	#NULL!	15.2	1	0	4	3	4	5	5	3	4	6	4	4	3	2	1	10	1	1	30	1	2		0	1	10	0	1	100	0	2		0	4	3
0	1	2.71429	3.85714	1.14286	0	73	5	4	6	1	0	1	25.28	#NULL!	25.28	1	1	4	5	5	3	3	5	3	3	4	4	5	4	1	Tio	1	2		0	1	4	0	1	Tio	0	2		0	2		0	4	2
0	1	2.71429	3.85714	1.14286	0	59	5	1.5	3	2	0	2	24.07	#NULL!	24.07	1	0	3	2	2	6	6	2	1	4	1	5	1	3	1	10	1	1	30	1	1	10	0	1	10	0	1	1	0	1	7	0	3	2
0	1	2.57143	3.71429	1.14286	0	36	3	5	7	0	0	0	17.12	#NULL!	17.12	1	0	1	7	5	7	1	1	4	5	5	4	5	6	2		0	2		0	1	4	0	1	10	0	2		0	1	24	0	5	2
0	1	2.71429	3.85714	1.14286	0	37	4	1	8	0	0	0	23.2	#NULL!	23.2	3	0	7	1	4	7	7	1	1	1	1	1	1	1	1	1	0	2		0	2		0	1	10	0	1	1	0	1	24	0	5	4
1	0	3	4.14286	1.14286	1	63	2	1	5	2	0	2	39.53	#NULL!	39.53	2	0	5	4	4	4	4	4	1	1	1	1	1	1	1	10	1	1	25	0	1	25	1	1	10	0	1	100	0	1	12	0	4	2
0	0	2.42857	3.57143	1.14286	0	60	2	2.5	2	2	1	3	40.45	#NULL!	40.45	4	0	3	5	5	4	3	4	4	6	4	4	1	1	2		0	1	30	1	1	25	1	1	10	0	1	5	1	1	12	0	4	4
1	1	3	4.14286	1.14286	1	49	3	4	7	2	1	3	47.03	#NULL!	47.03	3	0	5	6	5	6	2	2	5	5	3	5	5	3	1	10	1	1	30	1	1	40	0	1	10	0	1	100	0	1	47	1	3	2
1	1	3.28571	4.42857	1.14286	1	37	2	3	4	2	3	5	28.63	#NULL!	28.63	4	1	5	5	4	5	3	3	4	4	4	5	3	1	1	10	1	1	30	1	1	40	0	1	5	1	1	5	1	1	47	1	6	4
1	1	3	4.14286	1.14286	1	42	3	1	7	2	2	4	39.78	#NULL!	39.78	4	0	6	3	5	4	5	4	1	1	1	1	1	1	1	10	1	1	30	1	1	40	0	1	5	1	1	5	1	2		0	3	3
1	1	2.42857	3.57143	1.14286	1	66	5	4.75	6	1	0	1	23.4	#NULL!	23.4	2	0	5	3	5	5	5	3	5	4	5	3	5	4	1	10	1	1	0	0	1	50	0	1	10	0	1	100	0	1	24	0	3	2
0	1	3	4.14286	1.14286	1	72	4	2.75	5	1	3	4	29.25	#NULL!	29.25	4	0	3	4	4	5	4	3	4	4	4	5	1	2	1	10	1	1	25	0	1	20	0	1	5	1	1	5	1	1	47	1	6	3
0	1	3.28571	4.42857	1.14286	1	26	3	2.75	5	1	2	3	28.82	#NULL!	28.82	4	1	5	4	2	4	4	4	4	4	4	2	2	1	1	100	0	1	30	1	1	40	0	1	5	1	1	5	1	1	12	0	4	1
0	1	3.28571	4.42857	1.14286	0	57	2	3.75	6	0	0	0	22.13	#NULL!	22.13	4	1	4	6	4	1	2	7	1	4	1	1	7	6	2		0	1	10	0	2		0	1	10	0	2		0	2		0	6	5
0	1	4.28571	5.42857	1.14286	0	69	3	5.75	3	3	0	3	28.25	#NULL!	28.25	4	1	2	3	1	1	5	7	6	6	6	7	5	6	1	10	1	1	30	1	1	25	1	1	10	0	1	100	0	1	48	0	5	6
1	1	3.57143	4.85714	1.28571	0	56	5	5.25	4	1	1	2	37.1	#NULL!	37.1	3	1	3	5	3	6	3	2	6	6	6	6	5	4	1	10	1	1	20	0	1	20	0	1	5	1	1	20	0	2		0	4	4
0	1	3.57143	4.85714	1.28571	1	46	5	4.25	4	1	1	2	20.68	#NULL!	20.68	4	0	3	3	3	6	5	2	5	6	6	5	3	3	1	10	1	1	25	0	1	10	0	1	5	1	1	1	0	1	12	0	6	4
1	0	2	3.28571	1.28571	0	35	3	1	5	2	0	2	14.33	#NULL!	14.33	2	0	5	4	6	3	4	5	1	3	1	1	1	1	1	10	1	1	30	1	1	40	0	1	10	0	1	25	0	1	24	0	3	2
0	0	3.71429	5	1.28571	0	61	3	5	2	0	0	0	14.08	#NULL!	14.08	4	0	6	6	7	3	2	5	5	5	5	3	5	5	1	100	0	1	25	0	1	58	0	1	110	0	2		0	1	12	0	4	4
0	0	3	4.28571	1.28571	0	51	3	1.5	7	2	0	2	22.38	#NULL!	22.38	2	0	4	6	6	7	2	1	1	4	1	2	1	3	1	10	1	1	30	1	2		0	2		0	2		0	2		0	5	3
0	0	2.71429	4	1.28571	0	72	4	3.25	2	1	0	1	53.13	#NULL!	53.13	3	0	3	3	4	3	5	5	5	5	5	5	1	2	1	10	1	1	35	0	1	20	0	1	10	0	1	100	0	1	12	0	3	2
0	0	2.14286	3.42857	1.28571	1	33	3	2.5	7	1	1	2	18.95	#NULL!	18.95	2	0	3	5	5	2	3	6	3	3	3	4	2	2	1	10	1	2		0	1	0	0	1	10	0	1	5	1	1	5	0	4	2
0	0	1	2.28571	1.28571	1	21	4	1	5	3	2	5	25.57	#NULL!	25.57	2	1	3	4	7	6	4	2	1	3	1	2	1	1	1	10 personer av 1000	1	1	Ungefär 30 gånger	1	1	25%	1	2		0	1	5	1	1	47	1	1	1
1	1	4.42857	5.71429	1.28571	0	59	5	2.5	2	1	0	1	33.63	#NULL!	33.63	3	0	1	1	1	7	7	1	1	6	6	7	1	2	1	10	1	1	3	0	2		0	2		0	1	100	0	1	12	0	6	4
1	1	4.42857	5.71429	1.28571	0	21	2	4.5	5	0	0	0	22.78	#NULL!	22.78	3	0	3	1	1	4	7	4	7	7	7	7	3	1	1	50	0	2		0	2		0	1	10	0	1	100	0	1	24	0	6	6
1	1	2.71429	4	1.28571	0	72	3	4.75	6	1	0	1	23.7	#NULL!	23.7	3	1	3	2	6	4	6	4	4	4	4	4	5	6	1	10	1	1	25	0	2		0	1	10	0	1	100	0	1	24	0	2	2
1	1	3.28571	4.57143	1.28571	0	57	3	5	6	0	0	0	60	#NULL!	73.85	3	1	3	3	5	6	5	2	5	6	5	3	5	5	1	100	0	1	5	0	1	10	0	1	10	0	1	100	0	1	24	0	5	4
1	1	2.57143	3.85714	1.28571	0	51	5	1.5	7	1	3	4	15.37	#NULL!	15.37	3	1	6	2	5	2	6	6	2	5	1	2	1	2	1	10	1	1	25	0	2		0	1	5	1	1	5	1	1	47	1	4	3
1	1	2	3.28571	1.28571	1	35	3	2.25	4	3	1	4	35.73	#NULL!	35.73	3	0	3	4	4	5	4	3	2	3	2	2	3	2	1	10	1	1	30	1	1	25	1	1	10	0	1	5	1	1	24	0	5	3
1	1	1	2.28571	1.28571	0	46	5	1.5	4	1	2	3	13.67	#NULL!	13.67	1	0	2	4	2	5	4	3	2	2	2	3	1	1	1	10	1	1	25	0	1	10	0	1	10	0	1	5	1	1	47	1	3	1
1	1	1	2.28571	1.28571	0	46	5	3.25	6	2	1	3	20.98	#NULL!	20.98	4	0	5	5	6	1	3	7	3	4	3	3	4	3	1	10	1	1	30	1	1	20	0	1	10	0	1	100	0	1	47	1	3	1
1	1	1	2.28571	1.28571	0	48	3	1	4	1	0	1	20	#NULL!	20	1	0	3	5	4	2	3	6	1	1	1	2	1	1	1	10	1	2		0	2		0	2		0	2		0	2		0	3	1
0	1	4.14286	5.42857	1.28571	0	64	4	2.5	5	2	1	3	23.37	#NULL!	23.37	1	1	4	5	4	4	3	4	4	6	4	5	1	1	1	10	1	1	30	1	2		0	1	10	0	1	5	1	1	24	0	5	1
0	1	4.57143	5.85714	1.28571	1	72	2	1	3	0	1	1	33.88	#NULL!	33.88	1	0	6	6	5	2	2	6	1	7	1	5	1	1	1	100	0	2		0	2		0	1	10	0	1	5	1	1	24	0	6	6
0	1	3	4.28571	1.28571	0	52	5	3.5	8	1	0	1	20	#NULL!	20	4	0	4	4	2	4	4	4	5	5	5	5	1	3	1	10	1	2		0	2		0	1	10	0	2		0	2		0	4	3
1	1	1.28571	2.57143	1.28571	1	44	4	2	8	3	3	6	47	#NULL!	47	1	1	7	1	5	7	7	1	2	7	3	3	2	1	1	10	1	1	30	1	1	25	1	1	5	1	1	5	1	1	47	1	2	1
1	0	3.85714	5.14286	1.28571	0	44	5	6.25	7	0	0	0	38.23	#NULL!	38.23	3	0	6	5	5	2	3	6	7	6	6	6	6	6	1	1	0	2		0	1	75	0	1	10	0	1	100	0	2		0	5	3
1	0	2.85714	4.14286	1.28571	0	49	3	4.25	3	0	0	0	16.92	#NULL!	16.92	2	1	3	2	1	3	6	5	6	6	6	6	2	3	2		0	2		0	2		0	2		0	2		0	2		0	4	3
1	0	2.42857	3.71429	1.28571	1	70	3	1.25	4	2	2	4	55.15	#NULL!	55.15	3	0	3	2	3	6	6	2	2	4	1	4	1	1	1	10	1	1	33	0	1	25	1	1	5	1	1	1	0	1	47	1	5	3
0	0	2.85714	4.14286	1.28571	1	57	3	3	7	1	1	2	33.02	#NULL!	33.02	1	1	2	2	6	6	6	2	4	4	4	3	2	2	1	10	1	2		0	1	40	0	1	10	0	1	5	1	1	0	0	4	3
0	0	2.42857	3.71429	1.28571	1	34	3	1.75	7	1	0	1	6.15	#NULL!	6.15	3	0	5	5	4	4	3	4	1	4	4	4	1	1	1	10	1	1	3	0	1	30	0	1	1	0	1	100	0	1	24	0	3	3
1	1	2.28571	3.57143	1.28571	1	57	5	3.75	6	1	1	2	27.15	#NULL!	27.15	2	1	4	4	3	4	4	4	4	4	4	5	4	3	1	10	1	1	25	0	1	10	0	1	10	0	1	100	0	1	47	1	2	2
1	1	3.85714	5.14286	1.28571	0	53	5	3.75	4	2	2	4	60	#NULL!	79.7	2	0	3	5	5	2	3	6	5	6	5	5	4	1	1	10	1	1	En tärning kan ej	0	1	25%	1	1	10	0	1	5	1	1	47	1	5	6
1	1	2.42857	3.71429	1.28571	1	41	5	2	2	2	3	5	26.47	#NULL!	26.47	2	1	3	1	2	3	7	5	3	3	3	4	1	1	1	10	1	1	30	1	1	20	0	1	5	1	1	5	1	1	47	1	3	2
0	1	3.14286	4.42857	1.28571	1	54	5	5.5	6	1	1	2	47.83	#NULL!	47.83	4	0	2	4	7	6	4	2	6	6	6	4	6	4	1	10	1	1	50	0	1	20	0	1	10	0	1	5	1	1	22	0	5	3
0	1	3.14286	4.42857	1.28571	0	60	2	1.25	4	1	0	1	25.53	#NULL!	25.53	2	0	3	3	4	5	5	3	1	2	2	2	1	1	1	10	1	2		0	2		0	1	10	0	2		0	2		0	5	4
0	1	3.14286	4.42857	1.28571	0	43	4	4	3	2	2	4	42.8	#NULL!	42.8	1	0	2	4	4	5	4	3	5	4	4	5	4	3	1	10	1	2		0	1	25	1	1	10	0	1	5	1	1	47	1	4	4
0	1	2.85714	4.14286	1.28571	0	65	3	4.75	5	0	0	0	23.27	#NULL!	23.27	3	0	4	4	5	4	4	4	4	4	4	4	5	6	2		0	2		0	2		0	2		0	2		0	2		0	3	2
0	1	2.85714	4.14286	1.28571	0	30	5	1.5	5	2	1	3	25.97	#NULL!	25.97	2	0	5	3	2	4	5	4	1	3	2	3	2	1	1	10	1	1	30	1	1	10	0	1	10	0	1	5	1	2		0	4	4
1	1	4.42857	5.85714	1.42857	1	38	5	3.75	3	3	2	5	46.88	#NULL!	46.88	3	0	2	5	7	4	3	4	6	6	7	3	1	1	1	10	1	1	30	1	1	25	1	1	10	0	1	5	1	1	47	1	6	3
1	0	3.14286	4.57143	1.42857	1	55	5	2.25	2	2	0	2	14.92	#NULL!	14.92	1	0	3	2	5	5	6	3	5	5	2	4	1	1	1	10	1	1	30	1	1	10	0	1	10	0	1	100	0	1	24	0	5	3
1	0	2	3.42857	1.42857	1	35	4	3.5	3	2	1	3	31.42	#NULL!	31.42	2	1	1	2	1	7	6	1	6	6	5	5	2	1	1	10	1	1	30	1	1	10	0	1	10	0	1	100	0	1	47	1	3	2
0	0	3.42857	4.85714	1.42857	0	36	5	3.5	5	1	0	1	33.62	#NULL!	33.62	1	1	5	4	4	4	4	4	4	4	4	4	4	2	1	10	1	1	8	0	1	20	0	1	10	0	1	100	0	1	24	0	1	1
0	0	3.14286	4.57143	1.42857	0	47	3	1	3	0	0	0	12.65	#NULL!	12.65	3	0	2	1	3	2	7	6	1	1	1	4	1	1	2		0	1	10	0	1	15	0	1	10	0	2		0	1	24	0	4	3
0	0	2.57143	4	1.42857	1	58	5	5	4	1	1	2	47.6	#NULL!	47.6	1	1	1	5	1	3	3	5	6	7	5	6	5	4	1	10	1	2		0	1	10	0	1	10	0	1	5	1	1	24	0	3	2
0	0	2	3.42857	1.42857	1	59	4	1	5	1	0	1	26.65	#NULL!	26.65	1	1	4	2	2	5	6	3	1	1	1	1	1	1	1	10	1	2		0	2		0	1	10	0	2		0	1	24	0	4	2
1	1	3.14286	4.57143	1.42857	0	67	5	6.5	3	3	3	6	52.6	#NULL!	52.6	3	1	2	5	4	4	3	4	7	7	7	7	5	7	1	10	1	1	30	1	1	25	1	1	5	1	1	5	1	1	47	1	5	2
1	1	3.57143	5	1.42857	1	55	3	6.5	5	1	1	2	31.33	#NULL!	31.33	4	0	4	5	3	3	3	5	7	6	6	6	6	7	1	10	1	1	40	0	1	10	0	1	5	1	1	100	0	1	24	0	5	4
1	1	3.42857	4.85714	1.42857	1	67	5	5.25	7	1	0	1	28.48	#NULL!	28.48	4	1	5	5	5	2	3	6	5	5	5	5	5	6	1	10	1	1	20	0	2		0	1	9	0	1	60	0	1	24	0	5	4
1	1	2	3.42857	1.42857	1	48	4	4.25	4	2	2	4	38.63	#NULL!	38.63	2	1	1	3	2	5	5	3	4	5	4	4	5	4	1	10	1	1	30	1	1	10	0	1	5	1	1	1	0	1	47	1	3	2
1	1	2	3.42857	1.42857	0	55	5	3.5	3	3	3	6	28.75	#NULL!	28.75	2	0	2	5	2	3	3	5	5	5	4	4	3	2	1	10	1	1	30	1	1	25	1	1	5	1	1	5	1	1	47	1	3	2
1	1	3.14286	4.57143	1.42857	0	44	4	4	6	2	3	5	50.72	#NULL!	50.72	1	0	5	2	2	3	6	5	5	6	6	6	2	3	1	10	1	1	30	1	1	10	0	1	5	1	1	5	1	1	47	1	5	4
1	1	2	3.42857	1.42857	1	51	3	3	7	1	1	2	20.23	#NULL!	20.23	2	0	5	6	4	7	2	1	4	4	4	2	3	1	1	10	1	2		0	1	10	0	1	10	0	1	5	1	1	24	0	4	2
0	1	2.85714	4.28571	1.42857	0	67	3	3.5	7	0	0	0	60	#NULL!	78.93	2	1	4	4	4	4	4	4	4	4	5	3	4	1	2		0	1	40	0	1	2	0	1	10	0	2		0	1	24	0	5	2
0	1	3.42857	4.85714	1.42857	0	53	3	3	5	2	0	2	23.13	#NULL!	23.13	2	0	5	4	3	4	4	4	1	3	4	4	4	3	1	10	1	2		0	1	25	1	1	10	0	1	100	0	2		0	1	3
0	1	2.85714	4.28571	1.42857	1	46	3	3	5	2	1	3	55.97	#NULL!	55.97	3	0	6	2	2	3	6	5	4	4	4	5	2	2	1	10	1	1	25	0	1	25	1	1	10	0	1	100	0	1	47	1	5	2
0	1	2.85714	4.28571	1.42857	0	55	3	4.75	7	1	1	2	51.27	#NULL!	51.27	3	1	6	6	5	3	2	5	4	5	5	5	5	5	1	10	1	1	15	0	1	5	0	2		0	1	100	0	1	47	1	4	3
0	1	2	3.42857	1.42857	1	74	3	1.5	4	0	1	1	44.08	#NULL!	44.08	1	1	3	3	4	6	5	2	2	3	2	2	1	1	1	1	0	1	15	0	1	33	0	1	10	0	1	100	0	1	47	1	4	2
1	0	1.71429	3.14286	1.42857	0	68	5	3.5	6	0	0	0	35.22	#NULL!	35.22	2	0	4	6	5	3	2	5	5	4	5	5	1	3	1	1	0	1	10	0	1	2	0	1	10	0	1	100	0	1	24	0	2	2
1	1	1.57143	3	1.42857	0	35	5	2.75	6	2	1	3	33.72	#NULL!	33.72	2	1	5	2	1	4	6	4	5	5	4	6	1	1	1	10	1	1	30	1	1	20	0	1	10	0	1	5	1	1	24	0	4	2
0	1	1.28571	2.71429	1.42857	1	31	3	3	5	0	0	0	14.73	#NULL!	14.73	2	0	4	7	6	1	1	7	5	5	5	5	1	1	1	100	0	2		0	2		0	1	10	0	2		0	1	44	0	1	1
1	0	4.28571	5.71429	1.42857	1	63	4	1	5	1	3	4	37.85	#NULL!	37.85	4	0	5	4	6	7	4	1	1	5	1	2	1	1	1	10	1	1	25	0	1	10	0	1	5	1	1	5	1	1	47	1	6	4
1	0	3.71429	5.14286	1.42857	1	64	5	3.5	7	1	1	2	31.67	#NULL!	31.67	3	1	7	5	4	7	3	1	4	6	4	3	4	2	1	10	1	1	10	0	1	4	0	1	10	0	1	100	0	1	47	1	5	4
1	0	3	4.42857	1.42857	0	41	4	3.75	5	1	0	1	30.65	#NULL!	30.65	3	1	1	6	7	4	2	4	4	4	4	4	4	3	1	10	1	2		0	2		0	1	10	0	2		0	2		0	4	3
0	0	2.71429	4.14286	1.42857	1	62	2	3.75	4	0	1	1	31.5	#NULL!	31.5	4	0	7	1	7	7	7	1	1	1	6	1	6	2	1	3	0	1	1/3 * 1/5 = 1/15	0	1	5/10*2/1	0	1	5	1	1	100	0	1	24	0	4	3
1	1	4.28571	5.71429	1.42857	0	66	3	3.5	9	0	0	0	26.43	#NULL!	26.43	2	0	3	3	2	4	5	4	7	7	4	5	1	2	2		0	2		0	2		0	1	10	0	2		0	1	24	0	4	4
1	1	3	4.42857	1.42857	0	19	3	4.25	2	3	2	5	26.25	#NULL!	26.25	2	1	2	1	1	3	7	5	6	6	6	6	2	3	1	10	1	1	30	1	1	25	1	1	10	0	1	5	1	1	47	1	4	3
1	1	3.28571	4.71429	1.42857	0	40	5	1.5	3	2	3	5	44.25	#NULL!	44.25	2	1	2	1	2	3	7	5	2	7	1	5	1	2	1	10	1	1	30	1	2		0	1	5	1	1	5	1	1	47	1	5	5
1	1	2.14286	3.57143	1.42857	0	18	3	2.75	5	0	0	0	20.02	#NULL!	20.02	1	1	4	2	3	6	6	2	5	2	1	6	2	3	1	1	0	1	10	0	2		0	1	10	0	1	100	0	1	24	0	2	2
0	1	2.71429	4.14286	1.42857	0	72	2	4	6	0	0	0	34.93	#NULL!	34.93	3	1	2	4	3	5	4	3	4	4	4	2	2	6	2		0	2		0	2		0	2		0	2		0	2		0	5	2
0	1	3.28571	4.71429	1.42857	1	43	4	1.5	3	1	1	2	17.02	#NULL!	17.02	4	0	2	6	2	4	2	4	2	2	2	5	1	1	1	10	1	1	3	0	1	20	0	1	10	0	1	5	1	1	24	0	4	3
0	1	2.71429	4.14286	1.42857	0	52	3	2.25	7	1	2	3	18.75	#NULL!	18.75	3	1	6	4	6	6	4	2	2	5	5	2	1	1	1	10	1	1	25	0	1	33	0	1	10	0	1	5	1	1	47	1	2	2
1	0	3	4.57143	1.57143	0	62	2	1	5	0	0	0	26.7	#NULL!	26.7	2	0	1	2	7	7	6	1	1	1	1	1	1	1	1	1	0	2		0	2		0	1	10	0	2		0	1	24	0	4	3
1	0	1.85714	3.42857	1.57143	0	18	2	3.25	6	0	0	0	60	#NULL!	288.67	3	1	4	2	1	3	6	5	4	4	4	4	2	3	2		0	2		0	2		0	2		0	1	100	0	1	24	0	4	2
1	0	1.85714	3.42857	1.57143	1	63	4	3	6	1	0	1	30.8	#NULL!	30.8	2	0	2	4	4	6	4	2	4	4	5	4	2	1	1	10	1	2		0	2		0	2		0	2		0	2		0	4	2
1	1	3.71429	5.28571	1.57143	0	61	5	3	3	0	0	0	38.68	#NULL!	38.68	4	0	3	7	4	2	1	6	4	6	5	4	1	2	2		0	2		0	2		0	2		0	2		0	2		0	5	1
1	1	4	5.57143	1.57143	0	54	5	4.25	6	1	0	1	41.88	#NULL!	41.88	1	0	2	2	5	7	6	1	6	6	6	6	3	2	1	10	1	1	25	0	1	40	0	1	10	0	1	100	0	1	36	0	5	2
1	1	3.71429	5.28571	1.57143	0	58	3	2.5	7	0	0	0	24.65	#NULL!	24.65	2	0	6	2	5	5	6	3	4	4	4	1	1	1	2		0	2		0	2		0	1	10	0	1	100	0	2		0	5	3
1	1	3.71429	5.28571	1.57143	1	40	3	1.25	6	3	1	4	28.28	#NULL!	28.28	3	1	3	3	5	5	5	3	1	1	2	2	1	1	1	10	1	1	30	1	1	25	1	1	10	0	1	100	0	1	47	1	5	4
1	1	3.28571	4.85714	1.57143	1	61	3	2.5	4	1	1	2	34.58	#NULL!	34.58	2	0	2	2	5	6	6	2	4	3	4	5	1	1	1	10	1	1	25	0	1	10	0	1	10	0	1	100	0	1	47	1	4	4
1	1	2.71429	4.28571	1.57143	0	75	3	3.5	3	0	0	0	32.42	#NULL!	32.42	2	1	3	5	6	3	3	5	4	4	4	2	3	3	2		0	2		0	2		0	1	10	0	2		0	2		0	5	2
1	1	3	4.57143	1.57143	0	43	5	3	7	0	1	1	34.68	#NULL!	34.68	4	0	5	4	4	4	4	4	4	5	6	4	1	1	1	1	0	1	25	0	1	20	0	1	5	1	1	100	0	1	24	0	3	3
0	1	3.28571	4.85714	1.57143	0	48	5	2.25	3	2	1	3	33	#NULL!	33	3	0	3	2	2	6	6	2	3	5	3	3	2	1	1	10	1	1	30	1	1	10	0	1	10	0	1	5	1	1	24	0	3	1
0	1	3	4.57143	1.57143	1	52	5	3.25	6	1	0	1	20.47	#NULL!	20.47	3	1	2	3	2	7	5	1	5	4	5	5	1	2	1	10	1	1	3	0	2		0	1	10	0	2		0	1	24	0	5	5
0	0	1.57143	3.14286	1.57143	1	36	5	2	6	3	1	4	24.68	#NULL!	24.68	1	1	6	4	5	4	4	4	2	2	2	3	1	3	1	10	1	1	30	1	1	25	1	1	105	0	1	100	0	1	47	1	4	1
0	1	1.28571	2.85714	1.57143	0	51	3	3.25	6	2	1	3	32.08	#NULL!	32.08	1	1	6	3	4	2	5	6	5	4	4	6	1	3	1	10	1	1	25	0	1	25	1	1	10	0	1	5	1	1	36	0	2	2
1	0	2.28571	3.85714	1.57143	1	29	5	1.5	5	2	0	2	60	#NULL!	265.32	4	1	5	4	3	4	4	4	3	3	1	5	1	1	1	10	1	1	50%	0	1	25	1	1	10	0	1	100	0	1	24	0	4	3
1	0	2	3.57143	1.57143	1	43	4	1	8	3	2	5	30.67	#NULL!	30.67	1	0	6	6	6	7	2	1	1	1	1	2	1	1	1	10	1	1	30	1	1	25	1	1	10	0	1	5	1	1	47	1	5	2
0	0	3.42857	5	1.57143	0	37	3	1	9	2	2	4	34	#NULL!	34	1	0	7	6	7	7	2	1	1	5	1	1	1	1	1	10	1	1	30	1	1	60	0	1	5	1	1	5	1	1	1	0	3	3
0	0	2.57143	4.14286	1.57143	0	53	3	1	3	0	0	0	30.75	#NULL!	30.75	3	0	6	6	6	6	2	2	1	1	1	1	1	1	2		0	2		0	2		0	1	10	0	2		0	1	24	0	1	3
0	0	2.57143	4.14286	1.57143	1	35	3	1.5	5	3	2	5	33.77	#NULL!	33.77	3	1	6	5	6	5	3	3	1	2	2	2	1	2	1	10	1	1	30	1	1	25	1	1	5	1	1	100	0	1	47	1	5	3
0	0	2.14286	3.71429	1.57143	0	62	4	1.25	7	0	1	1	30.27	#NULL!	30.27	4	0	4	6	6	7	2	1	1	3	1	1	1	2	1	1 %	0	2		0	2		0	2		0	1	5	1	2		0	4	3
0	0	2.14286	3.71429	1.57143	1	35	3	1.5	7	3	1	4	43	#NULL!	43	3	0	6	3	5	6	5	2	1	1	1	3	2	2	1	10	1	1	30	1	1	25	1	1	10	0	1	100	0	1	47	1	4	2
0	0	2.14286	3.71429	1.57143	1	57	3	3.5	6	1	1	2	19.17	#NULL!	19.17	3	1	6	4	6	5	4	3	4	4	4	2	4	2	1	1	0	2		0	1	25	1	1	10	0	1	100	0	1	47	1	5	2
0	0	1.14286	2.71429	1.57143	1	61	5	2.5	8	1	0	1	21.88	#NULL!	21.88	2	1	3	7	6	6	1	2	2	4	3	3	2	3	1	10	1	2		0	2		0	1	10	0	2		0	2		0	3	1
1	1	3.42857	5	1.57143	0	61	3	3	6	1	1	2	19.55	#NULL!	19.55	3	1	4	5	4	6	3	2	5	4	5	4	1	1	1	10	1	2		0	2		0	1	10	0	1	5	1	2		0	5	4
1	1	2.85714	4.42857	1.57143	1	54	5	1	7	2	2	4	31.2	#NULL!	31.2	1	1	6	1	4	4	7	4	1	1	1	1	1	1	1	10	1	1	30	1	1	33	0	1	10	0	1	5	1	1	47	1	5	4
1	1	2.85714	4.42857	1.57143	1	44	5	3.25	3	3	1	4	42.62	#NULL!	42.62	4	0	2	1	1	2	7	6	5	4	4	6	3	1	1	10	1	1	30	1	1	25	1	1	10	0	1	5	1	1	24	0	5	5
1	1	2.57143	4.14286	1.57143	0	48	3	3.75	5	0	0	0	60	#NULL!	66.03	2	1	6	4	6	5	4	3	5	4	5	5	3	2	1	0	0	2		0	2		0	2		0	2		0	2		0	4	3
1	1	2.42857	4	1.57143	0	31	2	3.5	3	0	0	0	5.1	#NULL!	5.1	2	0	5	3	7	3	5	5	4	4	4	4	4	2	2		0	2		0	2		0	2		0	2		0	2		0	4	1
1	1	2	3.57143	1.57143	1	68	5	5	5	2	3	5	56.1	#NULL!	56.1	2	1	4	4	6	6	4	2	5	5	5	4	4	6	1	9	0	1	30	1	1	25	1	1	5	1	1	5	1	1	47	1	2	2
1	1	1	2.57143	1.57143	1	33	5	3.5	7	2	1	3	13.5	#NULL!	13.5	3	0	6	7	1	7	1	1	5	5	5	5	3	1	1	10	1	2		0	1	25	1	1	10	0	1	5	1	2		0	1	1
0	1	3.85714	5.42857	1.57143	0	44	3	4.5	5	0	0	0	41.52	#NULL!	41.52	4	0	4	2	2	2	6	6	4	5	3	1	5	6	1	1person	0	2		0	1	10	0	1	10	0	1	100	0	1	24	0	4	4
0	1	2.28571	3.85714	1.57143	1	60	5	2.25	3	2	0	2	31.05	#NULL!	31.05	2	0	7	7	7	7	1	1	1	4	6	1	1	1	1	10	1	1	30	1	1	10	0	1	10	0	2		0	2		0	5	3
0	1	2.42857	4	1.57143	1	65	5	3.75	3	2	1	3	60	#NULL!	234.53	4	1	1	7	1	2	1	6	7	7	5	5	1	2	1	Tio	1	1	30	1	1	10	0	1	10	0	1	100	0	1	47	1	5	2
0	1	2.14286	3.71429	1.57143	1	61	3	1.75	7	2	3	5	42.6	#NULL!	42.6	2	0	5	5	4	5	3	3	2	3	2	2	1	2	1	10	1	1	30	1	1	4	0	1	5	1	1	5	1	1	47	1	4	2
0	1	2.85714	4.42857	1.57143	1	71	3	4.25	6	2	2	4	33.83	#NULL!	33.83	2	0	6	3	6	6	5	2	6	6	6	5	2	3	1	10	1	1	30	1	1	33	0	1	10	0	1	5	1	1	47	1	5	2
0	1	1.14286	2.71429	1.57143	1	51	5	2.75	9	3	2	5	36.58	#NULL!	36.58	2	1	1	1	7	7	7	1	3	7	4	2	1	3	1	10	1	1	30	1	1	25	1	1	10	0	1	5	1	1	47	1	4	1
1	0	2.57143	4.28571	1.71429	1	28	5	3	5	2	3	5	23.53	#NULL!	23.53	1	0	5	4	6	4	4	4	3	2	2	2	2	5	1	10	1	1	30	1	1	40	0	1	5	1	1	5	1	1	47	1	5	2
1	0	2.85714	4.57143	1.71429	1	71	5	2.5	7	1	0	1	23.18	#NULL!	23.18	3	1	6	6	5	1	2	7	4	7	4	4	1	1	1	10	1	1	38	0	2		0	1	10	0	1	20	0	2		0	6	4
1	0	2.57143	4.28571	1.71429	1	28	3	1	6	0	0	0	23.72	#NULL!	23.72	3	1	5	3	4	4	5	4	1	4	1	7	1	1	1	1	0	1	25	0	1	40	0	1	10	0	1	100	0	1	24	0	2	2
1	0	2.57143	4.28571	1.71429	0	31	5	1.5	1	2	2	4	13.73	#NULL!	13.73	4	1	2	2	1	6	6	2	1	1	2	1	2	1	1	10	1	1	30	1	2		0	1	5	1	1	5	1	1	24	0	5	2
0	0	3.57143	5.28571	1.71429	1	66	4	3	7	2	1	3	19.18	#NULL!	19.18	3	1	7	6	4	7	2	1	4	4	5	2	1	2	1	10	1	1	30	1	1	5	0	1	10	0	1	5	1	1	24	0	6	4
0	0	2.85714	4.57143	1.71429	1	22	4	1	8	3	2	5	60	#NULL!	61.03	1	1	6	1	3	7	7	1	1	2	1	1	1	1	1	10	1	1	30	1	1	25	1	1	5	1	1	5	1	1	34	0	5	3
0	0	2.85714	4.57143	1.71429	1	50	5	2.5	7	2	3	5	16.25	#NULL!	16.25	4	0	7	7	6	7	1	1	4	4	3	3	2	1	1	10	1	1	30	1	1	10	0	1	5	1	1	5	1	1	47	1	4	3
0	0	3.14286	4.85714	1.71429	1	51	3	1.25	4	2	1	3	19.62	#NULL!	19.62	2	0	2	5	4	6	3	2	2	3	1	2	1	1	1	10	1	1	30	1	1	10	0	1	10	0	1	5	1	1	24	0	4	3
0	0	2.57143	4.28571	1.71429	1	41	5	2	3	1	3	4	21.32	#NULL!	21.32	1	1	2	5	3	3	3	5	3	4	3	2	1	1	1	10	1	1	25	0	1	40	0	1	5	1	1	5	1	1	47	1	4	4
1	1	3.85714	5.57143	1.71429	1	50	3	3.5	7	1	0	1	60	#NULL!	83.8	2	0	5	1	6	4	7	4	4	7	4	3	4	2	1	10	1	1	25	0	1	1	0	1	10	0	1	100	0	1	24	0	5	4
1	1	2.57143	4.28571	1.71429	0	73	5	1.5	5	2	0	2	33.52	#NULL!	33.52	1	1	4	6	5	6	2	2	1	5	1	1	1	3	1	10	1	2		0	1	25	1	1	10	0	1	1	0	2		0	5	2
1	1	2.57143	4.28571	1.71429	1	62	3	6.25	3	2	1	3	28.28	#NULL!	28.28	3	0	2	3	2	4	5	4	7	7	7	6	6	5	1	10	1	1	30	1	2		0	1	10	0	1	1	0	1	47	1	4	3
1	1	3.14286	4.85714	1.71429	0	51	5	3.5	4	1	3	4	60	#NULL!	95.9	4	1	3	6	5	5	2	3	5	7	5	5	1	3	1	10	1	1	25	0	1	4	0	1	5	1	1	5	1	1	47	1	5	3
1	1	3.14286	4.85714	1.71429	1	53	5	3	4	3	3	6	38.77	#NULL!	38.77	4	1	3	5	2	6	3	2	4	5	4	5	2	2	1	10	1	1	30	1	1	25	1	1	5	1	1	5	1	1	47	1	5	3
1	1	2.57143	4.28571	1.71429	0	47	5	3.75	7	1	1	2	60	#NULL!	189.48	3	1	5	5	6	6	3	2	4	5	4	5	5	2	1	10	1	1	25	0	2		0	1	10	0	1	100	0	1	47	1	6	4
1	1	2.57143	4.28571	1.71429	1	45	5	3.25	4	1	3	4	51.47	#NULL!	51.47	3	0	4	2	2	4	6	4	4	7	4	4	2	3	1	10	1	1	25	0	1	10	0	1	5	1	1	5	1	1	47	1	5	3
0	1	3.57143	5.28571	1.71429	1	18	2	1	7	3	0	3	28.77	#NULL!	28.77	1	0	7	2	5	7	6	1	1	4	1	2	1	1	1	10	1	1	30	1	1	25	1	1	10	0	1	100	0	1	24	0	6	4
0	0	1.28571	3	1.71429	1	43	4	1.5	6	2	2	4	21.72	#NULL!	21.72	2	1	5	6	7	7	2	1	1	4	2	4	1	2	1	10	1	1	30	1	1	40	0	1	10	0	1	5	1	1	47	1	3	2
0	0	1.28571	3	1.71429	0	60	5	5	8	3	3	6	26.68	#NULL!	26.68	3	1	6	6	3	7	2	1	2	2	5	1	7	6	1	10	1	1	30	1	1	25	1	1	5	1	1	5	1	1	47	1	3	1
1	0	3	4.71429	1.71429	0	47	5	4.5	5	3	3	6	24.5	#NULL!	24.5	4	1	4	2	3	6	6	2	5	5	5	5	5	3	1	10	1	1	30	1	1	25	1	1	5	1	1	5	1	1	47	1	6	3
1	0	2	3.71429	1.71429	1	35	5	1	6	3	1	4	15.27	#NULL!	15.27	4	1	6	6	6	4	2	4	1	1	1	1	1	1	1	10	1	1	30	1	1	25	1	1	10	0	1	5	1	2		0	4	4
1	0	2	3.71429	1.71429	1	52	3	3	6	2	0	2	30.67	#NULL!	30.67	2	1	6	6	6	4	2	4	2	5	5	5	2	3	1	10	1	1	30	1	1	10	0	1	10	0	1	1	0	1	24	0	2	1
1	0	1.14286	2.85714	1.71429	1	23	5	1	7	3	3	6	18.63	#NULL!	18.63	2	1	6	1	2	7	7	1	1	1	1	5	1	1	1	10	1	1	30	1	1	25	1	1	5	1	1	5	1	1	47	1	2	2
0	0	2.14286	3.85714	1.71429	1	32	4	2.5	5	2	2	4	20.2	#NULL!	20.2	3	1	4	4	5	6	4	2	4	4	2	3	1	3	1	10	1	2		0	1	25	1	1	5	1	1	100	0	1	47	1	3	3
0	0	2	3.71429	1.71429	1	39	3	1	5	2	1	3	39.98	#NULL!	39.98	3	1	3	7	7	7	1	1	1	1	1	1	1	1	1	10	1	1	30	1	1	40	0	1	10	0	1	5	1	1	24	0	5	2
0	0	2.71429	4.42857	1.71429	1	62	5	1.25	2	1	2	3	60	#NULL!	103.1	3	1	1	7	7	6	1	2	1	2	1	5	1	2	1	10	1	1	33	0	1	20	0	1	10	0	1	5	1	1	47	1	5	2
0	0	1.14286	2.85714	1.71429	0	30	3	3.5	8	0	0	0	18.75	#NULL!	18.75	1	0	2	5	5	6	3	2	5	5	5	2	2	2	2		0	2		0	2		0	1	10	0	1	100	0	1	48	0	1	1
1	1	3.28571	5	1.71429	0	66	2	2.25	5	1	1	2	60	#NULL!	63.03	3	0	2	2	4	3	6	5	2	4	4	5	2	1	1	10	1	1	20	0	2		0	1	10	0	1	5	1	1	24	0	5	3
1	1	3.71429	5.42857	1.71429	0	70	5	2.75	6	1	0	1	27.82	#NULL!	27.82	3	0	6	3	5	6	5	2	4	4	4	4	2	1	1	10	1	2		0	2		0	1	100	0	2		0	1	24	0	4	3
1	1	3.28571	5	1.71429	0	43	4	1.5	6	1	0	1	22.93	#NULL!	22.93	2	1	1	5	3	7	3	1	2	6	1	3	1	2	1	10	1	2		0	1	30	0	1	10	0	2		0	1	23	0	5	4
1	1	2.71429	4.42857	1.71429	1	47	3	2.25	7	1	1	2	29.37	#NULL!	29.37	3	1	4	6	7	6	2	2	6	7	1	7	1	1	1	10	1	1	2/3	0	1	10	0	1	10	0	1	5	1	1	24	0	5	3
1	1	2.28571	4	1.71429	1	53	3	1	6	1	1	2	22.8	#NULL!	22.8	2	0	3	5	6	7	3	1	1	5	1	5	1	1	1	10	1	2		0	1	20	0	1	10	0	1	5	1	1	24	0	5	2
1	1	3	4.71429	1.71429	0	44	5	3	7	2	3	5	60	#NULL!	62.87	2	0	6	2	3	6	6	2	5	5	5	5	1	1	1	10	1	1	25	0	1	25	1	1	5	1	1	5	1	1	47	1	6	5
1	1	2.14286	3.85714	1.71429	0	60	2	5.25	4	1	1	2	43.87	#NULL!	43.87	3	0	2	4	3	4	4	4	5	4	5	5	5	6	1	10	1	1	25	0	1	33	0	1	10	0	1	100	0	1	47	1	5	3
1	1	2.28571	4	1.71429	0	35	3	4	1	2	1	3	38.87	#NULL!	38.87	4	1	1	2	2	1	6	7	7	7	7	7	1	1	1	10	1	1	30	1	1	12,5	0	1	5	1	1	500	0	2		0	4	3
1	1	2	3.71429	1.71429	1	38	5	5	6	2	3	5	48.13	#NULL!	48.13	4	1	5	5	3	5	3	3	3	4	5	3	5	7	1	10	1	1	30	1	1	40	0	1	5	1	1	5	1	1	47	1	4	2
1	1	2	3.71429	1.71429	1	53	5	1.5	7	2	2	4	39.3	#NULL!	39.3	4	1	6	3	6	6	5	2	2	3	1	1	1	2	1	10	1	1	30	1	1	75	0	1	5	1	1	100	0	1	47	1	4	2
1	1	2.28571	4	1.71429	1	57	4	2.25	6	1	2	3	27.45	#NULL!	27.45	2	1	6	2	3	6	6	2	5	1	1	5	1	2	1	10	1	1	25	0	1	10	0	1	10	0	1	5	1	1	47	1	4	3
1	1	1	2.71429	1.71429	0	41	5	5	3	1	0	1	60	#NULL!	76.4	1	0	3	2	3	4	6	4	5	6	6	4	6	3	1	10	1	2		0	1	30	0	1	10	0	1	100	0	2		0	3	1
1	1	1.85714	3.57143	1.71429	1	37	5	2	3	2	2	4	60	#NULL!	88.27	2	1	3	2	2	3	6	5	5	1	1	5	1	1	1	10	1	1	30	1	1	33	0	1	5	1	1	5	1	1	24	0	5	4
1	1	1	2.71429	1.71429	1	57	5	2.75	6	3	1	4	32.22	#NULL!	32.22	4	0	4	3	4	5	5	3	4	4	4	4	1	2	1	10	1	1	30	1	1	25	1	1	5	1	1	100	0	2		0	3	1
0	1	1.85714	3.57143	1.71429	1	53	3	1	5	2	3	5	23.98	#NULL!	23.98	2	1	4	4	4	4	4	4	1	1	1	4	1	1	1	10	1	1	30	1	1	30	0	1	5	1	1	5	1	1	47	1	4	2
0	1	1.14286	2.85714	1.71429	1	69	3	1	6	1	1	2	44.1	#NULL!	44.1	1	1	6	2	6	2	6	6	1	1	1	1	1	1	1	10	1	1	0	0	1	10	0	1	10	0	1	5	1	1	24	0	1	1
0	0	2.42857	4.14286	1.71429	0	49	3	2.5	5	0	1	1	14.23	#NULL!	14.23	4	0	2	4	4	4	4	4	4	4	4	4	1	1	1	100	0	2		0	2		0	1	10	0	1	5	1	2		0	4	2
1	1	2.42857	4.14286	1.71429	0	70	5	5.25	9	0	0	0	39.85	#NULL!	39.85	4	0	5	6	5	4	2	4	4	4	5	5	5	7	2		0	1	5	0	2		0	1	10	0	1	500	0	1	24	0	3	2
1	1	2.42857	4.14286	1.71429	1	64	4	4.25	8	1	1	2	21.23	#NULL!	21.23	1	1	6	2	6	4	6	4	6	6	6	5	2	3	1	10	1	2		0	2		0	1	10	0	1	5	1	1	24	0	5	2
1	1	2.42857	4.14286	1.71429	1	45	5	1.5	6	3	1	4	19.6	#NULL!	19.6	2	0	5	5	4	6	3	2	2	5	1	5	1	2	1	10	1	1	30	1	1	25	1	1	10	0	1	500	0	1	47	1	4	2
1	1	2.42857	4.14286	1.71429	1	37	5	5.5	6	1	0	1	27.65	#NULL!	27.65	4	1	5	3	5	7	5	1	5	7	7	7	6	4	1	10	1	2		0	2		0	1	10	0	2		0	2		0	5	2
0	1	3.42857	5.14286	1.71429	0	36	3	2.75	9	1	1	2	15.72	#NULL!	15.72	3	1	6	7	6	4	1	4	4	3	4	2	1	2	1	10	1	2		0	2		0	2		0	2		0	1	47	1	4	4
1	0	3	4.85714	1.85714	0	49	3	3	6	0	1	1	60	#NULL!	67.28	3	0	3	4	5	3	4	5	4	4	4	3	2	2	1	1	0	2		0	2		0	1	10	0	1	5	1	1	24	0	6	3
0	0	3	4.85714	1.85714	0	64	5	1	3	2	0	2	15.43	#NULL!	15.43	2	0	1	3	4	4	5	4	1	1	1	2	1	1	1	10	1	2		0	1	25	1	1	10	0	1	1	0	2		0	3	3
1	1	4.14286	6	1.85714	0	39	5	6	5	1	0	1	16.93	#NULL!	16.93	2	1	1	2	5	3	6	5	6	5	5	3	6	7	1	10 %	1	1	5	0	2		0	1	10	0	1	1000	0	1	24	0	6	3
1	1	3.71429	5.57143	1.85714	1	50	5	4.5	7	1	1	2	33.13	#NULL!	33.13	4	0	7	7	2	7	1	1	5	5	5	5	5	3	1	10	1	2		0	2		0	1	10	0	1	5	1	1	24	0	5	6
1	1	3	4.85714	1.85714	0	40	5	2.75	7	2	2	4	23.8	#NULL!	23.8	2	1	6	6	5	5	2	3	4	4	3	3	2	2	1	10	1	2		0	1	25	1	1	10	0	1	5	1	1	47	1	5	3
1	1	2.71429	4.57143	1.85714	1	44	5	4.5	7	2	3	5	22.07	#NULL!	22.07	4	0	2	2	6	7	6	1	4	7	1	1	6	7	1	1	0	1	30	1	1	25	1	1	5	1	1	5	1	1	47	1	6	3
0	1	2.71429	4.57143	1.85714	0	52	5	3.75	7	0	1	1	20.23	#NULL!	20.23	3	1	1	7	2	3	1	5	4	4	4	4	4	3	2		0	1	15	0	2		0	1	10	0	1	5	1	1	24	0	4	3
0	1	3.71429	5.57143	1.85714	1	49	3	2.75	3	0	0	0	43.33	#NULL!	43.33	1	1	4	3	4	5	5	3	4	4	4	2	1	2	1	100	0	1	20	0	1	15	0	1	10	0	1	120	0	1	24	0	6	4
1	0	1.57143	3.42857	1.85714	0	63	5	4.75	6	1	2	3	25.8	#NULL!	25.8	2	1	5	6	1	4	2	4	5	4	5	5	6	3	1	10	1	2		0	1	40	0	1	10	0	1	5	1	1	47	1	4	1
0	1	1.57143	3.42857	1.85714	0	58	5	1.75	6	2	2	4	31.52	#NULL!	31.52	1	0	5	2	2	6	6	2	2	2	2	2	1	2	1	10	1	1	30	1	1	20	0	1	5	1	1	5	1	2		0	5	2
1	0	3.14286	5	1.85714	1	37	3	1.75	3	3	3	6	22.25	#NULL!	22.25	1	1	2	6	6	5	2	3	1	1	4	2	1	1	1	10	1	1	30	1	1	25	1	1	5	1	1	5	1	1	47	1	6	3
1	0	3.85714	5.71429	1.85714	1	52	3	5	8	3	3	6	60	#NULL!	280	1	1	6	6	7	6	2	2	4	5	4	2	6	6	1	10	1	1	30	1	1	25	1	1	5	1	1	5	1	1	47	1	6	4
1	0	2.14286	4	1.85714	1	39	5	4.75	2	2	1	3	60	#NULL!	62	3	1	1	1	1	3	7	5	6	7	6	6	5	2	1	10	1	1	25	0	1	25	1	1	100	0	1	5	1	1	24	0	4	3
1	0	1.85714	3.71429	1.85714	1	30	3	2	6	3	2	5	43.27	#NULL!	43.27	4	1	5	2	5	4	6	4	3	5	3	3	1	1	1	10	1	1	30	1	1	25	1	1	10	0	1	5	1	1	47	1	4	3
0	0	2.85714	4.71429	1.85714	1	58	3	1.75	7	2	1	3	26.18	#NULL!	26.18	4	0	6	6	6	6	2	2	3	2	2	3	1	1	1	10	1	1	30	1	1	4	0	1	10	0	1	5	1	1	12	0	5	3
1	1	3.14286	5	1.85714	0	70	5	4.5	5	0	0	0	23.5	#NULL!	23.5	1	0	4	3	1	2	5	6	5	4	4	5	5	4	2		0	2		0	2		0	1	10	0	2		0	2		0	6	3
1	1	3.85714	5.71429	1.85714	0	68	4	4.25	3	0	0	0	21	#NULL!	21	3	0	3	1	3	6	7	2	4	4	5	5	5	3	2		0	1	45	0	2		0	1	10	0	2		0	2		0	6	3
1	1	2.85714	4.71429	1.85714	0	71	4	3	7	1	0	1	27.77	#NULL!	27.77	4	0	7	4	6	7	4	1	4	6	6	4	1	1	1	10	1	1	25	0	1	40	0	1	0	0	2		0	2		0	5	4
1	1	3.14286	5	1.85714	1	59	5	2	2	3	2	5	60	#NULL!	328.67	1	1	2	4	1	6	4	2	4	6	2	6	1	1	1	10	1	1	30	1	1	25	1	1	10	0	1	5	1	1	47	1	5	4
1	1	2.42857	4.28571	1.85714	1	50	3	1	3	1	1	2	41.33	#NULL!	41.33	3	1	1	3	3	4	5	4	1	6	1	7	1	1	1	10	1	1	25	0	1	10	0	1	10	0	1	5	1	1	24	0	5	2
1	1	2.14286	4	1.85714	0	51	3	2.25	3	1	2	3	23.32	#NULL!	23.32	4	0	1	5	3	3	3	5	1	4	4	4	2	2	1	10	1	1	25	0	1	40	0	1	5	1	1	5	1	1	24	0	4	1
1	1	2	3.85714	1.85714	0	50	5	1.25	7	2	3	5	31.37	#NULL!	31.37	3	0	7	2	5	7	6	1	2	4	1	4	1	1	1	10	1	1	25	0	1	25	1	1	5	1	1	5	1	1	47	1	2	1
1	1	2	3.85714	1.85714	1	58	4	2	7	2	1	3	37	#NULL!	37	3	0	5	6	3	5	2	3	2	6	2	4	2	2	1	10	1	1	25	0	1	25	1	1	5	1	1	500	0	2		0	3	2
1	1	2.42857	4.28571	1.85714	1	71	2	2.5	6	1	1	2	27.33	#NULL!	27.33	3	0	5	2	6	6	6	2	4	4	4	4	1	1	1	10	1	2		0	2		0	1	10	0	1	5	1	2		0	5	3
1	1	2.85714	4.71429	1.85714	0	57	5	4	5	0	1	1	26.47	#NULL!	26.47	4	1	3	7	5	7	1	1	6	5	5	4	3	2	1	1	0	1	25	0	1	20	0	1	10	0	1	1	0	1	47	1	3	4
1	1	2.42857	4.28571	1.85714	0	51	5	1.75	6	2	2	4	60	#NULL!	207.62	2	0	3	3	3	6	5	2	4	4	1	4	1	1	1	10	1	1	30	1	1	40	0	1	5	1	2		0	1	47	1	5	3
1	1	2	3.85714	1.85714	0	61	3	2	6	3	1	4	19.63	#NULL!	19.63	4	1	5	5	5	3	3	5	2	6	2	2	1	3	1	10	1	1	30	1	1	25	1	1	10	0	1	500	0	1	47	1	5	2
1	1	2	3.85714	1.85714	0	23	3	3.5	3	1	1	2	33.92	#NULL!	33.92	1	0	1	1	2	3	7	5	6	6	6	5	1	1	1	10	1	1	20	0	1	10%	0	1	1	0	1	5	1	1	24	0	4	3
1	1	2	3.85714	1.85714	1	63	5	1.5	3	1	3	4	60	#NULL!	61.9	2	0	2	2	5	6	6	2	2	2	2	5	1	1	1	10	1	1	0-50	0	1	33	0	1	5	1	1	5	1	1	47	1	4	2
1	1	2.14286	4	1.85714	1	44	3	1.5	7	2	3	5	33.77	#NULL!	33.77	1	1	6	6	6	6	2	2	1	1	2	3	2	1	1	10	1	1	33	0	1	25	1	1	5	1	1	5	1	1	47	1	4	2
1	1	1.14286	3	1.85714	0	44	5	4.75	6	1	0	1	16.9	#NULL!	16.9	1	0	1	5	1	2	3	6	4	6	6	4	3	6	1	10	1	1	12	0	2		0	1	10	0	1	500	0	1	24	0	1	1
1	1	1	2.85714	1.85714	1	73	5	3.75	5	2	3	5	60	#NULL!	138.08	3	0	2	4	4	2	4	6	5	5	5	6	2	3	1	10	1	1	30	1	1	10	0	1	5	1	1	5	1	1	47	1	2	1
0	1	3.57143	5.42857	1.85714	1	67	2	3.5	7	1	0	1	24.53	#NULL!	24.53	3	1	6	5	5	3	3	5	5	4	5	5	2	2	1	10	1	1	25	0	1	20	0	1	10	0	1	90	0	1	25	0	5	4
0	1	2	3.85714	1.85714	1	46	3	1	6	3	3	6	34.43	#NULL!	34.43	4	1	5	1	6	4	7	4	1	5	1	2	1	1	1	10	1	1	30	1	1	25	1	1	5	1	1	5	1	1	47	1	3	1
0	1	2.57143	4.42857	1.85714	0	65	5	6	7	0	0	0	29.98	#NULL!	29.98	3	1	3	7	6	7	1	1	6	6	5	2	6	7	1	1	0	2		0	1	20	0	1	10	0	1	100	0	1	24	0	4	2
0	1	2.85714	4.71429	1.85714	0	43	3	1	2	1	1	2	46.48	#NULL!	46.48	3	0	2	7	2	7	1	1	1	6	1	1	1	1	1	1	0	1	25	0	1	25	1	1	10	0	2		0	1	47	1	5	3
0	1	3.14286	5	1.85714	0	54	2	4	1	0	1	1	14.25	#NULL!	14.25	4	1	2	4	4	4	4	4	6	6	6	4	3	1	2		0	2		0	1	20	0	1	10	0	1	5	1	1	5	0	3	3
0	1	2.57143	4.42857	1.85714	1	57	5	3.25	7	1	0	1	19.95	#NULL!	19.95	4	0	4	5	5	5	3	3	4	4	4	5	2	3	1	10	1	1	25	0	1	30	0	1	10	0	1	10000	0	1	24	0	4	3
0	1	2	3.85714	1.85714	0	46	5	4.5	5	0	0	0	26.53	#NULL!	26.53	4	1	2	3	2	6	5	2	5	7	7	5	4	2	1	100	0	2		0	1	10	0	1	10	0	1	100	0	1	24	0	3	1
0	1	2.14286	4	1.85714	0	51	3	1	2	0	2	2	49.13	#NULL!	49.13	2	0	1	6	4	4	2	4	1	1	1	1	1	1	1	1	0	1	20	0	1	10	0	1	5	1	1	5	1	2		0	5	2
1	0	1.71429	3.57143	1.85714	0	56	5	2.75	5	0	2	2	35.8	#NULL!	35.8	2	0	2	5	4	4	3	4	4	5	4	4	1	2	1	1%	0	1	25	0	2		0	1	105	0	1	5	1	1	47	1	4	1
1	1	1.71429	3.57143	1.85714	0	47	5	1	4	0	0	0	28.58	#NULL!	28.58	3	0	5	2	1	4	6	4	1	4	1	3	1	1	2		0	2		0	2		0	1	10	0	2		0	2		0	4	2
0	1	1.71429	3.57143	1.85714	0	28	5	4.25	4	1	0	1	41.5	#NULL!	41.5	4	0	3	3	4	4	5	4	5	4	4	5	5	3	1	10	1	2		0	1	10	0	1	10	0	1	100	0	1	24	0	4	2
1	0	2.28571	4.14286	1.85714	1	74	5	1.75	4	2	1	3	37.3	#NULL!	37.3	3	1	3	4	3	6	4	2	2	4	2	5	2	1	1	10	1	1	30	1	1	75	0	1	10	0	1	1	0	1	47	1	4	2
1	1	3.28571	5.14286	1.85714	0	69	2	3.5	5	0	0	0	36.27	#NULL!	36.27	2	1	4	6	5	4	2	4	4	5	4	3	4	2	2		0	2		0	2		0	2		0	2		0	2		0	5	2
1	1	3.28571	5.14286	1.85714	0	41	3	1.75	3	1	1	2	23.45	#NULL!	23.45	1	0	3	5	5	2	3	6	2	5	1	2	1	3	1	10	1	1	25	0	1	40	0	2		0	1	100	0	1	47	1	6	3
1	1	2.28571	4.14286	1.85714	0	54	5	2.75	6	1	1	2	28.55	#NULL!	28.55	2	0	5	5	5	5	3	3	4	5	4	4	2	1	1	10	1	1	25	0	1	10	0	1	10	0	1	5	1	1	24	0	2	2
1	1	3.28571	5.14286	1.85714	0	57	5	4.25	3	1	0	1	28.67	#NULL!	28.67	3	0	1	2	2	4	6	4	7	7	7	7	2	1	1	10	1	2		0	2		0	1	10	0	1	100	0	2		0	6	1
0	1	3.28571	5.14286	1.85714	0	72	3	2.5	3	1	0	1	29.95	#NULL!	29.95	3	1	3	2	2	6	6	2	4	4	4	6	1	1	1	10	1	1	25	0	1	10	0	1	10	0	1	100	0	1	24	0	5	3
0	1	3.28571	5.14286	1.85714	0	53	5	2	4	2	1	3	23.28	#NULL!	23.28	3	0	4	5	3	5	3	3	1	2	2	3	2	3	1	10	1	1	30	1	1	30	0	1	10	0	1	100	0	1	47	1	6	4
0	1	2.28571	4.14286	1.85714	0	47	3	1.25	4	1	3	4	47.82	#NULL!	47.82	2	1	4	2	5	3	6	5	1	1	2	3	1	1	2		0	1	25	0	1	25	1	1	5	1	1	5	1	1	47	1	4	3
1	0	2.57143	4.57143	2	1	25	4	2	5	2	3	5	20.42	#NULL!	20.42	2	1	5	4	4	6	4	2	3	6	2	2	2	1	1	10	1	1	10	0	1	25	1	1	5	1	1	5	1	1	47	1	5	2
1	0	2.57143	4.57143	2	1	53	5	4.5	7	2	3	5	48.98	#NULL!	48.98	2	1	6	2	5	5	6	3	5	4	5	6	5	3	1	10	1	2		0	1	25	1	1	5	1	1	5	1	1	47	1	5	1
1	1	2.85714	4.85714	2	0	35	5	3	9	2	3	5	23.2	#NULL!	23.2	1	0	5	7	6	1	1	7	3	3	5	5	2	2	1	10	1	1	25	0	1	25	1	1	5	1	1	5	1	1	47	1	3	3
1	1	2.57143	4.57143	2	0	62	4	3.75	3	2	2	4	56.52	#NULL!	56.52	4	0	2	4	3	5	4	3	5	5	5	4	3	2	1	10	1	1	30	1	1	60	0	1	10	0	1	5	1	1	47	1	6	3
1	1	2.57143	4.57143	2	1	38	5	3	6	2	2	4	17.03	#NULL!	17.03	2	1	4	3	4	3	5	5	4	4	4	4	2	2	1	10	1	1	25	0	1	25	1	1	5	1	1	5	1	1	24	0	4	2
1	1	2.57143	4.57143	2	0	33	5	1.75	6	3	1	4	27.35	#NULL!	27.35	2	1	5	1	5	6	7	2	2	5	1	2	1	3	1	10	1	1	30	1	1	25	1	1	10	0	1	100	0	1	47	1	6	4
1	1	1.42857	3.42857	2	0	71	5	3	5	2	3	5	42.73	#NULL!	42.73	2	0	6	3	4	4	5	4	4	4	3	4	3	2	1	10	1	1	30	1	2		0	1	5	1	1	5	1	1	47	1	2	1
1	0	3.28571	5.28571	2	0	40	4	4.25	4	0	0	0	36.82	#NULL!	36.82	3	1	1	2	2	6	6	2	5	7	7	1	1	4	1	1	0	1	25	0	2		0	1	10	0	2		0	1	24	0	6	4
1	0	2.71429	4.71429	2	1	61	3	2.25	3	2	0	2	43.68	#NULL!	43.68	2	0	1	4	4	6	4	2	3	7	4	6	1	1	1	10	1	1	20	0	1	25	1	1	10	0	1	1	0	2		0	6	2
0	0	3	5	2	0	33	5	4.5	7	0	3	3	47.25	#NULL!	47.25	3	1	6	2	4	7	6	1	4	5	7	7	3	4	1	1	0	1	50	0	1	10%	0	1	5	1	1	5	1	1	47	1	5	3
0	0	3	5	2	1	51	3	1.5	6	1	1	2	23.22	#NULL!	23.22	4	0	1	5	7	7	3	1	1	4	3	1	1	1	1	10	1	1	25	0	1	10	0	1	10	0	1	5	1	1	24	0	5	3
0	0	2.28571	4.28571	2	1	53	2	1	7	1	0	1	15.72	#NULL!	15.72	2	0	3	3	4	3	5	5	1	4	1	1	1	1	1	10	1	2		0	2		0	1	9	0	1	100	0	1	24	0	4	3
1	1	3	5	2	0	55	3	4.25	8	3	2	5	39.78	#NULL!	39.78	2	0	4	6	6	4	2	4	4	4	5	4	5	3	1	10	1	1	30	1	1	25	1	1	5	1	2		0	1	47	1	6	2
1	1	3	5	2	1	37	5	2.5	4	3	2	5	60	#NULL!	114.65	1	1	3	3	2	5	5	3	4	1	1	2	2	3	1	10	1	1	30	1	1	25	1	1	8,9	0	1	5	1	1	47	1	5	1
1	1	2.71429	4.71429	2	0	51	5	4	5	1	0	1	22.12	#NULL!	22.12	1	0	4	6	4	2	2	6	1	1	1	5	7	7	1	10	1	2		0	1	40%	0	1	10	0	1	500	0	1	24	0	4	3
1	1	2.71429	4.71429	2	0	48	5	6	6	1	2	3	32.28	#NULL!	32.28	4	1	4	2	2	5	6	3	7	7	7	3	6	4	1	10	1	1	25	0	2		0	1	10	0	1	5	1	1	47	1	5	3
1	1	2.71429	4.71429	2	0	41	5	4.25	7	3	3	6	60	#NULL!	154.3	3	1	5	2	2	6	6	2	6	6	4	6	5	2	1	10	1	1	30	1	1	25	1	1	5	1	1	5	1	1	47	1	5	3
1	1	2.71429	4.71429	2	0	57	5	2.75	6	0	0	0	17.9	#NULL!	17.9	2	0	4	3	6	3	5	5	4	4	4	2	2	1	1	1	0	2		0	2		0	1	10	0	1	100	0	1	24	0	5	3
1	1	2.71429	4.71429	2	0	51	3	2.75	3	0	0	0	40.93	#NULL!	40.93	2	0	2	1	1	7	7	1	4	5	5	6	1	1	1	100	0	2		0	1	20	0	1	10	0	1	100	0	1	24	0	5	2
1	1	2.71429	4.71429	2	1	49	4	1.25	4	2	1	3	25.78	#NULL!	25.78	4	1	2	6	4	6	2	2	1	1	1	1	1	2	1	10	1	1	30	1	2		0	1	10	0	1	5	1	2		0	5	2
1	1	2	4	2	0	63	4	4	6	1	0	1	49.85	#NULL!	49.85	3	1	3	2	3	6	6	2	2	4	5	2	5	4	1	10	1	2		0	2		0	1	10	0	1	100	0	2		0	5	4
1	1	2	4	2	0	73	4	3.5	2	1	0	1	37.32	#NULL!	37.32	4	0	2	2	2	5	6	3	4	4	4	4	4	2	1	10	1	1	8	0	1	35	0	1	10	0	1	100	0	1	24	0	4	1
1	1	1.85714	3.85714	2	0	61	5	1.75	6	0	0	0	58.15	#NULL!	58.15	3	0	3	3	5	5	5	3	2	3	2	2	1	2	1	1	0	1	25	0	1	60	0	1	10	0	2		0	2		0	5	2
1	1	1.71429	3.71429	2	1	50	3	1.25	6	2	0	2	26.43	#NULL!	26.43	1	1	5	2	5	2	6	6	2	4	1	2	1	1	1	10	1	1	30	1	1	40	0	1	10	0	1	500	0	1	24	0	5	1
1	1	1	3	2	0	32	5	2.75	5	1	1	2	22.48	#NULL!	22.48	2	0	5	4	5	4	4	4	4	4	4	2	2	1	1	10	1	2		0	2		0	1	10	0	1	5	1	2		0	1	1
1	1	1	3	2	1	34	5	1	4	3	3	6	18.92	#NULL!	18.92	2	1	7	3	5	5	5	3	1	1	1	1	1	1	1	10	1	1	30	1	1	25	1	1	5	1	1	5	1	1	47	1	4	1
0	1	4	6	2	1	71	5	4.25	8	1	1	2	50.48	#NULL!	50.48	2	1	6	1	1	4	7	4	4	4	5	3	5	3	1	10	1	2		0	2		0	1	10	0	1	5	1	1	24	0	6	5
0	1	2.71429	4.71429	2	1	75	5	2	6	2	0	2	25.65	#NULL!	25.65	2	0	1	7	4	7	1	1	4	4	1	4	1	2	1	10	1	1	30	1	1	30	0	1	10	0	1	1	0	2		0	6	1
0	1	3.28571	5.28571	2	0	60	4	3	3	2	2	4	60	#NULL!	92.32	1	1	2	4	5	4	4	4	5	7	4	5	1	2	1	10	1	2		0	1	25	1	1	10	0	1	5	1	1	47	1	6	3
0	1	3	5	2	1	61	4	3.75	5	1	2	3	24.68	#NULL!	24.68	4	0	4	2	4	6	6	2	4	5	4	4	4	3	1	1	0	1	30	1	1	20	0	1	10	0	1	5	1	1	47	1	6	3
0	1	2	4	2	1	69	5	2	5	2	0	2	60	#NULL!	65.97	3	1	4	3	4	5	5	3	5	6	1	6	1	1	1	10	1	1	30	1	1	40	0	1	10	0	1	12	0	1	7	0	5	2
0	1	1.85714	3.85714	2	0	70	3	2	6	1	0	1	30.92	#NULL!	30.92	3	0	7	1	4	5	7	3	4	1	1	5	1	2	1	10	1	2		0	2		0	1	10	0	1	1	0	2		0	2	1
0	1	1.71429	3.71429	2	1	72	4	3.5	4	3	2	5	55.93	#NULL!	55.93	2	1	2	2	3	6	6	2	4	4	5	5	3	2	1	10	1	1	30	1	1	25	1	1	5	1	1	20	0	1	47	1	4	1
0	1	1.71429	3.71429	2	0	68	5	4.75	6	0	0	0	41.45	#NULL!	41.45	3	1	3	3	2	4	5	4	4	5	4	5	6	5	1	100	0	1	25	0	1	10	0	1	10	0	1	100	0	1	24	0	4	2
1	0	2.14286	4.14286	2	1	20	2	1	3	3	3	6	48.87	#NULL!	48.87	4	1	3	2	5	7	6	1	1	1	1	1	1	1	1	10	1	1	30	1	1	25	1	1	5	1	1	5	1	1	47	1	4	2
1	0	2.42857	4.42857	2	1	27	5	3.25	4	3	3	6	60	#NULL!	67.77	3	1	3	3	3	6	5	2	2	7	4	6	3	4	1	10	1	1	30	1	1	25	1	1	5	1	1	5	1	1	47	1	5	4
1	0	2.14286	4.14286	2	1	49	3	1	7	1	3	4	60	#NULL!	415.23	1	0	4	2	3	3	6	5	1	5	1	6	1	1	1	10	1	1	25	0	1	40	0	1	5	1	1	5	1	1	47	1	4	4
1	1	2.42857	4.42857	2	0	60	3	4.5	4	0	0	0	25.02	#NULL!	25.02	1	0	2	5	4	5	3	3	6	6	6	6	2	4	1	200	0	2		0	1	10	0	1	10	0	2		0	2		0	5	2
1	1	2.14286	4.14286	2	1	55	4	5	5	2	2	4	25.35	#NULL!	25.35	3	1	4	5	6	6	3	2	3	5	4	5	6	7	1	10	1	2		0	1	25	1	1	10	0	1	5	1	1	47	1	5	2
1	1	2.42857	4.42857	2	1	43	4	3.75	4	3	1	4	53.28	#NULL!	53.28	2	1	2	1	5	7	7	1	4	4	4	6	4	3	1	10	1	1	30	1	1	25	1	1	10	0	2		0	1	47	1	4	5
0	1	3.42857	5.42857	2	0	40	3	1	5	1	1	2	25.15	#NULL!	25.15	3	0	2	5	2	7	3	1	1	4	1	4	1	1	1	10	1	2		0	1	20	0	1	10	0	1	100	0	1	47	1	5	3
0	1	2.14286	4.14286	2	1	42	2	1	6	1	2	3	22.83	#NULL!	22.83	4	0	5	4	4	3	4	5	1	1	1	1	1	1	1	10	1	1	25	0	1	10	0	1	10	0	1	5	1	1	47	1	5	2
1	1	2.71429	4.85714	2.14286	0	53	5	4.5	3	3	0	3	26.2	#NULL!	26.2	3	0	1	1	1	6	7	2	4	4	5	5	6	3	1	10	1	1	30	1	1	25	1	1	105	0	1	100	0	1	7	0	6	4
1	1	1.28571	3.42857	2.14286	1	43	5	1.25	7	2	2	4	16.37	#NULL!	16.37	2	1	4	4	5	3	4	5	1	6	1	3	1	2	1	10	1	1	30	1	1	10	0	1	10	0	1	5	1	1	47	1	4	2
0	1	2.71429	4.85714	2.14286	0	70	5	3.5	6	0	1	1	46.65	#NULL!	46.65	3	1	3	6	6	5	2	3	4	4	4	4	5	1	1	1	0	2		0	2		0	1	10	0	1	5	1	1	0	0	3	1
0	1	1.28571	3.42857	2.14286	0	49	5	1	7	2	2	4	26.95	#NULL!	26.95	3	1	6	2	2	6	6	2	1	4	1	3	1	1	1	10	1	1	30	1	1	10	0	1	10	0	1	5	1	1	47	1	3	1
0	1	1.28571	3.42857	2.14286	0	55	5	1.75	6	1	3	4	35.75	#NULL!	35.75	1	1	2	3	4	4	5	4	4	4	1	4	1	1	1	10	1	1	75	0	1	40	0	1	5	1	1	5	1	1	47	1	4	2
1	0	2.42857	4.57143	2.14286	0	43	3	4.25	2	2	1	3	37.43	#NULL!	37.43	3	0	1	2	1	4	6	4	5	7	5	5	3	4	1	10	1	1	25	0	1	25	1	1	10	0	1	100	0	1	47	1	3	1
0	0	3.42857	5.57143	2.14286	1	67	3	3.25	5	0	0	0	21.88	#NULL!	21.88	1	0	1	4	4	7	4	1	5	4	3	2	2	3	1	100	0	1	25	0	1	20	0	1	10	0	1	100	0	1	12	0	6	6
0	0	1	3.14286	2.14286	1	57	5	1	3	1	0	1	38.48	#NULL!	38.48	2	1	1	1	4	4	7	4	1	1	1	1	1	1	1	10st	1	1	25 gånger	0	1	10	0	1	10	0	1	100	0	1	24	0	1	1
1	1	3.14286	5.28571	2.14286	0	52	3	1	8	1	0	1	41.4	#NULL!	41.4	3	0	7	2	4	6	6	2	1	1	1	1	1	1	1	10	1	2		0	2		0	1	10	0	2		0	1	12	0	6	2
1	1	3.42857	5.57143	2.14286	0	47	5	3.25	2	1	0	1	30.93	#NULL!	30.93	3	0	1	3	1	6	5	2	4	6	5	6	1	3	1	10	1	2		0	2		0	1	10	0	1	100	0	1	24	0	6	4
1	1	2.85714	5	2.14286	0	58	3	1.5	5	0	0	0	47.87	#NULL!	47.87	1	0	5	4	4	4	4	4	3	2	1	2	1	1	1	1	0	2		0	2		0	1	10	0	1	500	0	2		0	5	2
1	1	2.42857	4.57143	2.14286	1	71	4	2.5	8	0	0	0	22.83	#NULL!	22.83	4	0	6	7	7	6	1	2	2	4	4	2	2	2	1	100	0	1	25	0	2		0	1	10	0	2		0	1	24	0	5	2
1	1	2.42857	4.57143	2.14286	0	46	5	2.5	5	1	2	3	28.63	#NULL!	28.63	4	0	5	6	6	4	2	4	4	3	4	2	1	1	1	10	1	1	3/5	0	1	5	0	1	10	0	1	5	1	1	47	1	5	2
1	1	2.42857	4.57143	2.14286	1	75	4	3.5	6	1	0	1	54.03	#NULL!	54.03	3	1	5	5	3	4	3	4	3	5	5	5	3	3	1	10	1	1	35	0	1	10	0	1	10	0	1	20	0	1	12	0	5	2
1	1	2.14286	4.28571	2.14286	1	71	3	5.5	3	1	3	4	32.05	#NULL!	32.05	2	0	1	5	2	3	3	5	5	5	5	4	5	7	1	10	1	1	40	0	1	10	0	1	5	1	1	5	1	1	47	1	4	2
1	1	2.57143	4.71429	2.14286	1	39	3	4.25	5	1	0	1	38.75	#NULL!	38.75	2	1	5	4	6	6	4	2	5	4	6	2	4	2	2		0	1	30	1	2		0	1	10	0	1	100	0	1	24	0	5	3
1	1	2.14286	4.28571	2.14286	1	49	3	3	6	2	2	4	60	#NULL!	77.6	2	0	3	3	3	6	5	2	4	4	5	5	1	2	1	10	1	1	25	0	1	25	1	1	5	1	1	100	0	1	47	1	5	2
1	1	1.85714	4	2.14286	0	50	4	3.25	4	1	2	3	30.77	#NULL!	30.77	1	1	4	2	4	5	6	3	4	4	4	4	2	3	1	10	1	1	25	0	1	40	0	1	5	1	1	100	0	1	47	1	4	3
0	1	2.85714	5	2.14286	0	58	3	7	5	0	2	2	40.37	#NULL!	40.37	4	0	4	5	5	5	3	3	7	7	7	7	7	7	1	100	0	2		0	1	20%	0	1	5	1	1	5	1	2		0	5	4
0	1	1.85714	4	2.14286	0	68	2	1.5	7	0	0	0	34.03	#NULL!	34.03	2	1	4	6	7	1	2	7	1	1	1	1	1	3	2		0	2		0	2		0	2		0	2		0	2		0	5	2
1	0	1.57143	3.71429	2.14286	1	51	2	3.5	4	1	0	1	27.48	#NULL!	27.48	1	0	2	1	2	4	7	4	5	4	4	5	2	3	1	100	0	1	25	0	1	25	1	1	10	0	1	100	0	1	24	0	3	1
1	0	2.28571	4.42857	2.14286	0	56	3	2	3	2	1	3	19.48	#NULL!	19.48	4	1	3	1	3	4	7	4	3	7	3	7	1	1	1	10	1	1	25	0	1	25	1	1	10	0	1	100	0	1	47	1	5	3
1	0	2	4.14286	2.14286	1	50	3	1	5	2	3	5	20.57	#NULL!	20.57	2	0	6	5	4	6	3	2	1	4	1	2	1	1	1	10	1	1	30	1	1	40	0	1	5	1	1	5	1	1	47	1	5	2
1	0	2	4.14286	2.14286	0	71	3	2.75	5	1	0	1	51.85	#NULL!	51.85	1	1	5	1	2	4	7	4	1	7	6	5	1	3	1	100	0	1	30	1	1	1	0	1	10	0	1	100	0	1	24	0	1	2
0	0	2	4.14286	2.14286	1	65	1	1	7	2	2	4	38.05	#NULL!	38.05	2	0	7	7	7	4	1	4	1	1	1	1	1	1	1	10	1	1	30	1	1	40	0	1	5	1	1	1	0	1	47	1	5	2
0	0	1.42857	3.57143	2.14286	0	47	3	3	7	1	1	2	20.08	#NULL!	20.08	3	1	6	5	5	5	3	3	2	2	5	2	2	3	1	10	1	1	25	0	1	10	0	1	10	0	1	5	1	1	24	0	4	2
1	1	3.28571	5.42857	2.14286	0	41	3	5.75	3	1	1	2	29.18	#NULL!	29.18	1	1	2	1	3	4	7	4	5	7	4	3	7	7	1	10	1	2		0	2		0	1	10	0	1	5	1	2		0	6	4
1	1	3.28571	5.42857	2.14286	0	57	5	4.25	5	2	3	5	25.38	#NULL!	25.38	4	1	3	5	3	5	3	3	6	6	6	6	2	3	1	10	1	1	16	0	1	25	1	1	5	1	1	5	1	1	47	1	6	3
1	1	2	4.14286	2.14286	0	68	3	1	3	1	0	1	39.25	#NULL!	39.25	4	1	2	2	4	6	6	2	1	1	1	2	1	1	1	10	1	2		0	2		0	1	101	0	2		0	1	24	0	5	2
1	1	1.71429	3.85714	2.14286	0	55	3	5.25	6	1	0	1	23.93	#NULL!	23.93	2	0	3	4	4	4	4	4	5	5	5	3	5	6	1	10	1	2		0	2		0	1	10	0	1	500	0	1	24	0	4	2
1	1	2.28571	4.42857	2.14286	1	44	5	4	6	2	3	5	37.8	#NULL!	37.8	4	0	6	3	7	7	5	1	5	7	5	3	3	3	1	10	1	1	25	0	1	25	1	1	5	1	1	5	1	1	47	1	5	2
1	1	1.71429	3.85714	2.14286	1	62	2	3.5	3	1	2	3	22.43	#NULL!	22.43	1	1	3	4	4	6	4	2	4	4	4	4	3	3	1	10	1	1	25	0	1	10	0	1	10	0	1	5	1	1	47	1	2	2
0	1	3.28571	5.42857	2.14286	1	69	5	1.25	1	2	1	3	24.48	#NULL!	24.48	4	1	1	7	1	4	1	4	1	4	1	7	1	2	1	10	1	1	30	1	1	10	0	1	5	1	1	100	0	1	24	0	5	5
0	1	2.28571	4.42857	2.14286	0	71	5	2.75	4	1	0	1	36.12	#NULL!	36.12	2	1	2	5	2	4	3	4	2	2	3	6	4	2	1	10	1	1	25	0	1	20	0	1	10	0	1	100	0	1	24	0	4	1
0	1	1.71429	3.85714	2.14286	1	28	4	2	6	0	0	0	14.38	#NULL!	14.38	3	0	4	2	6	7	6	1	1	1	4	1	1	2	1	5	0	1	25	0	2		0	1	10	0	2		0	1	24	0	3	3
0	1	1.71429	3.85714	2.14286	1	40	5	1	4	2	1	3	32.9	#NULL!	32.9	3	1	3	3	3	6	5	2	1	1	1	4	1	1	1	10	1	1	30	1	1	0,1	0	1	10	0	2		0	1	47	1	4	3
0	1	2	4.14286	2.14286	1	50	5	2	6	1	2	3	43.72	#NULL!	43.72	1	1	5	2	3	5	6	3	2	2	2	5	2	2	1	10	1	1	25	0	1	10	0	1	10	0	1	5	1	1	47	1	4	2
0	1	1.57143	3.71429	2.14286	0	32	3	2.5	5	1	1	2	20.52	#NULL!	20.52	3	0	2	5	4	3	3	5	4	4	4	4	1	1	1	10	1	2		0	2		0	1	10	0	1	5	1	1	24	0	3	4
1	0	2.57143	4.85714	2.28571	0	38	4	2.25	5	0	0	0	14.5	#NULL!	14.5	4	0	4	4	1	4	4	4	1	5	4	1	1	3	2		0	2		0	2		0	2		0	2		0	2		0	4	1
1	0	1.71429	4	2.28571	0	33	4	1	5	1	2	3	28.37	#NULL!	28.37	2	0	5	4	6	6	4	2	1	3	1	3	1	1	1	10	1	2		0	2		0	1	10	0	1	5	1	1	47	1	4	2
1	0	1	3.28571	2.28571	0	31	5	2.75	5	1	3	4	19.75	#NULL!	19.75	2	0	5	1	3	6	7	2	5	4	4	5	1	1	1	10	1	1	25	0	1	33	0	1	5	1	1	5	1	1	47	1	4	1
1	1	3.28571	5.57143	2.28571	0	69	3	6	5	2	2	4	50.42	#NULL!	50.42	2	1	1	6	4	2	2	6	6	6	6	6	6	6	1	10	1	1	30	1	2		0	1	5	1	1	5	1	2		0	5	4
1	1	3	5.28571	2.28571	0	41	3	4.5	5	3	2	5	43.07	#NULL!	43.07	2	1	2	2	1	4	6	4	3	6	2	6	7	6	1	10	1	1	30	1	1	25	1	1	10	0	1	5	1	1	47	1	6	3
1	1	2.71429	5	2.28571	0	41	5	4.75	5	1	3	4	23.1	#NULL!	23.1	1	0	2	5	5	7	3	1	6	6	6	2	4	3	1	10	1	2		0	2		0	1	5	1	1	5	1	1	47	1	4	2
1	1	2.71429	5	2.28571	0	68	3	3.25	3	1	1	2	38.73	#NULL!	38.73	4	0	3	2	4	2	6	6	6	3	5	3	1	1	1	10	1	1	3	0	1	5	0	1	10	0	1	5	1	2		0	4	3
1	1	3	5.28571	2.28571	0	46	4	1.25	3	2	1	3	21.82	#NULL!	21.82	4	0	4	3	4	5	5	3	1	4	2	2	1	1	1	10	1	1	25	0	1	25	1	1	10	0	1	1	0	1	47	1	5	3
1	1	2.28571	4.57143	2.28571	1	60	5	1.75	5	2	2	4	31.77	#NULL!	31.77	3	0	3	2	3	2	6	6	2	5	2	5	2	1	1	10	1	1	30	1	1	10	0	1	5	1	1	100	0	1	47	1	3	2
1	1	1.71429	4	2.28571	0	63	5	1.75	3	1	0	1	60	#NULL!	84.32	1	1	2	6	2	6	2	2	1	2	4	6	1	1	1	10	1	2		0	1	40	0	1	10	0	1	100	0	1	24	0	6	3
1	1	2	4.28571	2.28571	0	46	3	2.75	5	3	2	5	29.67	#NULL!	29.67	1	1	4	5	4	5	3	3	4	5	5	6	1	1	1	10	1	1	30	1	1	25	1	1	10	0	1	5	1	1	47	1	5	2
1	1	2	4.28571	2.28571	1	66	5	1	5	1	1	2	39.92	#NULL!	39.92	2	1	3	5	6	6	3	2	1	1	1	1	1	1	1	10	1	1	60	0	1	10	0	1	10	0	1	5	1	1	0	0	5	2
1	1	1.28571	3.57143	2.28571	1	29	3	1	5	1	0	1	32.88	#NULL!	32.88	2	0	2	2	6	6	6	2	1	5	1	2	1	1	1	10	1	1	25	0	2		0	1	10	0	1	100	0	1	24	0	3	1
1	1	1	3.28571	2.28571	0	48	5	1.75	4	2	1	3	26.58	#NULL!	26.58	3	1	4	2	3	6	6	2	4	4	1	1	1	1	1	10	1	1	25	0	1	25	1	1	10	0	1	100	0	1	47	1	3	1
1	1	1.57143	3.85714	2.28571	1	27	4	1.25	5	3	2	5	35.1	#NULL!	35.1	4	1	3	4	6	7	4	1	1	3	1	5	1	2	1	10	1	1	30	1	1	25	1	1	10	0	1	5	1	1	47	1	4	2
1	1	1.57143	3.85714	2.28571	1	49	3	1.5	5	2	2	4	60	#NULL!	102.3	3	1	4	4	6	6	4	2	2	6	2	6	1	1	1	10	1	1	10	0	1	25	1	1	9	0	1	5	1	1	47	1	4	3
0	1	3.28571	5.57143	2.28571	0	66	4	1.5	8	1	1	2	20	#NULL!	20	1	0	4	5	4	6	3	2	2	2	2	5	1	1	1	10	1	2		0	2		0	1	10	0	1	1	0	1	47	1	6	4
0	1	2.71429	5	2.28571	1	35	5	3	7	3	1	4	19.22	#NULL!	19.22	1	1	3	4	5	4	4	4	3	4	4	5	4	1	1	10	1	1	30	1	1	25	1	1	10	0	1	500	0	1	47	1	6	3
0	1	2	4.28571	2.28571	0	70	5	1	6	1	1	2	34.52	#NULL!	34.52	1	1	5	2	2	5	6	3	1	1	1	5	1	1	1	1	0	2		0	1	25	1	1	10	0	1	5	1	2		0	5	2
1	0	2.14286	4.42857	2.28571	0	65	5	3.25	5	0	0	0	26.67	#NULL!	26.67	4	1	4	2	1	4	6	4	4	4	4	7	3	2	2		0	2		0	2		0	2		0	2		0	2		0	6	2
1	0	2.14286	4.42857	2.28571	1	28	4	1.25	4	3	2	5	16.13	#NULL!	16.13	2	1	2	4	6	4	4	4	2	3	1	2	1	1	1	10	1	1	30	1	1	25	1	1	10	0	1	5	1	1	47	1	5	3
1	1	2.85714	5.14286	2.28571	1	69	3	2.5	4	1	0	1	29.58	#NULL!	29.58	3	1	3	3	5	4	5	4	4	1	4	4	1	1	1	10	1	1	25	0	1	10	0	1	10	0	1	100	0	1	24	0	5	3
1	1	2.85714	5.14286	2.28571	0	46	5	4.5	4	2	1	3	45.23	#NULL!	45.23	3	1	3	3	2	2	5	6	6	6	6	6	3	3	1	10	1	1	30	1	1	10	0	1	10	0	1	1	0	1	47	1	5	2
1	1	1.85714	4.14286	2.28571	0	68	3	4	5	0	0	0	25.7	#NULL!	25.7	1	1	5	3	1	4	5	4	4	6	5	5	4	3	2		0	2		0	2		0	1	10	0	1	20	0	2		0	3	1
1	1	3.14286	5.42857	2.28571	0	28	3	4.25	5	2	2	4	27.02	#NULL!	27.02	1	1	4	4	4	4	4	4	6	6	5	5	4	2	1	10	1	1	25	0	1	25	1	1	5	1	1	100	0	1	47	1	6	2
1	1	1.85714	4.14286	2.28571	0	65	3	5.5	3	1	0	1	58.07	#NULL!	58.07	4	0	2	1	2	2	7	6	6	6	7	6	2	7	1	10	1	2		0	2		0	1	10	0	1	100	0	1	24	0	5	1
1	1	1.85714	4.14286	2.28571	1	54	5	3.25	5	3	2	5	56.15	#NULL!	56.15	3	0	4	2	4	6	6	2	5	5	5	6	2	1	1	10	1	1	30	1	1	25	1	1	10	0	1	5	1	1	47	1	5	2
1	1	2.42857	4.71429	2.28571	1	69	3	6.25	7	0	1	1	43.3	#NULL!	43.3	3	1	5	7	2	4	1	4	7	6	6	6	6	6	1	100	0	1	25	0	1	15	0	1	10	0	1	5	1	1	24	0	5	3
1	1	1.85714	4.14286	2.28571	1	51	4	3	9	3	2	5	29.57	#NULL!	29.57	1	1	6	5	7	7	3	1	4	4	4	5	2	2	1	10	1	1	30	1	1	25	1	1	10	0	1	5	1	1	47	1	5	2
1	1	1.85714	4.14286	2.28571	1	59	5	2.75	4	2	1	3	30.73	#NULL!	30.73	4	1	2	5	4	3	3	5	4	5	3	5	2	2	1	10	1	1	30	1	1	33	0	1	10	0	1	100	0	1	47	1	4	1
1	1	2.14286	4.42857	2.28571	1	75	3	1	4	1	1	2	51.78	#NULL!	51.78	4	0	3	3	4	7	5	1	1	1	1	5	1	1	1	10	1	2		0	1	0	0	1	10	0	1	5	1	1	24	0	5	5
0	1	2.42857	4.71429	2.28571	1	60	2	1	8	0	0	0	26.82	#NULL!	26.82	2	1	7	7	7	7	1	1	1	2	1	1	1	1	2		0	2		0	2		0	1	10	0	2		0	2		0	5	1
0	1	2.14286	4.42857	2.28571	0	72	5	2.25	4	2	0	2	60	#NULL!	61.6	2	0	2	3	3	6	5	2	2	4	2	4	2	3	1	10	1	1	30	1	1	16	0	1	10	0	1	100	0	1	24	0	5	2
0	1	2.42857	4.71429	2.28571	0	46	5	3.5	4	3	3	6	39.52	#NULL!	39.52	3	0	3	6	1	5	2	3	5	5	4	4	2	3	1	10	1	1	30	1	1	25	1	1	5	1	1	5	1	1	47	1	3	2
0	1	2.42857	4.71429	2.28571	1	41	5	2.75	4	3	1	4	22.57	#NULL!	22.57	4	0	3	2	4	3	6	5	3	4	3	5	2	3	1	10	1	1	30	1	1	25	1	1	10	0	1	5	1	2		0	5	3
1	0	2.42857	4.85714	2.42857	1	71	2	3.75	7	2	1	3	39.02	#NULL!	39.02	3	1	5	2	5	6	6	2	4	4	4	2	4	3	1	10	1	2		0	1	25	1	1	5	1	1	100	0	2		0	4	2
1	0	2.14286	4.57143	2.42857	1	30	5	2	3	0	0	0	26.58	#NULL!	26.58	4	1	3	2	3	2	6	6	5	5	1	1	1	1	1	100	0	2		0	1	10	0	1	0	0	1	100	0	2		0	4	3
1	0	1.85714	4.28571	2.42857	1	61	3	2	4	3	3	6	58.55	#NULL!	58.55	4	1	5	3	4	3	5	5	2	6	2	6	2	2	1	10	1	1	30	1	1	25	1	1	5	1	1	5	1	1	47	1	4	3
1	0	1	3.42857	2.42857	0	36	5	1	7	1	1	2	60	#NULL!	185.12	1	1	5	5	5	7	3	1	1	3	1	1	1	1	1	10	1	1	25	0	1	33,3	0	1	5	1	1	100	0	1	24	0	4	1
1	0	2.14286	4.57143	2.42857	0	39	5	3	2	2	3	5	26.15	#NULL!	26.15	4	0	2	4	5	5	4	3	5	6	5	5	1	1	1	10	1	1	25	0	1	25	1	1	5	1	1	5	1	1	47	1	4	3
0	0	2.57143	5	2.42857	1	50	3	2.5	5	2	1	3	22.55	#NULL!	22.55	1	1	5	4	4	5	4	3	4	4	4	4	1	1	1	10	1	1	25	0	1	25	1	1	10	0	1	1	0	1	47	1	5	4
1	1	3.14286	5.57143	2.42857	0	51	5	5.75	6	2	3	5	37.17	#NULL!	37.17	2	1	5	1	3	4	7	4	5	7	7	5	7	4	1	100	0	1	30	1	1	25	1	1	5	1	1	5	1	1	47	1	6	4
1	1	2.42857	4.85714	2.42857	1	35	5	1.25	3	2	2	4	55.12	#NULL!	55.12	3	0	2	2	1	3	6	5	2	2	1	5	1	1	1	10	1	1	30	1	1	40	0	1	10	0	1	5	1	1	47	1	4	3
1	1	3.14286	5.57143	2.42857	0	42	3	2	8	0	0	0	12.15	#NULL!	12.15	2	0	5	2	5	6	6	2	3	4	3	1	1	1	1	100	0	2		0	2		0	1	109	0	2		0	2		0	6	4
1	1	2.42857	4.85714	2.42857	1	67	5	3.75	6	2	3	5	29.75	#NULL!	29.75	1	1	6	2	5	6	6	2	3	4	4	5	5	3	1	10	1	1	30	1	1	10	0	1	5	1	1	5	1	1	47	1	5	2
1	1	2.57143	5	2.42857	1	57	4	3.75	4	3	1	4	58.83	#NULL!	58.83	1	1	2	2	3	3	6	5	7	7	4	6	3	1	1	10	1	1	30	1	1	25	1	1	10	0	1	5	1	1	24	0	6	2
1	1	1.85714	4.28571	2.42857	1	59	5	1	5	3	3	6	60	#NULL!	1164.33	4	1	3	2	6	6	6	2	1	1	1	1	1	1	1	10	1	1	30	1	1	25	1	1	5	1	1	5	1	1	47	1	4	2
1	1	2.57143	5	2.42857	0	55	5	2	7	3	2	5	47.65	#NULL!	47.65	1	1	4	2	2	6	6	2	2	3	3	3	2	1	1	10	1	1	30	1	1	25	1	1	5	1	2		0	1	47	1	5	3
1	1	1.85714	4.28571	2.42857	0	40	3	2	9	0	0	0	60	#NULL!	187.78	2	1	4	7	7	7	1	1	1	5	5	1	1	1	2		0	2		0	2		0	1	10	0	2		0	2		0	4	2
1	1	2.14286	4.57143	2.42857	1	42	3	2.75	4	3	2	5	31.33	#NULL!	31.33	3	1	5	4	4	6	4	2	3	5	3	5	4	1	1	10	1	1	30	1	1	25	1	1	5	1	1	500	0	1	47	1	5	2
1	1	1	3.42857	2.42857	0	39	4	1	6	2	2	4	15.25	#NULL!	15.25	2	0	6	6	5	5	2	3	1	1	1	1	1	1	1	10	1	1	30	1	1	40	0	1	5	1	1	5	1	1	24	0	1	1
1	1	1	3.42857	2.42857	0	27	3	4	3	1	0	1	53.8	#NULL!	53.8	2	0	2	2	4	3	6	5	4	4	5	4	5	2	2		0	1	30	1	2		0	1	10	0	1	100	0	1	24	0	1	1
0	1	2.42857	4.85714	2.42857	0	31	5	1.5	2	0	0	0	12.83	#NULL!	12.83	1	0	1	7	1	6	1	2	2	5	2	5	1	1	2		0	1	25	0	2		0	1	10	0	2		0	1	24	0	5	4
1	0	1.42857	3.85714	2.42857	1	58	3	2.25	3	1	2	3	40.08	#NULL!	40.08	3	0	2	3	4	6	5	2	2	4	2	4	2	3	1	10	1	1	25	0	1	33	0	1	5	1	1	5	1	1	48	0	2	1
1	0	1.42857	3.85714	2.42857	1	27	3	2	3	3	3	6	55.78	#NULL!	55.78	4	0	4	3	3	4	5	4	2	1	4	3	1	1	1	10	1	1	30	1	1	25	1	1	5	1	1	5	1	1	47	1	4	2
1	0	1.57143	4	2.42857	1	29	4	3.25	4	3	3	6	41.67	#NULL!	41.67	3	0	2	1	1	3	7	5	5	5	6	6	1	1	1	10st	1	1	30	1	1	25	1	1	5	1	1	5	1	1	47	1	3	2
1	0	1.28571	3.71429	2.42857	1	46	5	1.5	6	2	2	4	22.52	#NULL!	22.52	2	1	5	2	3	6	6	2	1	4	1	1	1	3	1	100	0	1	30	1	1	25	1	1	10	0	1	5	1	1	47	1	4	2
0	0	2.71429	5.14286	2.42857	1	37	3	3	3	0	1	1	28.63	#NULL!	28.63	1	0	3	6	4	7	2	1	3	5	3	1	4	2	1	100	0	1	5	0	1	30	0	1	10	0	1	5	1	1	24	0	6	4
0	0	1.71429	4.14286	2.42857	1	28	3	3	5	1	1	2	31.17	#NULL!	31.17	2	0	6	4	4	2	4	6	4	5	4	5	3	1	1	10	1	2		0	2		0	1	5	1	1	1	0	1	24	0	4	2
1	1	2.28571	4.71429	2.42857	0	67	5	3	7	2	2	4	39.48	#NULL!	39.48	3	0	5	4	7	3	4	5	1	4	2	2	4	5	1	10	1	2		0	1	25	1	1	5	1	1	5	1	2		0	6	2
1	1	2.28571	4.71429	2.42857	0	53	2	1	4	2	0	2	37.23	#NULL!	37.23	1	1	6	3	5	4	5	4	1	6	1	3	1	1	1	10	1	1	30	1	1	30	0	1	10	0	1	1	0	1	12	0	5	2
1	1	2.71429	5.14286	2.42857	1	49	3	6.25	7	2	2	4	50.8	#NULL!	50.8	2	1	6	4	6	6	4	2	7	7	7	7	6	5	1	10	1	1	60	0	1	25	1	1	10	0	1	5	1	1	47	1	6	1
1	1	3	5.42857	2.42857	0	40	5	2.75	5	2	2	4	50.23	#NULL!	50.23	4	1	4	2	3	3	6	5	4	5	5	4	1	1	1	10	1	1	25	0	1	25	1	1	5	1	1	100	0	1	47	1	5	3
1	1	2.28571	4.71429	2.42857	0	65	3	5.25	4	1	0	1	38.95	#NULL!	38.95	1	1	4	5	5	4	3	4	5	4	5	4	5	6	1	10	1	1	50	0	1	80	0	1	10	0	1	100	0	2		0	3	2
1	1	2.28571	4.71429	2.42857	1	70	5	2	4	2	3	5	53.73	#NULL!	53.73	1	0	2	2	3	7	6	1	4	5	1	5	1	2	1	10	1	1	30	1	1	10	0	1	5	1	1	5	1	1	47	1	5	3
1	1	1.71429	4.14286	2.42857	1	54	5	2.5	8	1	3	4	48.83	#NULL!	48.83	4	1	6	2	2	7	6	1	2	6	5	3	1	2	1	10	1	2		0	1	50	0	1	5	1	1	5	1	1	47	1	4	2
1	1	1.42857	3.85714	2.42857	0	49	3	2.5	3	1	2	3	20.63	#NULL!	20.63	2	0	1	6	5	4	2	4	1	4	1	3	2	6	1	10	1	2		0	1	10	0	1	10	0	1	5	1	1	47	1	3	2
1	1	2.28571	4.71429	2.42857	0	52	5	2.75	7	3	1	4	37.6	#NULL!	37.6	2	0	6	7	7	6	1	2	1	5	1	1	5	4	1	10	1	1	30	1	1	25	1	1	5	1	1	100	0	1	24	0	6	4
1	1	1.71429	4.14286	2.42857	1	49	2	2	6	2	3	5	22.65	#NULL!	22.65	3	1	4	3	6	3	5	5	2	4	4	4	1	1	1	10	1	1	30	1	1	10	0	1	5	1	1	5	1	1	47	1	4	1
1	1	1.71429	4.14286	2.42857	0	68	5	3.25	3	0	0	0	33.42	#NULL!	33.42	2	0	2	4	2	5	4	3	4	4	4	4	3	2	2		0	2		0	2		0	2		0	2		0	2		0	4	1
1	1	1.57143	4	2.42857	1	63	3	2	4	3	3	6	22.78	#NULL!	22.78	3	1	2	2	5	7	6	1	5	4	1	4	1	1	1	10	1	1	30	1	1	25	1	1	5	1	1	5	1	1	47	1	3	4
1	1	1.71429	4.14286	2.42857	1	74	5	5.25	4	1	0	1	48.42	#NULL!	48.42	2	1	3	5	4	6	3	2	4	6	4	4	6	7	1	10	1	2		0	1	20	0	1	10	0	1	100	0	2		0	5	2
0	1	2.71429	5.14286	2.42857	0	59	5	3.25	6	0	1	1	42.75	#NULL!	42.75	1	0	2	3	7	4	5	4	1	5	6	4	4	2	2		0	1	25	0	2		0	1	10	0	1	5	1	2		0	5	2
0	1	2.71429	5.14286	2.42857	1	75	2	2.75	6	0	0	0	30.68	#NULL!	30.68	4	0	5	4	5	6	4	2	4	4	3	5	1	3	2		0	2		0	1	?	0	1	10	0	1	100	0	1	24	0	5	2
0	1	2	4.42857	2.42857	1	68	5	3.25	5	2	2	4	22.62	#NULL!	22.62	4	1	4	6	2	3	2	5	3	4	5	6	2	3	1	10	1	1	30	1	1	60	0	2		0	1	5	1	1	47	1	5	2
0	1	2	4.42857	2.42857	1	60	3	1.25	6	2	2	4	43.52	#NULL!	43.52	4	1	2	2	6	7	6	1	2	6	1	6	1	1	1	10	1	1	25	0	1	25	1	1	5	1	1	5	1	1	0	0	5	2
0	1	1.71429	4.14286	2.42857	1	65	5	5	7	1	2	3	16.47	#NULL!	16.47	1	1	2	6	7	5	2	3	4	5	6	3	5	5	1	10	1	2		0	1	20	0	1	10	0	1	5	1	1	47	1	5	2
0	1	1.57143	4	2.42857	1	62	3	2	6	2	2	4	20.7	#NULL!	20.7	1	0	4	4	5	5	4	3	2	4	1	6	2	3	1	10	1	1	30	1	1	10	0	1	5	1	1	5	1	1	12	0	4	1
0	1	1.71429	4.14286	2.42857	1	39	3	3	4	2	2	4	25.87	#NULL!	25.87	1	1	2	4	5	5	4	3	4	4	4	4	2	2	1	100	0	1	30	1	1	25	1	1	10	0	1	5	1	1	47	1	6	2
1	0	2.28571	4.85714	2.57143	0	39	5	3.75	5	1	0	1	22.55	#NULL!	22.55	2	0	3	4	4	4	4	4	4	5	4	5	4	3	1	10	1	2		0	2		0	1	10	0	2		0	2		0	5	2
1	0	1.71429	4.28571	2.57143	0	39	3	3.5	1	0	0	0	10	#NULL!	10	4	0	1	4	2	4	4	4	5	5	5	3	2	2	2		0	2		0	2		0	1	10	0	2		0	2		0	5	2
1	0	2	4.57143	2.57143	1	39	5	2.5	7	3	3	6	20.05	#NULL!	20.05	2	0	7	6	6	7	2	1	4	4	4	5	1	1	1	10	1	1	30	1	1	25	1	1	5	1	1	5	1	1	47	1	5	2
1	0	2.28571	4.85714	2.57143	1	55	4	5.25	6	3	1	4	30.83	#NULL!	30.83	2	1	5	2	4	6	6	2	5	5	5	4	5	6	1	10	1	1	30	1	1	25	1	1	10	0	1	5	1	1	24	0	4	2
0	0	1.42857	4	2.57143	0	49	5	5.5	5	0	1	1	20.27	#NULL!	20.27	3	1	4	4	1	7	4	1	4	7	4	4	7	7	1	100	0	1	50	0	1	20	0	1	10	0	1	5	1	1	24	0	5	1
1	1	2.28571	4.85714	2.57143	1	48	4	3	5	3	3	6	29.37	#NULL!	29.37	4	1	1	1	1	7	7	1	7	7	2	7	2	1	1	10	1	1	30	1	1	25	1	1	5	1	1	5	1	1	47	1	4	3
1	1	3.28571	5.85714	2.57143	0	42	3	2.25	5	2	0	2	20.77	#NULL!	20.77	3	1	2	2	4	4	6	4	2	5	4	1	1	2	1	10	1	1	25	0	1	25	1	1	10	0	1	1	0	2		0	6	3
1	1	1.42857	4	2.57143	0	42	4	4	3	1	1	2	39.7	#NULL!	39.7	2	1	2	5	3	6	3	2	5	5	5	5	4	2	1	10	1	1	60	0	2		0	1	10	0	1	5	1	2		0	4	1
1	1	1.71429	4.28571	2.57143	1	52	5	3	6	2	2	4	23.1	#NULL!	23.1	3	1	4	5	5	4	3	4	3	3	4	3	3	2	1	10	1	1	25	0	1	25	1	1	5	1	1	5	1	1	24	0	3	2
0	1	2.71429	5.28571	2.57143	0	47	5	3.5	2	0	0	0	26.3	#NULL!	26.3	1	1	5	3	5	3	5	5	5	5	5	5	2	2	1	100	0	1	25	0	1	10	0	1	10	0	2		0	2		0	5	2
0	1	2.28571	4.85714	2.57143	1	73	4	1	5	2	2	4	18.93	#NULL!	18.93	3	1	5	2	1	5	6	3	1	3	1	1	1	1	1	10	1	1	30	1	1	60	0	1	10	0	1	5	1	1	47	1	5	2
0	1	1.28571	3.85714	2.57143	0	38	5	5.5	4	2	2	4	15.18	#NULL!	15.18	1	1	4	1	5	6	7	2	6	6	6	4	5	5	1	10	1	1	30	1	1	30	0	1	10	0	1	5	1	1	47	1	3	2
0	1	1.42857	4	2.57143	1	37	5	2	6	3	2	5	34.6	#NULL!	34.6	2	1	7	3	4	7	5	1	4	4	2	3	1	1	1	10	1	1	30	1	1	25	1	1	10	0	1	5	1	1	47	1	4	2
0	1	1.42857	4	2.57143	0	60	3	4.5	3	2	3	5	60	#NULL!	78.45	1	1	4	4	3	4	4	4	5	5	5	4	5	3	1	10	1	1	30	1	1	33	0	1	5	1	1	5	1	1	47	1	5	1
1	0	2.42857	5	2.57143	0	49	3	1	7	3	3	6	19.2	#NULL!	19.2	3	1	6	6	5	6	2	2	1	2	1	2	1	1	1	10	1	1	30	1	1	25	1	1	5	1	1	5	1	1	47	1	5	3
1	0	1.85714	4.42857	2.57143	1	39	5	1.5	4	3	2	5	12.63	#NULL!	12.63	4	1	5	3	6	6	5	2	2	3	2	5	1	1	1	10	1	1	30	1	1	25	1	1	5	1	1	100	0	1	47	1	3	3
1	0	2.42857	5	2.57143	1	39	5	1	7	1	1	2	60	#NULL!	119.72	4	1	6	1	5	5	7	3	1	7	1	4	1	1	1	10	1	1	25	0	1	30	0	1	10	0	1	5	1	2		0	5	4
0	0	2.14286	4.71429	2.57143	1	72	4	1.75	5	2	1	3	32.05	#NULL!	32.05	1	1	3	4	6	7	4	1	2	2	2	2	1	2	1	10	1	1	30	1	1	40	0	1	10	0	1	100	0	1	47	1	5	2
0	0	2.85714	5.42857	2.57143	0	60	5	4	4	2	1	3	49.28	#NULL!	49.28	4	0	5	3	4	4	5	4	6	6	6	6	2	2	1	10	1	2		0	1	25	1	2		0	1	1	0	1	47	1	5	3
1	1	2.57143	5.14286	2.57143	0	64	3	2.5	6	1	0	1	27.25	#NULL!	27.25	2	0	4	7	7	7	1	1	4	4	4	4	1	1	1	10	1	1	5	0	1	33	0	1	10	0	1	100	0	2		0	5	2
1	1	2.42857	5	2.57143	1	48	4	2.25	7	2	2	4	26.8	#NULL!	26.8	2	1	3	5	5	6	3	2	2	5	3	2	2	2	1	10	1	1	30	1	1	10	0	1	10	0	1	5	1	1	47	1	5	2
1	1	2.42857	5	2.57143	1	41	3	2.5	4	2	1	3	24.02	#NULL!	24.02	2	0	1	6	5	6	2	2	3	5	4	5	1	2	1	10	1	1	30	1	1	10	0	1	10	0	1	5	1	1	36	0	5	2
1	1	1.85714	4.42857	2.57143	1	74	3	4	6	1	2	3	56.18	#NULL!	56.18	2	1	6	2	5	6	6	2	5	5	5	5	3	3	1	10	1	1	25	0	1	33	0	1	10	0	1	5	1	1	47	1	5	1
1	1	2.42857	5	2.57143	1	60	4	1.75	6	3	3	6	25.92	#NULL!	25.92	2	1	6	1	1	6	7	2	4	7	1	6	1	1	1	10	1	1	30	1	1	25	1	1	5	1	1	5	1	1	47	1	6	2
1	1	2.42857	5	2.57143	1	62	5	1.75	5	1	2	3	30.92	#NULL!	30.92	3	1	1	6	2	7	2	1	1	1	1	5	2	3	1	10	1	1	60	0	1	10	0	1	10	0	1	5	1	1	47	1	5	4
1	1	2.14286	4.71429	2.57143	1	74	3	4.25	7	1	0	1	26.1	#NULL!	26.1	4	1	5	1	5	5	7	3	5	4	5	5	4	3	1	10	1	1	10	0	1	20	0	1	10	0	1	20	0	1	24	0	5	2
1	1	2.42857	5	2.57143	1	53	5	1.5	9	3	2	5	33.78	#NULL!	33.78	1	1	7	6	7	7	2	1	3	6	1	3	1	1	1	10	1	1	30	1	1	25	1	1	105	0	1	5	1	1	47	1	6	3
1	1	2.57143	5.14286	2.57143	0	44	5	2.75	3	1	1	2	30.37	#NULL!	30.37	2	1	2	6	3	5	2	3	4	1	4	6	1	2	1	100	0	1	30	1	2		0	1	10	0	1	5	1	1	24	0	3	4
1	1	2.14286	4.71429	2.57143	1	50	3	2.25	5	2	3	5	25.52	#NULL!	25.52	4	1	6	6	7	7	2	1	4	4	1	1	1	3	1	10	1	1	30	1	1	40	0	1	5	1	1	5	1	1	47	1	5	4
1	1	1.14286	3.71429	2.57143	0	33	5	3.75	4	1	1	2	23.4	#NULL!	23.4	3	0	2	6	2	6	2	2	4	4	4	2	4	3	1	10	1	1	25	0	2		0	2		0	1	100	0	1	47	1	5	1
1	1	1.85714	4.42857	2.57143	1	46	3	3.5	7	3	3	6	37.68	#NULL!	37.68	2	1	6	5	6	7	3	1	5	6	5	5	2	2	1	10	1	1	30	1	1	25	1	1	5	1	1	5	1	1	47	1	6	5
1	1	1	3.57143	2.57143	1	39	5	1.75	6	2	3	5	46.13	#NULL!	46.13	1	1	2	4	5	6	4	2	4	4	1	4	1	1	1	10	1	1	25	0	1	25	1	1	5	1	1	5	1	1	47	1	4	1
0	1	2.42857	5	2.57143	1	72	4	3.5	5	1	0	1	29.18	#NULL!	29.18	3	1	4	2	4	3	6	5	4	4	4	4	4	2	1	10	1	1	25	0	2		0	1	10	0	1	100	0	1	24	0	6	1
0	1	1.85714	4.42857	2.57143	1	41	3	2	4	2	2	4	26.58	#NULL!	26.58	1	0	5	5	3	2	3	6	2	3	3	5	2	1	1	10	1	1	25	0	1	25	1	1	5	1	2		0	1	47	1	3	2
1	1	1.57143	4.14286	2.57143	1	52	3	1	6	3	2	5	55.65	#NULL!	55.65	4	1	5	5	5	3	3	5	1	1	1	1	1	1	1	10	1	1	30	1	1	25	1	1	5	1	1	100	0	1	47	1	5	2
1	0	2.14286	4.85714	2.71429	1	64	5	1.5	6	2	0	2	25.77	#NULL!	25.77	2	1	2	2	2	6	6	2	2	2	2	4	1	1	1	10	1	1	30	1	1	10	0	1	10	0	1	100	0	1	7	0	4	2
0	0	1.85714	4.57143	2.71429	1	74	5	1	8	1	0	1	20.18	#NULL!	20.18	3	1	6	7	7	7	1	1	1	1	1	1	1	1	1	10	1	1	5	0	2		0	1	10	0	1	100	0	1	24	0	5	2
1	1	3.14286	5.85714	2.71429	0	39	5	6.25	6	2	0	2	29.72	#NULL!	29.72	2	0	1	5	1	7	3	1	5	6	7	5	7	6	1	10	1	1	30	1	1	10	0	1	10	0	1	100	0	1	24	0	6	2
1	1	2.57143	5.28571	2.71429	1	55	5	6.75	9	1	0	1	14.57	#NULL!	14.57	4	0	7	7	7	7	1	1	7	7	7	2	7	6	1	10	1	2		0	1	60	0	1	10	0	1	1	0	1	24	0	6	2
1	1	2.57143	5.28571	2.71429	0	59	5	3.25	7	1	0	1	60	#NULL!	139.17	1	0	5	6	5	5	2	3	4	4	4	1	2	3	1	10	1	2		0	2		0	2		0	1	100	0	2		0	5	3
1	1	2.85714	5.57143	2.71429	1	39	5	4	5	1	2	3	38.47	#NULL!	38.47	1	1	2	4	3	3	4	5	5	7	7	5	1	3	1	10	1	1	25	0	1	10	0	1	5	1	1	500	0	1	47	1	6	3
1	1	2.57143	5.28571	2.71429	0	63	5	1	1	0	0	0	24.78	#NULL!	24.78	3	0	1	1	1	4	7	4	1	1	1	1	1	1	2		0	2		0	2		0	1	10	0	2		0	1	24	0	5	2
1	1	1.85714	4.57143	2.71429	0	57	5	1.25	9	0	1	1	32.65	#NULL!	32.65	1	0	7	6	6	6	2	2	1	1	1	1	1	2	1	100	0	1	37	0	1	38	0	1	10	0	1	5	1	2		0	4	2
1	1	2.14286	4.85714	2.71429	1	59	5	1.5	4	2	2	4	32.25	#NULL!	32.25	3	1	4	2	4	6	6	2	1	1	2	6	1	2	1	10	1	1	30	1	1	33	0	1	10	0	1	5	1	1	47	1	4	2
1	1	2.14286	4.85714	2.71429	0	66	5	2.5	3	1	3	4	25.75	#NULL!	25.75	2	0	1	2	1	6	6	2	4	7	4	6	1	1	1	10	1	1	25	0	1	10	0	1	5	1	1	5	1	1	47	1	5	2
1	1	1.85714	4.57143	2.71429	0	61	2	5.75	5	0	1	1	27.38	#NULL!	27.38	1	1	4	5	2	2	3	6	6	4	4	5	7	6	1	1	0	1	25	0	1	50	0	1	9	0	1	5	1	1	12	0	5	3
1	1	2.14286	4.85714	2.71429	1	48	3	1	4	1	1	2	23.38	#NULL!	23.38	4	0	4	4	7	7	4	1	1	1	1	4	1	1	1	10	1	2		0	2		0	1	10	0	1	5	1	1	2	0	5	2
0	0	1.42857	4.14286	2.71429	0	72	5	3	6	0	0	0	49.58	#NULL!	49.58	4	0	4	6	5	4	2	4	3	5	4	4	4	1	1	100	0	2		0	2		0	1	100	0	1	20	0	2		0	6	2
0	0	2	4.71429	2.71429	1	52	2	2.25	5	1	1	2	17.17	#NULL!	17.17	2	0	6	6	7	5	2	3	5	1	2	6	1	1	1	10	1	2		0	2		0	1	5	1	1	1	0	2		0	4	2
0	0	1.28571	4	2.71429	0	41	5	1.75	3	2	0	2	14.6	#NULL!	14.6	3	1	1	1	7	7	7	1	4	6	1	3	1	1	1	10	1	1	30	1	2		0	1	10	0	2		0	2		0	1	1
1	1	3.28571	6	2.71429	0	53	5	2.75	5	0	0	0	47.35	#NULL!	47.35	1	0	4	2	2	7	6	1	4	1	5	6	1	1	1	100	0	2		0	1	50	0	1	10	0	1	100	0	1	24	0	6	1
1	1	2.71429	5.42857	2.71429	0	33	5	1.25	2	3	3	6	24.15	#NULL!	24.15	3	1	2	2	2	3	6	5	1	1	1	2	1	2	1	10	1	1	30	1	1	25	1	1	5	1	1	5	1	1	47	1	6	2
1	1	3	5.71429	2.71429	0	52	3	2	6	2	3	5	27.82	#NULL!	27.82	1	0	3	4	5	6	4	2	1	5	2	3	2	3	1	10	1	1	30	1	1	90	0	1	5	1	1	5	1	1	47	1	5	4
1	1	2.28571	5	2.71429	1	72	5	1	7	1	3	4	60	#NULL!	73.85	4	0	2	5	1	3	3	5	1	7	1	2	1	1	1	10	1	1	25	0	1	10	0	1	5	1	1	5	1	1	47	1	5	4
1	1	2	4.71429	2.71429	0	75	4	5	6	2	1	3	50.3	#NULL!	50.3	4	0	2	1	2	4	7	4	6	6	6	6	5	3	1	10	1	1	30	1	1	4	0	1	10	0	1	5	1	1	24	0	4	1
1	1	2.28571	5	2.71429	0	58	3	4	3	0	0	0	48.18	#NULL!	48.18	2	1	2	6	6	2	2	6	4	3	4	3	5	3	1	100	0	1	33	0	1	40	0	1	10	0	1	20	0	1	24	0	4	2
1	1	2.28571	5	2.71429	0	50	3	2.75	2	3	0	3	60	#NULL!	64.5	4	1	3	5	3	6	3	2	4	4	4	4	1	2	1	10	1	1	30	1	1	25	1	1	10	0	1	100	0	2		0	2	2
1	1	2	4.71429	2.71429	0	53	3	2.25	3	3	1	4	59.88	#NULL!	59.88	4	1	2	2	2	2	6	6	4	2	2	2	1	2	1	10	1	1	30	1	1	25	1	1	10	0	1	5	1	1	24	0	4	3
1	1	2.28571	5	2.71429	0	52	4	1.25	3	2	0	2	26.55	#NULL!	26.55	3	0	1	6	2	2	2	6	1	7	1	6	1	2	1	10	1	1	25	0	1	25	1	1	10	0	1	100	0	1	24	0	5	2
1	1	2	4.71429	2.71429	0	64	3	4.75	3	2	0	2	30.33	#NULL!	30.33	1	0	2	5	2	6	3	2	6	6	4	5	5	4	1	10	1	1	30	1	1	40	0	1	10	0	1	100	0	2		0	5	3
1	1	1.42857	4.14286	2.71429	0	57	5	3.5	6	1	2	3	22.8	#NULL!	22.8	4	0	5	3	3	3	5	5	4	4	4	4	2	4	1	10	1	2		0	2		0	1	10	0	1	5	1	1	47	1	4	1
1	1	2	4.71429	2.71429	1	52	5	3.25	5	3	3	6	23.9	#NULL!	23.9	1	1	6	1	2	6	7	2	6	6	5	6	1	1	1	10	1	1	30	1	1	25	1	1	5	1	1	5	1	1	47	1	5	2
1	1	1.57143	4.28571	2.71429	1	68	3	4	4	2	0	2	27.13	#NULL!	27.13	2	1	1	6	2	1	2	7	5	6	5	5	3	3	1	10	1	1	30	1	1	75	0	1	10	0	1	1	0	2		0	3	1
1	1	1.71429	4.42857	2.71429	1	38	5	2.25	4	3	3	6	19.83	#NULL!	19.83	1	0	3	2	3	6	6	2	4	1	2	5	1	2	1	10	1	1	30	1	1	25	1	1	5	1	1	5	1	1	47	1	6	2
1	1	1.42857	4.14286	2.71429	0	42	5	1.5	5	1	0	1	60	#NULL!	173.27	3	0	2	2	4	6	6	2	3	2	1	6	1	1	1	1%	0	1	30	1	1	30	0	1	10	0	1	100	0	1	24	0	5	1
1	1	2.28571	5	2.71429	1	63	3	3	7	3	2	5	24.57	#NULL!	24.57	3	0	6	2	4	7	6	1	6	2	3	5	1	2	1	10	1	1	30	1	1	25	1	1	10	0	1	5	1	1	47	1	4	2
1	1	1.57143	4.28571	2.71429	1	68	3	5.75	7	2	2	4	29.7	#NULL!	29.7	2	0	3	6	5	5	2	3	5	4	5	3	6	7	1	10	1	2		0	1	25	1	1	5	1	1	5	1	2		0	5	1
1	1	1	3.71429	2.71429	0	41	5	1.75	3	3	3	6	34.63	#NULL!	34.63	1	1	2	2	2	5	6	3	4	7	1	5	1	1	1	10	1	1	30	1	1	25	1	1	5	1	1	5	1	1	47	1	5	1
1	1	2	4.71429	2.71429	0	55	5	4.5	6	1	0	1	36.43	#NULL!	36.43	4	1	5	3	2	3	5	5	7	6	7	6	2	2	1	10	1	1	15	0	2		0	1	11	0	1	100	0	1	24	0	3	2
1	1	1	3.71429	2.71429	0	41	5	2.25	4	2	2	4	39.9	#NULL!	39.9	3	0	2	2	2	3	6	5	6	4	1	6	1	1	1	10	1	2		0	1	25	1	1	5	1	1	5	1	2		0	4	1
1	1	3	5.71429	2.71429	0	68	5	1	6	2	3	5	39.67	#NULL!	39.67	3	1	3	6	6	5	2	3	1	1	1	1	1	1	1	10	1	1	25	0	1	25	1	1	5	1	1	5	1	1	47	1	6	4
1	1	1.42857	4.14286	2.71429	0	40	5	5.5	5	3	3	6	35.27	#NULL!	35.27	1	1	6	2	1	3	6	5	6	3	4	4	7	5	1	10	1	1	30	1	1	25	1	1	5	1	1	5	1	1	47	1	3	4
1	1	1.57143	4.28571	2.71429	1	51	5	5.75	7	3	3	6	26.5	#NULL!	26.5	3	1	3	5	3	7	3	1	6	4	4	6	7	6	1	10	1	1	30	1	1	25	1	1	5	1	1	5	1	1	47	1	4	3
1	1	1	3.71429	2.71429	1	62	5	2.25	3	2	3	5	18.93	#NULL!	18.93	2	1	1	5	2	4	3	4	4	5	1	5	2	2	1	10	1	1	25	0	1	25	1	1	5	1	1	5	1	1	47	1	3	1
1	1	1	3.71429	2.71429	1	38	3	2	3	0	0	0	17.57	#NULL!	17.57	4	0	1	2	7	4	6	4	2	2	2	4	2	2	2		0	2		0	2		0	1	10	0	2		0	2		0	4	1
1	1	1	3.71429	2.71429	1	47	5	1	6	3	3	6	60	#NULL!	106.23	4	1	6	3	3	1	5	7	1	1	1	6	1	1	1	10	1	1	30	1	1	25	1	1	5	1	1	5	1	1	47	1	5	1
1	1	1	3.71429	2.71429	1	53	5	1	7	3	3	6	54.4	#NULL!	54.4	1	1	6	6	6	7	2	1	1	1	1	1	1	1	1	10	1	1	30	1	1	25	1	1	5	1	1	5	1	1	47	1	5	1
1	1	1	3.71429	2.71429	1	47	4	1.5	7	3	3	6	29.17	#NULL!	29.17	1	1	6	3	6	6	5	2	2	2	2	3	1	1	1	10	1	1	30	1	1	25	1	1	5	1	1	5	1	1	47	1	5	1
0	1	2	4.71429	2.71429	0	24	3	2.75	5	0	0	0	10.9	#NULL!	10.9	1	0	5	4	4	3	4	5	4	4	4	5	1	2	2		0	2		0	2		0	2		0	2		0	2		0	4	3
0	1	1.57143	4.28571	2.71429	1	64	3	1.5	7	3	3	6	29.65	#NULL!	29.65	4	0	6	6	6	7	2	1	1	1	1	1	1	3	1	10	1	1	30	1	1	25	1	1	5	1	1	5	1	1	47	1	4	2
0	1	1.42857	4.14286	2.71429	1	74	4	1.25	7	1	1	2	45.65	#NULL!	45.65	1	1	7	1	6	7	7	1	2	4	1	5	1	1	1	10	1	2		0	1	30	0	1	5	1	1	100	0	1	24	0	5	1
1	1	2.42857	5.14286	2.71429	0	73	5	4.25	4	1	2	3	60	#NULL!	85	1	1	5	1	5	7	7	1	5	4	5	6	4	3	1	10	1	1	25	0	1	30	0	1	10	0	1	5	1	1	47	1	5	2
1	1	2.42857	5.14286	2.71429	0	31	5	5.5	5	1	3	4	49.13	#NULL!	49.13	1	1	2	5	2	4	3	4	5	5	4	2	7	6	1	100	0	2		0	1	25	1	1	5	1	1	5	1	1	47	1	4	2
1	1	2.42857	5.14286	2.71429	0	47	5	4	7	2	0	2	47.98	#NULL!	47.98	2	0	6	2	1	6	6	2	4	5	4	4	5	3	1	10	1	1	30	1	1	10	0	1	10	0	1	1	0	1	24	0	5	4
1	1	2.42857	5.14286	2.71429	0	59	5	5.75	8	3	1	4	46	#NULL!	46	2	1	6	2	2	7	6	1	7	7	7	5	2	7	1	10	1	1	30	1	1	25	1	1	10	0	1	100	0	1	47	1	5	3
1	0	2.71429	5.57143	2.85714	0	72	5	1	3	0	0	0	20.3	#NULL!	20.3	3	0	2	3	1	2	5	6	1	4	1	6	1	1	2		0	2		0	2		0	2		0	2		0	2		0	5	2
1	0	1.42857	4.28571	2.85714	0	50	5	2.75	4	0	0	0	23.58	#NULL!	23.58	4	0	3	2	3	4	6	4	2	6	5	4	2	2	1	100	0	1	25	0	1	30	0	2		0	2		0	1	24	0	4	1
0	0	1.71429	4.57143	2.85714	1	67	3	1	9	1	0	1	24.22	#NULL!	24.22	4	0	6	7	7	6	1	2	1	1	1	1	1	1	1	10	1	2		0	2		0	1	10	0	1	100	0	1	24	0	5	3
0	0	1.71429	4.57143	2.85714	1	42	5	1	7	2	3	5	16.55	#NULL!	16.55	1	1	5	3	3	4	5	4	1	1	1	1	1	1	1	10	1	1	30	1	1	10	0	1	5	1	1	5	1	1	47	1	4	4
1	1	2.71429	5.57143	2.85714	1	37	3	1.75	4	1	1	2	60	#NULL!	68.45	3	0	2	2	2	4	6	4	4	4	1	1	1	1	1	10	1	2		0	2		0	1	10	0	1	100	0	1	47	1	4	3
1	1	1.71429	4.57143	2.85714	1	64	2	3.75	5	0	0	0	31	#NULL!	31	2	0	4	4	4	6	4	2	7	4	4	6	1	3	1	1	0	2		0	1	10	0	1	10	0	1	1	0	1	24	0	6	1
1	1	1.71429	4.57143	2.85714	1	63	5	3.75	6	2	3	5	46.93	#NULL!	46.93	2	1	5	3	3	5	5	3	4	4	5	4	3	3	1	10	1	1	30	1	1	33	0	1	5	1	1	5	1	1	47	1	5	2
1	1	3	5.85714	2.85714	0	62	5	1	4	3	3	6	60	#NULL!	148.23	2	1	2	4	3	5	4	3	1	6	1	4	1	1	1	10	1	1	30	1	1	25	1	1	5	1	1	5	1	1	47	1	6	3
1	1	2	4.85714	2.85714	1	63	3	2.75	6	2	3	5	60	#NULL!	79.57	2	0	6	3	3	2	5	6	4	4	4	2	2	1	1	10	1	1	66	0	1	25	1	1	5	1	1	5	1	1	47	1	6	2
1	1	2	4.85714	2.85714	1	35	5	3.25	7	1	1	2	60	#NULL!	147.83	3	1	7	6	6	5	2	3	4	4	5	5	3	1	1	10	1	1	25	0	1	40	0	1	10	0	1	5	1	1	24	0	5	1
1	1	1.42857	4.28571	2.85714	1	37	5	1	4	2	0	2	47.37	#NULL!	47.37	3	1	2	3	3	3	5	5	1	1	1	1	1	1	1	10	1	2		0	1	25	1	2		0	2		0	2		0	4	1
1	1	1.42857	4.28571	2.85714	0	42	5	3	4	2	1	3	27.4	#NULL!	27.4	1	0	1	4	2	4	4	4	4	4	4	4	2	2	1	10	1	1	30	1	1	40	0	1	10	0	1	5	1	1	24	0	5	2
0	1	2	4.85714	2.85714	0	68	3	5	4	2	3	5	28.92	#NULL!	28.92	2	1	4	2	1	6	6	2	6	6	5	5	6	3	1	10	1	1	30	1	1	40	0	1	5	1	1	5	1	1	47	1	5	3
0	1	1.71429	4.57143	2.85714	1	69	4	2	4	1	1	2	43.73	#NULL!	43.73	3	1	2	5	4	3	3	5	1	5	2	3	2	3	1	10	1	1	25	0	1	40	0	1	5	1	1	100	0	1	24	0	6	1
0	1	2	4.85714	2.85714	1	49	3	1	5	2	1	3	21.15	#NULL!	21.15	3	0	4	4	4	5	4	3	1	1	1	1	1	1	1	10	1	1	30	1	1	10	0	1	10	0	1	5	1	1	0	0	5	3
0	1	1.42857	4.28571	2.85714	1	66	5	3.5	6	1	0	1	29.55	#NULL!	29.55	1	1	6	2	4	7	6	1	3	4	3	4	5	3	1	10	1	2		0	1	20	0	1	9	0	2		0	2		0	4	2
0	1	1.71429	4.57143	2.85714	1	43	3	1.5	8	3	3	6	27.58	#NULL!	27.58	4	1	6	5	3	6	3	2	2	2	1	4	1	2	1	10	1	1	30	1	1	25	1	1	5	1	1	5	1	1	47	1	5	2
0	0	2.85714	5.71429	2.85714	1	20	3	1	8	1	1	2	38.8	#NULL!	38.8	4	1	7	1	5	7	7	1	1	5	1	2	1	1	1	10	1	1	25	0	1	50	0	1	105	0	1	5	1	1	12	0	6	4
1	1	2.42857	5.28571	2.85714	0	25	5	3	3	3	3	6	20.65	#NULL!	20.65	4	0	1	3	3	4	5	4	4	4	4	4	1	3	1	10	1	1	30	1	1	25	1	1	5	1	1	5	1	1	47	1	5	2
1	1	2.57143	5.42857	2.85714	0	40	3	3.75	7	0	1	1	20.92	#NULL!	20.92	2	1	4	5	5	6	3	2	4	5	5	5	3	3	1	1	0	2		0	2		0	1	10	0	1	5	1	1	48	0	6	4
1	1	2.85714	5.71429	2.85714	0	19	4	5	1	0	0	0	18.37	#NULL!	18.37	3	1	1	4	4	1	4	7	7	7	7	7	5	1	2		0	2		0	2		0	1	10	0	1	100	0	2		0	6	6
1	1	2.57143	5.42857	2.85714	0	42	5	2.5	5	3	2	5	35.52	#NULL!	35.52	2	1	5	3	5	6	5	2	4	5	2	6	2	2	1	10	1	1	30	1	1	25	1	1	10	0	1	5	1	1	47	1	5	3
1	1	2.14286	5	2.85714	0	36	5	3.25	6	1	0	1	15.73	#NULL!	15.73	3	0	4	4	2	4	4	4	5	7	3	4	4	1	1	10	1	2		0	2		0	1	10	0	1	100	0	2		0	5	3
1	1	2.42857	5.28571	2.85714	1	69	3	3.75	6	3	3	6	60	#NULL!	141.2	2	1	7	2	1	4	6	4	5	7	5	6	2	3	1	10	1	1	30	1	1	25	1	1	5	1	1	5	1	1	47	1	6	3
1	1	1.14286	4	2.85714	0	62	4	1	8	3	1	4	36.2	#NULL!	36.2	2	1	7	1	5	7	7	1	1	1	1	1	1	1	1	10	1	1	30	1	1	25	1	1	10	0	1	100	0	1	47	1	5	1
1	1	1	3.85714	2.85714	0	57	5	4.25	3	3	2	5	32.7	#NULL!	32.7	2	1	1	2	1	6	6	2	5	7	5	7	1	6	1	10	1	1	30	1	1	25	1	1	10	0	1	5	1	1	47	1	2	1
1	1	1	3.85714	2.85714	0	49	5	2.25	4	2	2	4	38.02	#NULL!	38.02	4	1	4	1	5	7	7	1	5	5	1	5	1	2	1	10	1	1	30	1	1	10	0	1	10	0	1	5	1	1	47	1	4	1
1	1	1	3.85714	2.85714	0	64	5	3.5	2	0	1	1	24.82	#NULL!	24.82	4	1	1	2	2	2	6	6	5	6	5	7	1	3	1	100	0	1	25	0	1	30%	0	1	5	1	1	100	0	1	14	0	1	1
1	1	1	3.85714	2.85714	0	71	4	1.75	4	1	1	2	34.08	#NULL!	34.08	3	0	2	5	1	7	3	1	1	1	1	1	2	3	1	10	1	1	25	0	2		0	1	5	1	1	500	0	2		0	5	1
1	1	1.85714	4.71429	2.85714	1	45	5	3.75	3	1	2	3	29.65	#NULL!	29.65	4	1	2	3	2	6	5	2	5	5	5	5	3	2	1	100	0	1	30	1	1	80	0	1	105	0	1	5	1	1	47	1	5	2
1	1	1.14286	4	2.85714	1	39	3	1	3	1	3	4	27.28	#NULL!	27.28	1	1	1	2	1	6	6	2	1	5	1	1	1	1	1	10	1	1	25	0	2		0	1	5	1	1	5	1	1	47	1	4	1
1	1	2.57143	5.42857	2.85714	1	61	5	1.25	4	3	2	5	39.68	#NULL!	39.68	2	1	2	2	3	6	6	2	1	5	1	5	1	2	1	10	1	1	30	1	1	25	1	1	10	0	1	5	1	1	47	1	6	5
0	1	2.57143	5.42857	2.85714	1	61	4	3.75	5	1	1	2	23.83	#NULL!	23.83	1	0	3	2	4	6	6	2	5	7	1	7	5	4	1	10	1	1	25	0	1	60	0	1	10	0	1	100	0	1	47	1	5	3
0	1	1.85714	4.71429	2.85714	1	26	3	1	6	2	1	3	12.62	#NULL!	12.62	1	1	5	4	6	4	4	4	1	1	1	2	1	1	1	0.1	0	1	30	1	1	25	1	1	10	0	1	100	0	1	47	1	3	2
0	1	2.14286	5	2.85714	1	68	5	2	6	1	3	4	9.5	#NULL!	9.5	4	1	4	4	5	3	4	5	2	2	2	3	1	3	1	19	0	1	30	1	1	10	0	1	5	1	1	5	1	1	47	1	5	2
0	1	1	3.85714	2.85714	1	47	5	2.75	5	3	1	4	60	#NULL!	93.75	3	0	2	5	7	7	3	1	4	4	4	4	1	2	1	10	1	1	30	1	1	25	1	1	10	0	2		0	1	47	1	4	1
1	0	1.57143	4.42857	2.85714	1	41	5	1	3	3	3	6	60	#NULL!	128.07	1	1	2	1	4	6	7	2	1	6	1	4	1	1	1	10	1	1	30	1	1	25	1	1	5	1	1	5	1	1	47	1	4	3
1	0	1.28571	4.14286	2.85714	1	35	3	1	3	2	3	5	31.42	#NULL!	31.42	1	1	2	2	4	4	6	4	1	3	1	1	1	1	1	10	1	1	30	1	1	20	0	1	5	1	1	5	1	1	47	1	4	1
1	0	1.57143	4.42857	2.85714	1	46	5	1	7	2	2	4	55.25	#NULL!	55.25	2	0	6	5	7	7	3	1	1	1	1	1	1	1	1	10	1	2		0	1	25	1	1	10	0	1	5	1	1	47	1	5	1
1	1	2.28571	5.14286	2.85714	0	51	3	3	5	1	0	1	46.3	#NULL!	46.3	2	0	3	2	2	6	6	2	4	5	4	4	1	3	1	10	1	2		0	1	33.3	0	1	10	0	1	2.5	0	2		0	5	3
1	1	1.57143	4.42857	2.85714	0	44	5	1.75	4	3	1	4	19.87	#NULL!	19.87	1	1	2	4	3	6	4	2	1	7	4	2	1	1	1	10	1	1	30	1	1	25	1	1	10	0	1	5	1	1	24	0	3	1
1	1	1.28571	4.14286	2.85714	1	74	5	4	5	2	3	5	41.92	#NULL!	41.92	2	1	5	2	4	6	6	2	4	4	4	5	5	3	1	10	1	1	30	1	1	10	0	1	5	1	1	5	1	1	47	1	4	1
1	1	1.57143	4.42857	2.85714	1	38	5	1.25	7	2	2	4	40.38	#NULL!	40.38	3	1	4	3	5	5	5	3	1	2	1	3	1	2	1	10	1	1	30	1	1	40	0	1	10	0	1	5	1	1	47	1	5	1
1	1	1.28571	4.14286	2.85714	0	73	5	1.75	7	3	3	6	24.52	#NULL!	24.52	4	1	6	3	4	3	5	5	2	4	2	2	1	2	1	10	1	1	30	1	1	25	1	1	5	1	1	5	1	1	47	1	4	1
1	1	1.28571	4.14286	2.85714	0	53	5	3.25	7	1	0	1	23.12	#NULL!	23.12	1	1	6	2	6	7	6	1	1	5	4	1	1	7	1	10	1	2		0	2		0	1	10	0	2		0	2		0	3	2
1	1	1.28571	4.14286	2.85714	0	47	5	4.25	5	3	2	5	38.08	#NULL!	38.08	3	0	3	5	4	7	3	1	7	7	7	6	1	2	1	10	1	1	30	1	1	25	1	1	5	1	1	5	1	2		0	4	1
1	1	1.28571	4.14286	2.85714	1	42	5	5.5	7	3	3	6	25.87	#NULL!	25.87	2	1	5	7	5	6	1	2	4	2	4	6	7	7	1	10	1	1	30	1	1	25	1	1	5	1	1	5	1	1	47	1	5	2
0	1	1.57143	4.42857	2.85714	0	41	4	1.75	7	3	2	5	23.15	#NULL!	23.15	2	0	6	2	2	4	6	4	2	2	2	2	2	1	1	10	1	1	30	1	1	25	1	1	5	1	1	5	1	1	24	0	4	2
1	0	1.85714	4.85714	3	0	41	5	1	4	3	3	6	13.97	#NULL!	13.97	1	1	5	5	6	3	3	5	1	1	1	1	1	1	1	10	1	1	30	1	1	25	1	1	5	1	1	5	1	1	47	1	3	3
1	1	1.85714	4.85714	3	1	33	5	1.5	2	3	3	6	38.95	#NULL!	38.95	1	0	1	7	7	7	1	1	1	2	1	1	1	3	1	10	1	1	30	1	1	25	1	1	5	1	1	5	1	1	47	1	5	1
1	1	1.85714	4.85714	3	0	51	5	2.75	4	3	2	5	60	#NULL!	68.83	2	1	3	2	4	6	6	2	4	5	3	4	2	2	1	10	1	1	30	1	1	25	1	1	10	0	1	5	1	1	47	1	4	2
0	1	2.57143	5.57143	3	1	75	5	1	6	2	1	3	20.47	#NULL!	20.47	4	1	5	1	3	5	7	3	1	1	1	1	1	1	1	10	1	1	25	0	1	25	1	1	10	0	1	100	0	1	47	1	6	3
1	0	2	5	3	1	35	4	1.5	7	2	2	4	23.28	#NULL!	23.28	1	1	4	2	5	5	6	3	1	6	2	2	1	2	1	10	1	1	30	1	1	10	0	1	10	0	1	5	1	1	47	1	5	3
0	0	1.42857	4.42857	3	0	47	5	2.75	2	0	1	1	17.6	#NULL!	17.6	4	1	3	5	2	6	3	2	3	5	3	6	2	3	1	Ingen	0	1	27	0	1	60	0	1	90	0	1	5	1	1	25	0	1	4
1	1	1.71429	4.71429	3	1	61	5	1.5	7	2	3	5	47.87	#NULL!	47.87	2	1	6	5	7	6	3	2	2	1	2	1	1	1	1	10	1	1	30	1	1	8	0	1	5	1	1	5	1	1	47	1	5	1
1	1	1.28571	4.28571	3	0	55	3	1	7	0	0	0	26.03	#NULL!	26.03	4	0	4	5	5	6	3	2	1	1	1	4	1	1	2		0	2		0	2		0	1	10	0	2		0	2		0	3	1
1	1	1	4	3	0	56	3	1	3	1	2	3	18.88	#NULL!	18.88	4	0	4	4	4	4	4	4	1	1	1	2	1	1	1	10	1	1	25	0	2		0	1	10	0	1	5	1	1	47	1	6	1
1	1	1	4	3	1	56	5	1	4	1	3	4	60	#NULL!	109.37	3	1	2	2	5	6	6	2	1	6	1	6	1	1	1	10	1	1	25	0	1	20	0	1	5	1	1	5	1	1	47	1	3	1
0	1	2.28571	5.28571	3	0	63	3	2.25	4	2	1	3	54.72	#NULL!	54.72	1	0	3	2	5	5	6	3	3	2	3	3	1	2	1	10	1	1	30	1	2		0	2		0	1	100	0	1	47	1	6	1
0	1	2	5	3	0	74	3	2.5	7	1	0	1	54.37	#NULL!	54.37	3	1	3	6	6	6	2	2	2	2	2	2	2	4	1	10	1	2		0	2		0	1	10	0	1	20	0	1	24	0	4	1
0	1	1.71429	4.71429	3	0	45	3	3	7	2	2	4	21.3	#NULL!	21.3	4	0	6	6	6	2	2	6	4	6	5	2	1	2	1	10	1	1	30	1	1	40	0	1	10	0	1	5	1	1	47	1	5	1
0	1	1.57143	4.57143	3	1	65	4	3	6	2	3	5	53.85	#NULL!	53.85	1	1	6	2	2	3	6	5	4	6	4	6	1	3	1	10	1	1	30	1	1	10	0	1	5	1	1	5	1	1	47	1	5	1
0	1	1	4	3	1	48	5	1.5	7	2	2	4	38.08	#NULL!	38.08	2	0	4	4	2	6	4	2	1	2	1	2	2	2	1	10	1	1	30	1	1	10	0	1	5	1	1	100	0	1	47	1	4	1
1	0	2.14286	5.14286	3	0	44	5	3	3	3	3	6	22.98	#NULL!	22.98	4	1	2	3	3	5	5	3	4	4	4	5	2	2	1	10	1	1	30	1	1	25	1	1	5	1	1	5	1	1	47	1	5	4
1	1	2.14286	5.14286	3	0	37	5	1	4	1	2	3	48.33	#NULL!	48.33	3	0	4	3	2	3	5	5	1	1	1	3	1	1	1	10	1	2		0	1	10	0	1	10	0	1	5	1	1	47	1	4	3
1	1	1.14286	4.14286	3	1	46	5	1	7	3	3	6	60	#NULL!	64.97	4	1	6	2	3	7	6	1	1	1	1	1	1	1	1	10	1	1	30	1	1	25	1	1	5	1	1	5	1	1	47	1	5	1
0	1	2.14286	5.14286	3	1	46	5	1	6	3	3	6	39.38	#NULL!	39.38	3	1	5	4	5	7	4	1	1	5	1	5	1	1	1	10	1	1	30	1	1	25	1	1	5	1	1	5	1	1	47	1	4	3
1	1	1.71429	4.85714	3.14286	0	39	5	3.75	1	0	0	0	44.37	#NULL!	44.37	3	1	7	7	7	1	1	7	2	7	7	5	3	3	2		0	2		0	2		0	2		0	2		0	2		0	1	1
1	1	2.71429	5.85714	3.14286	0	57	3	1	4	0	1	1	15.38	#NULL!	15.38	4	0	5	6	2	5	2	3	1	1	1	5	1	1	1	1	0	1	5	0	1	15	0	1	10	0	1	5	1	1	12	0	6	3
0	1	1.42857	4.57143	3.14286	0	74	4	4	7	3	3	6	39.03	#NULL!	39.03	4	1	5	4	4	6	4	2	4	4	4	5	5	3	1	10	1	1	30	1	1	25	1	1	5	1	1	5	1	1	47	1	4	2
0	1	1.42857	4.57143	3.14286	0	49	3	3.25	6	2	2	4	34.5	#NULL!	34.5	3	0	6	4	5	4	4	4	5	5	5	4	1	2	1	10	1	1	30	1	2		0	2		0	1	5	1	1	47	1	5	2
0	1	1.42857	4.57143	3.14286	1	53	5	1	7	2	3	5	26.43	#NULL!	26.43	3	1	5	6	6	7	2	1	1	1	1	5	1	1	1	10	1	1	30	1	1	10	0	1	5	1	1	5	1	1	47	1	4	2
1	1	2.85714	6	3.14286	1	72	3	2.75	3	0	0	0	32.22	#NULL!	32.22	2	1	6	4	2	6	4	2	7	4	1	1	1	2	2		0	2		0	2		0	2		0	2		0	2		0	6	3
1	1	2.57143	5.71429	3.14286	0	63	5	3.25	3	0	1	1	16.55	#NULL!	16.55	2	1	2	2	2	6	6	2	4	2	6	6	2	1	1	100	0	1	35	0	1	10	0	1	10	0	1	5	1	1	24	0	6	4
1	1	2.57143	5.71429	3.14286	1	63	3	3.5	5	2	2	4	21.42	#NULL!	21.42	4	1	3	3	3	4	5	4	5	6	5	5	1	3	1	10	1	1	33	0	1	25	1	1	10	0	1	5	1	1	47	1	6	2
0	1	2.42857	5.57143	3.14286	0	44	3	1	6	3	2	5	26.95	#NULL!	26.95	1	1	7	1	1	4	7	4	1	7	1	4	1	1	1	10	1	1	30	1	1	25	1	1	10	0	1	5	1	1	47	1	5	2
1	1	2	5.14286	3.14286	0	69	5	1	2	0	0	0	45.52	#NULL!	45.52	1	1	1	1	1	4	7	4	1	4	1	4	1	1	1	100	0	1	5	0	2		0	1	10	0	1	100	0	1	24	0	6	5
1	1	2	5.14286	3.14286	0	46	3	4.5	7	1	0	1	25.85	#NULL!	25.85	4	0	5	2	4	2	6	6	5	4	5	5	5	3	1	10	1	2		0	2		0	1	10	0	1	100	0	1	24	0	6	2
1	1	1.57143	4.71429	3.14286	1	61	3	5	5	1	2	3	32.6	#NULL!	32.6	3	1	3	3	4	4	5	4	5	4	4	5	6	5	1	10	1	1	25	0	1	10	0	1	10	0	1	5	1	1	47	1	5	2
1	1	1	4.14286	3.14286	1	43	5	1.5	7	1	1	2	16.58	#NULL!	16.58	1	0	7	1	1	6	7	2	1	1	1	1	1	3	1	10	1	2		0	2		0	1	10	0	2		0	1	47	1	3	1
0	1	1.57143	4.71429	3.14286	1	75	5	3	6	2	0	2	35.72	#NULL!	35.72	1	1	6	3	3	3	5	5	1	6	2	5	6	3	1	10	1	1	30	1	1	40	0	1	10	0	1	100	0	1	24	0	4	2
0	1	1.57143	4.71429	3.14286	0	63	5	1.75	3	0	0	0	19	#NULL!	19	4	1	2	2	2	5	6	3	1	4	2	4	1	3	2		0	2		0	2		0	2		0	2		0	2		0	5	2
1	0	1.71429	5	3.28571	1	46	5	2.25	7	3	3	6	60	#NULL!	261.18	3	1	6	2	6	7	6	1	4	5	3	2	1	1	1	10	1	1	30	1	1	25	1	1	5	1	1	5	1	1	47	1	6	1
1	0	1.42857	4.71429	3.28571	1	68	3	3.5	6	3	2	5	28.08	#NULL!	28.08	2	1	5	5	5	6	3	2	3	2	3	3	2	6	1	10	1	1	30	1	1	25	1	1	10	0	1	5	1	1	47	1	4	1
1	1	1.57143	4.85714	3.28571	0	62	3	3.5	6	2	2	4	33.43	#NULL!	33.43	4	1	4	3	3	6	5	2	5	5	5	5	2	2	1	10	1	1	30	1	1	40	0	1	5	1	1	100	0	1	47	1	6	1
1	1	2	5.28571	3.28571	1	48	3	2	7	1	1	2	52.45	#NULL!	52.45	1	1	3	5	2	6	3	2	1	4	5	1	1	1	1	10	1	2		0	1	40	0	1	10	0	1	100	0	1	47	1	6	1
1	1	2	5.28571	3.28571	1	45	5	1.5	2	2	2	4	29.32	#NULL!	29.32	4	0	3	3	2	5	5	3	2	5	1	6	1	2	1	100	0	1	30	1	1	25%	1	2		0	1	5	1	1	47	1	6	2
1	1	2	5.28571	3.28571	0	58	3	2.75	6	3	1	4	56.25	#NULL!	56.25	2	1	3	2	1	5	6	3	4	5	4	6	1	2	1	10	1	1	30	1	1	25	1	1	5	1	1	100	0	1	12	0	6	2
1	1	2.28571	5.57143	3.28571	0	38	4	2.5	3	3	3	6	60	#NULL!	186.02	1	1	2	2	2	3	6	5	4	4	4	5	1	1	1	10	1	1	30	1	1	25	1	1	5	1	1	5	1	1	47	1	6	4
1	1	2	5.28571	3.28571	0	37	5	1	3	2	2	4	26.62	#NULL!	26.62	3	1	2	1	1	2	7	6	1	7	1	1	1	1	1	10	1	1	30	1	1	10	0	1	10	0	1	5	1	1	47	1	5	2
1	1	1.57143	4.85714	3.28571	0	62	5	5	4	1	2	3	60	#NULL!	70.9	2	1	1	4	1	4	4	4	4	4	4	6	5	7	1	10	1	2		0	1	50	0	1	5	1	1	5	1	2		0	4	2
1	1	1.71429	5	3.28571	0	62	5	1.25	3	3	3	6	34.02	#NULL!	34.02	2	1	2	2	1	7	6	1	2	5	1	3	1	1	1	10	1	1	30	1	1	25	1	1	5	1	1	5	1	1	47	1	5	2
1	1	1.28571	4.57143	3.28571	0	54	3	3.25	5	2	0	2	58.82	#NULL!	58.82	2	0	7	6	5	4	2	4	1	5	4	1	5	3	1	10	1	1	30	1	1	10	0	1	10	0	1	1	0	1	24	0	5	1
1	1	2	5.28571	3.28571	0	45	5	3.25	4	2	2	4	40.33	#NULL!	40.33	3	1	4	4	3	6	4	2	4	4	4	6	1	4	1	10	1	1	25	0	1	25	1	1	5	1	1	1	0	1	47	1	5	4
1	1	1	4.28571	3.28571	0	58	5	6	5	2	2	4	44.28	#NULL!	44.28	1	0	3	5	2	3	3	5	5	4	5	5	7	7	1	10	1	1	30	1	1	10	0	1	5	1	1	1	0	1	47	1	5	1
1	1	1	4.28571	3.28571	0	36	3	4	5	0	0	0	17.82	#NULL!	17.82	1	1	2	5	7	4	3	4	4	4	5	2	3	4	2		0	2		0	2		0	1	10	0	1	100	0	2		0	5	1
1	1	1	4.28571	3.28571	0	37	5	1	2	2	2	4	24.93	#NULL!	24.93	1	1	3	2	3	6	6	2	1	1	1	1	1	1	1	100	0	1	30	1	1	25	1	1	5	1	1	5	1	1	24	0	4	1
1	1	1.28571	4.57143	3.28571	1	68	5	4	6	2	2	4	39.22	#NULL!	39.22	1	1	6	7	6	6	1	2	4	4	4	3	5	3	1	10	1	1	30	1	1	10	0	1	10	0	1	5	1	1	47	1	4	2
1	1	1.42857	4.71429	3.28571	1	59	5	2.5	4	1	0	1	34.58	#NULL!	34.58	3	0	2	5	5	5	3	3	1	2	1	7	5	3	1	10	1	2		0	1	40	0	1	11	0	2		0	2		0	5	1
0	1	1.28571	4.57143	3.28571	0	39	5	4.5	5	1	0	1	18.1	#NULL!	18.1	3	0	3	1	2	5	7	3	6	6	6	5	4	2	1	100	0	1	25	0	1	25	1	1	10	0	1	100	0	1	24	0	6	1
1	0	1.85714	5.14286	3.28571	0	42	3	3.25	8	0	0	0	35.03	#NULL!	35.03	4	0	2	3	6	7	5	1	2	7	7	3	2	2	2		0	2		0	2		0	2		0	1	100	0	2		0	4	2
1	0	1.14286	4.42857	3.28571	0	46	3	1	4	0	0	0	20.52	#NULL!	20.52	3	0	2	2	4	3	6	5	1	1	1	1	1	1	2		0	1	3	0	2		0	2		0	2		0	1	24	0	5	1
1	0	1.14286	4.42857	3.28571	0	58	3	2.5	5	0	0	0	47.17	#NULL!	47.17	2	1	2	4	3	4	4	4	4	4	4	4	1	1	2		0	1	25	0	2		0	1	10	0	2		0	1	24	0	4	1
1	1	2.14286	5.42857	3.28571	0	71	5	3.25	6	0	3	3	31.82	#NULL!	31.82	1	1	4	3	4	4	5	4	3	4	4	4	4	2	2		0	2		0	2		0	1	5	1	1	5	1	1	47	1	4	2
1	1	1.85714	5.14286	3.28571	0	55	5	4.75	7	2	2	4	29.5	#NULL!	29.5	3	1	6	6	1	4	2	4	4	6	4	4	5	6	1	10	1	1	25	0	1	25	1	1	10	0	1	5	1	1	47	1	5	2
1	1	2.42857	5.71429	3.28571	1	70	4	3.25	4	1	0	1	23.97	#NULL!	23.97	4	0	2	2	2	4	6	4	5	6	5	5	2	1	1	10	1	1	25	0	1	10	0	1	10	0	1	100	0	1	är redan täckt	0	6	3
0	1	1.85714	5.14286	3.28571	1	46	5	2.5	5	1	0	1	39.38	#NULL!	39.38	4	1	4	3	5	3	5	5	3	4	3	3	2	2	1	10	1	1	25	0	1	10	0	1	10	0	1	100	0	1	24	0	5	3
1	1	1.42857	4.85714	3.42857	0	23	5	1.25	5	1	0	1	17.07	#NULL!	17.07	4	0	4	5	4	3	3	5	1	2	1	1	1	2	1	10	1	1	15	0	1	30%	0	1	10	0	1	1	0	1	24	0	3	1
1	1	1.42857	4.85714	3.42857	0	43	4	4.25	4	0	0	0	23.05	#NULL!	23.05	3	0	2	2	4	6	6	2	4	7	5	6	5	3	1	1	0	1	10	0	2		0	1	11	0	2		0	2		0	5	1
1	1	1.85714	5.28571	3.42857	0	69	5	3	6	2	2	4	35.45	#NULL!	35.45	2	0	5	4	4	4	4	4	3	5	3	4	3	3	1	10	1	1	30	1	2		0	1	5	1	2		0	1	47	1	6	2
1	1	1.85714	5.28571	3.42857	0	68	2	1.5	3	1	0	1	32	#NULL!	32	4	1	3	2	3	5	6	3	1	1	1	5	2	2	1	10	1	2		0	2		0	1	10	0	2		0	2		0	5	1
1	1	1.85714	5.28571	3.42857	0	49	5	2.5	5	0	0	0	20.58	#NULL!	20.58	1	0	5	3	4	6	5	2	4	4	4	4	1	1	2		0	1	Hälften	0	2		0	1	10	0	2		0	1	24	0	4	2
1	1	1.14286	4.57143	3.42857	0	66	5	2.75	5	0	0	0	49.78	#NULL!	49.78	2	0	4	3	3	4	5	4	1	5	4	1	3	3	2		0	2		0	2		0	1	10	0	2		0	2		0	4	1
1	1	1.85714	5.28571	3.42857	0	48	3	1	2	2	2	4	26.88	#NULL!	26.88	3	1	1	1	1	1	7	7	1	1	1	6	1	1	1	10	1	1	25	0	1	25	1	1	5	1	1	100	0	1	47	1	6	3
1	1	1.14286	4.57143	3.42857	1	53	5	2	2	3	3	6	29.3	#NULL!	29.3	3	1	1	1	1	7	7	1	5	5	1	5	1	1	1	10	1	1	30	1	1	25	1	1	5	1	1	5	1	1	47	1	4	2
0	1	1.14286	4.57143	3.42857	0	57	5	2.5	5	2	1	3	28.6	#NULL!	28.6	1	1	7	3	2	5	5	3	2	6	4	5	2	2	1	10	1	1	30	1	1	10	0	1	10	0	1	5	1	1	24	0	5	2
1	0	1.71429	5.14286	3.42857	1	59	3	1	3	1	3	4	36.32	#NULL!	36.32	1	0	2	6	3	6	2	2	1	4	1	1	1	1	1	10	1	1	25	0	1	10	0	1	5	1	1	5	1	1	47	1	5	1
1	1	1.57143	5	3.42857	1	69	5	2.75	6	1	3	4	27.23	#NULL!	27.23	1	1	5	6	6	7	2	1	6	6	2	3	1	2	1	10	1	1	25	0	1	10	0	1	5	1	1	5	1	1	47	1	5	2
1	1	1.57143	5	3.42857	0	56	5	1.75	5	1	1	2	28.27	#NULL!	28.27	2	1	4	5	3	5	3	3	3	3	1	5	2	1	1	10	1	1	25	0	1	40	0	1	10	0	1	100	0	1	47	1	6	1
1	1	1	4.42857	3.42857	0	45	5	1	1	2	2	4	25.43	#NULL!	25.43	1	0	1	1	3	6	7	2	1	6	1	2	1	1	1	10	1	1	30	1	1	40	0	1	10	0	1	5	1	1	47	1	3	1
1	1	1	4.42857	3.42857	0	61	5	5.5	5	0	0	0	37.7	#NULL!	37.7	4	0	2	4	2	6	4	2	4	5	5	5	7	6	2		0	2		0	2		0	1	10	0	2		0	2		0	4	1
1	1	1.57143	5	3.42857	1	63	5	1.5	4	2	3	5	60	#NULL!	80.02	3	1	1	2	1	7	6	1	2	7	2	5	1	1	1	10	1	1	30	1	1	10	0	1	5	1	1	5	1	1	47	1	5	4
0	1	1.71429	5.14286	3.42857	1	54	5	1.25	7	2	3	5	60	#NULL!	91.07	1	1	6	7	6	3	1	5	2	6	1	1	1	1	1	10	1	1	30	1	1	60	0	1	5	1	1	5	1	1	47	1	5	2
1	0	2.28571	5.85714	3.57143	1	30	5	3.5	6	3	3	6	41.3	#NULL!	41.3	3	1	3	3	5	4	5	4	4	5	4	3	3	3	1	10	1	1	30	1	1	25	1	1	5	1	1	5	1	1	47	1	6	2
1	0	1.71429	5.28571	3.57143	0	64	5	1.25	5	2	2	4	45.02	#NULL!	45.02	1	1	3	5	2	5	3	3	1	1	1	1	1	2	1	10	1	1	25	0	1	25	1	1	5	1	1	5	1	1	24	0	6	2
1	1	1.42857	5	3.57143	0	69	2	2.25	2	2	0	2	58.57	#NULL!	58.57	2	0	1	4	2	2	4	6	2	4	3	5	2	2	1	10	1	1	30	1	1	40	0	1	10	0	1	100	0	1	24	0	3	1
1	1	2	5.57143	3.57143	1	58	3	2.5	5	1	0	1	60	#NULL!	71.82	2	1	4	5	6	7	3	1	4	4	4	4	1	1	1	10	1	1	10	0	2		0	2		0	1	100	0	1	24	0	5	2
1	1	2.28571	5.85714	3.57143	0	58	5	4.25	6	2	2	4	60	#NULL!	67.48	4	1	5	2	5	4	6	4	4	4	5	4	5	3	2		0	1	30	1	1	25	1	1	5	1	1	5	1	2		0	6	4
1	1	2	5.57143	3.57143	0	66	3	3	5	1	0	1	46.97	#NULL!	46.97	3	0	3	2	1	4	6	4	5	5	4	6	1	2	1	1	0	2		0	1	25	1	1	10	0	1	100	0	1	24	0	6	1
1	1	1	4.57143	3.57143	0	48	3	2.75	3	1	0	1	60	#NULL!	62.63	3	0	2	4	4	5	4	3	4	5	4	5	1	2	1	10	1	2		0	1	60	0	1	10	0	1	1	0	1	24	0	4	1
1	1	1	4.57143	3.57143	1	40	3	1.75	9	1	3	4	60	#NULL!	136.18	4	0	7	2	4	7	6	1	4	1	1	1	1	1	1	10	1	1	25	0	1	20	0	1	5	1	1	5	1	1	47	1	1	1
1	0	1.85714	5.42857	3.57143	1	68	5	1	6	2	0	2	41.95	#NULL!	41.95	3	0	3	2	3	6	6	2	1	4	1	3	1	1	1	10	1	1	30	1	2		0	1	10	0	1	100	0	1	24	0	5	2
1	1	2.42857	6	3.57143	0	72	3	4.25	6	0	0	0	31.48	#NULL!	31.48	4	0	4	5	5	3	3	5	5	6	4	2	5	3	1	1%	0	2		0	1	1,6%	0	1	10	0	1	100	0	2		0	6	4
1	1	1.14286	4.71429	3.57143	0	54	4	3.25	3	3	2	5	52.77	#NULL!	52.77	2	0	1	1	2	6	7	2	1	6	5	5	4	3	1	10	1	1	30	1	1	25	1	1	5	1	1	100	0	1	47	1	4	1
1	1	1.14286	4.71429	3.57143	0	55	3	1	4	2	3	5	31.28	#NULL!	31.28	3	0	3	2	4	4	6	4	1	4	1	1	1	1	1	10	1	1	30	1	1	10	0	1	5	1	1	5	1	1	47	1	4	2
1	1	1.14286	4.71429	3.57143	1	45	4	5.5	7	2	3	5	47.62	#NULL!	47.62	1	1	4	2	2	7	6	1	6	6	6	6	6	4	1	10 stycken	1	1	25 gånger	0	1	25	1	1	5	1	1	5	1	1	47	1	5	2
0	0	1.57143	5.14286	3.57143	0	53	5	1.75	7	1	0	1	20.3	#NULL!	20.3	3	0	7	1	4	7	7	1	3	5	2	5	1	1	1	10	1	1	25	0	1	20	0	1	10	0	1	1	0	1	24	0	4	1
0	0	1.57143	5.14286	3.57143	1	54	3	1.25	5	1	2	3	19.87	#NULL!	19.87	4	1	6	5	5	3	3	5	1	4	1	5	2	1	1	10	1	1	33	0	1	10	0	1	10	0	1	5	1	1	47	1	5	1
1	1	1.57143	5.14286	3.57143	0	62	5	4.75	7	2	3	5	25.35	#NULL!	25.35	1	1	4	6	5	6	2	2	4	5	4	6	5	6	1	10	1	1	30	1	1	10	0	1	5	1	1	5	1	1	47	1	5	3
0	0	1.14286	4.85714	3.71429	0	53	4	1.75	6	2	1	3	24.45	#NULL!	24.45	4	0	5	5	5	5	3	3	1	4	3	5	1	2	1	10	1	1	25	0	1	25	1	1	10	0	1	5	1	2		0	2	1
1	0	1	4.71429	3.71429	0	72	5	4.75	5	3	2	5	58.63	#NULL!	58.63	3	0	2	5	5	4	3	4	3	6	3	3	7	6	1	10	1	1	30	1	1	25	1	1	10	0	1	5	1	1	47	1	5	1
0	0	2	5.71429	3.71429	1	57	2	1.75	5	3	0	3	60	#NULL!	67.15	4	1	4	4	4	2	4	6	4	7	1	5	1	1	1	10	1	1	30	1	1	25	1	1	10	0	1	100	0	1	24	0	6	1
1	1	1.42857	5.14286	3.71429	0	43	5	3	3	1	1	2	37.05	#NULL!	37.05	1	1	2	4	3	2	4	6	4	5	4	5	2	2	1	10	1	1	25	0	2		0	1	10	0	1	5	1	2		0	5	1
1	1	1	4.71429	3.71429	0	68	5	2.75	3	2	3	5	33.12	#NULL!	33.12	3	1	2	2	2	6	6	2	5	7	4	6	1	1	1	10	1	1	30	1	2		0	1	5	1	1	5	1	1	47	1	4	1
1	1	1	4.71429	3.71429	0	52	3	1.25	3	0	1	1	40.62	#NULL!	40.62	2	0	3	4	4	5	4	3	1	4	2	5	1	1	1	1	0	2		0	2		0	1	10	0	2		0	1	47	1	3	1
1	1	1.57143	5.28571	3.71429	1	46	5	1.75	4	3	3	6	26.97	#NULL!	26.97	1	1	3	1	2	6	7	2	3	5	1	2	1	2	1	10	1	1	30	1	1	25	1	1	5	1	1	5	1	1	47	1	6	2
1	1	1	4.71429	3.71429	1	43	5	1.5	6	3	2	5	48.18	#NULL!	48.18	4	1	4	3	3	7	5	1	1	1	1	1	2	2	1	10	1	1	30	1	1	25	1	1	5	1	2		0	1	47	1	4	1
1	1	1	4.71429	3.71429	1	44	3	1	3	0	0	0	34.62	#NULL!	34.62	1	0	2	2	2	3	6	5	1	2	1	4	1	1	1	100	0	1	3	0	2		0	1	10	0	1	1	0	2		0	4	1
1	1	1	4.71429	3.71429	1	48	3	2.5	7	1	0	1	48.9	#NULL!	48.9	1	0	2	2	2	6	6	2	4	4	4	6	1	1	1	10	1	2		0	1	60	0	1	10	0	2		0	2		0	5	1
1	1	1	4.71429	3.71429	1	40	5	1	2	1	2	3	16.92	#NULL!	16.92	1	1	1	2	5	6	6	2	1	2	1	5	1	1	1	10	1	1	25	0	2		0	1	5	1	2		0	1	47	1	5	1
1	1	1.28571	5	3.71429	1	65	5	1.5	7	3	3	6	57.13	#NULL!	57.13	4	1	6	2	4	6	6	2	1	1	1	2	1	3	1	10	1	1	3 av 5, d v s 30	1	1	25	1	1	5	1	1	5	1	1	47	1	4	3
0	1	1.42857	5.14286	3.71429	1	52	5	1.5	6	1	3	4	22.5	#NULL!	22.5	1	1	4	6	6	6	2	2	1	4	1	2	1	3	1	10	1	2		0	1	30	0	1	5	1	1	5	1	1	47	1	4	1
0	1	1.28571	5	3.71429	1	73	5	3.5	6	3	1	4	39.27	#NULL!	39.27	1	1	3	3	5	5	5	3	4	5	3	2	4	3	1	10	1	1	30	1	1	25	1	1	10	0	1	5	1	1	24	0	5	2
1	0	1.71429	5.57143	3.85714	1	39	4	6.5	3	3	3	6	60	#NULL!	64.62	4	1	2	3	1	6	5	2	7	7	7	7	6	6	1	10	1	1	30	1	1	25	1	1	5	1	1	5	1	1	47	1	6	2
1	1	1	4.85714	3.85714	1	50	4	1.25	4	2	3	5	25.35	#NULL!	25.35	2	1	3	2	5	7	6	1	1	1	1	2	1	2	1	10	1	1	60	0	1	25	1	1	5	1	1	5	1	1	47	1	5	1
0	1	1	4.85714	3.85714	1	60	5	3.5	4	2	2	4	46.38	#NULL!	46.38	4	1	4	2	4	6	6	2	5	5	5	6	2	2	1	10	1	1	25	0	1	25	1	1	10	0	1	5	1	1	47	1	6	1
1	0	2.14286	6	3.85714	0	27	3	3	5	3	3	6	44.65	#NULL!	44.65	4	0	6	6	6	7	2	1	1	3	2	1	5	4	1	10	1	1	30	1	1	25	1	1	5	1	1	5	1	1	47	1	6	2
1	1	1.14286	5	3.85714	0	54	3	1.5	7	1	0	1	23.08	#NULL!	23.08	4	0	4	2	3	5	6	3	3	4	1	3	1	1	1	10	1	2		0	1	9	0	1	10	0	1	250	0	2		0	4	1
1	1	1.85714	5.71429	3.85714	1	59	5	3.25	3	3	3	6	60	#NULL!	77.37	4	1	2	2	2	4	6	4	5	3	5	5	2	1	1	10	1	1	30	1	1	25	1	1	5	1	1	5	1	1	47	1	6	4
0	1	1.85714	5.71429	3.85714	0	44	5	4	3	2	1	3	42.1	#NULL!	42.1	2	1	6	1	2	7	7	1	5	6	5	5	3	3	1	10	1	1	30	1	1	40	0	1	10	0	1	100	0	1	47	1	5	2
0	0	1.57143	5.42857	3.85714	0	59	3	2.25	4	1	0	1	32.32	#NULL!	32.32	2	0	2	3	4	4	5	4	4	6	1	6	2	2	1	10	1	1	25	0	1	10	0	1	10	0	1	100	0	1	24	0	5	2
1	1	1.57143	5.42857	3.85714	0	49	5	6.5	6	0	2	2	22.68	#NULL!	22.68	2	1	2	6	5	4	2	4	6	6	7	5	7	6	1	100	0	1	25	0	1	1/4	0	1	10	0	1	5	1	1	47	1	4	2
1	1	1.28571	5.14286	3.85714	0	62	5	2	3	1	2	3	49.35	#NULL!	49.35	3	1	1	1	1	6	7	2	4	4	2	6	1	1	1	10	1	1	25	0	2		0	1	5	1	1	5	1	2		0	5	1
1	1	1.28571	5.14286	3.85714	1	69	5	1	4	2	2	4	44.95	#NULL!	44.95	1	1	5	2	1	3	6	5	1	4	1	5	1	1	1	10	1	1	30	1	2		0	1	10	0	1	5	1	1	47	1	6	1
1	0	1.42857	5.42857	4	0	35	5	3.75	3	1	1	2	32.38	#NULL!	32.38	1	1	1	6	3	7	2	1	4	4	4	4	4	3	1	10	1	1	3 femtedelar	0	1	33	0	1	10	0	1	500	0	1	47	1	6	1
1	0	1	5	4	1	60	5	2	6	3	3	6	35.05	#NULL!	35.05	3	1	2	3	7	7	5	1	2	2	2	2	2	2	1	10	1	1	30	1	1	25	1	1	5	1	1	5	1	1	47	1	5	1
1	1	1.57143	5.57143	4	1	45	5	2.5	5	2	0	2	33.33	#NULL!	33.33	1	1	4	3	4	6	5	2	4	6	4	6	1	1	1	10	1	1	30	1	1	10	0	1	10	0	1	1	0	1	24	0	5	1
1	1	1	5	4	0	63	2	3.75	4	1	1	2	40.78	#NULL!	40.78	2	0	2	4	2	4	4	4	5	4	5	5	2	3	1	10	1	2		0	1	10	0	1	10	0	1	5	1	1	24	0	5	1
1	1	1	5	4	1	39	5	1.75	7	3	3	6	60	#NULL!	63.05	4	1	5	1	3	7	7	1	2	6	2	3	1	2	1	10	1	1	30	1	1	25%	1	1	5	1	1	5	1	1	47	1	5	1
1	1	1	5	4	1	38	5	1.75	8	3	3	6	51.93	#NULL!	51.93	2	1	6	7	6	7	1	1	2	7	1	5	1	3	1	10	1	1	30	1	1	25	1	1	5	1	1	5	1	1	47	1	6	1
0	1	1.28571	5.28571	4	0	66	3	2.5	6	1	3	4	33.65	#NULL!	33.65	3	1	4	3	5	7	5	1	5	5	1	5	1	3	1	10	1	2		0	1	40	0	1	5	1	1	5	1	1	47	1	5	1
0	1	1.14286	5.28571	4.14286	1	40	3	1.25	5	1	1	2	43.13	#NULL!	43.13	3	0	5	7	7	7	1	1	1	1	1	1	1	2	1	10	1	1	25	0	2		0	1	10	0	1	5	1	1	24	0	6	1
1	0	1	5.14286	4.14286	1	73	4	1	6	3	2	5	33.85	#NULL!	33.85	3	0	5	2	3	6	6	2	1	1	1	1	1	1	1	10	1	1	30	1	1	25	1	1	10	0	1	5	1	1	47	1	4	1
1	1	1	5.14286	4.14286	0	48	5	2.5	4	0	1	1	33.25	#NULL!	33.25	2	0	3	2	4	5	6	3	4	4	4	5	1	1	1	100	0	2		0	2		0	1	65	0	1	5	1	2		0	4	1
1	1	1.28571	5.42857	4.14286	0	55	4	6.5	6	0	0	0	26.13	#NULL!	26.13	2	0	4	4	4	4	4	4	7	5	7	2	7	5	2		0	2		0	2		0	2		0	2		0	2		0	5	3
1	0	1.42857	5.71429	4.28571	0	49	5	3.5	3	1	0	1	26.78	#NULL!	26.78	2	0	2	4	6	6	4	2	5	6	5	6	1	3	1	10	1	2		0	2		0	2		0	2		0	2		0	6	1
0	0	1	5.28571	4.28571	1	29	3	1	4	1	1	2	18.65	#NULL!	18.65	3	1	7	4	4	7	4	1	1	7	1	1	1	1	1	10	1	2		0	1	60	0	1	10	0	1	5	1	2		0	1	1
1	1	1.42857	5.71429	4.28571	0	48	3	3.5	9	0	1	1	46.62	#NULL!	46.62	3	1	6	4	7	7	4	1	4	4	7	1	2	1	2		0	1	25	0	1	20	0	1	10	0	1	5	1	2		0	5	1
1	1	1	5.28571	4.28571	1	49	5	2	5	2	2	4	19.75	#NULL!	19.75	1	1	5	1	1	6	7	2	2	5	1	5	1	4	1	10	1	1	30	1	1	40	0	1	5	1	1	5	1	1	24	0	5	1
0	1	1.14286	5.42857	4.28571	1	70	4	4.5	4	1	1	2	53.17	#NULL!	53.17	3	1	5	2	6	4	6	4	6	6	6	4	4	2	1	10	1	1	20	0	1	30	0	1	10	0	1	100	0	1	47	1	3	1
1	1	1.14286	5.57143	4.42857	0	41	5	2.25	2	3	3	6	49.87	#NULL!	49.87	2	1	2	2	2	4	6	4	2	5	4	4	2	1	1	10	1	1	30	1	1	25	1	1	5	1	1	5	1	1	47	1	5	1
1	1	1.14286	5.57143	4.42857	1	40	4	2	3	3	3	6	39.85	#NULL!	39.85	2	1	5	2	1	6	6	2	3	5	3	5	1	1	1	10	1	1	30	1	1	25	1	1	5	1	1	5	1	1	47	1	5	1
0	1	1	5.42857	4.42857	1	72	5	1	7	1	0	1	48.17	#NULL!	48.17	4	0	7	4	7	4	4	4	1	1	1	1	1	1	1	10	1	1	25	0	1	6	0	1	10	0	2		0	1	24	0	5	1
0	1	1.28571	5.85714	4.57143	1	57	5	3.75	7	3	3	6	28.03	#NULL!	28.03	1	1	1	5	4	3	3	5	6	4	4	6	2	3	1	10	1	1	30	1	1	25	1	1	5	1	1	5	1	1	47	1	5	1
1	1	1.14286	5.85714	4.71429	1	68	5	3	4	3	1	4	59.05	#NULL!	59.05	2	1	2	5	5	2	3	6	4	4	4	2	1	3	1	10	1	1	30	1	1	25	1	1	10	0	1	5	1	2		0	5	1
1	1	1	5.71429	4.71429	1	74	5	1	7	1	3	4	29.72	#NULL!	29.72	3	1	3	6	6	6	2	2	1	2	1	2	1	1	1	10	1	1	25	0	1	33	0	1	5	1	1	5	1	1	47	1	6	1
1	1	1	5.85714	4.85714	1	70	4	1.5	7	1	1	2	36.02	#NULL!	36.02	1	1	6	6	6	2	2	6	2	5	2	1	1	1	1	10	1	1	25	0	2		0	1	10	0	1	100	0	1	47	1	5	1
1	0	1	6	5	1	60	3	1	7	3	1	4	60	#NULL!	129.15	3	0	5	5	5	5	3	3	1	1	1	1	1	1	1	10	1	1	30	1	1	25	1	2		0	1	100	0	1	47	1	6	1
1	1	1	6	5	0	62	5	4.5	6	1	1	2	34.25	#NULL!	34.25	2	0	4	2	1	4	6	4	5	4	5	7	5	3	1	10	1	2		0	1	20	0	1	10	0	1	100	0	1	47	1	6	1
1	1	1	6	5	0	62	4	3.5	5	1	0	1	31.72	#NULL!	31.72	4	1	1	6	2	1	2	7	4	7	7	4	1	2	1	10	1	2		0	1	33	0	2		0	1	100	0	2		0	6	1
[truncated: 100 more columns]
